# Supplementary material
Source: PubMed Central journal article supplement (PMC2891571)
Supplement: NIHMS91703-supplement-1_si_001.pdf [file NIHMS91703-supplement-1_si_001.pdf]

| Protein                                                  | Swiss-Prot acc. no. | protein mass (Da) | data set | matched peptides | slice no. | charge state | ions  | Xcorr  | assigned sequence      |
|----------------------------------------------------------|---------------------|-------------------|----------|------------------|-----------|--------------|-------|--------|------------------------|
| Clathrin coat assembly protein AP180                     | Q61548              | 91,851            | B        | 1                | 3         | 2            | 11/20 | 2.031  | FLALGCSSLGR            |
|                                                          |                     |                   | A        | 1                | 2         | 2            | 18/22 | 3.5174 | NTLFNLSNFLDK           |
|                                                          |                     |                   | C        | 2                | 2         | 2            | 20/28 | 4.071  | IAAQYSVTGSAVAR         |
| Contactin-1                                              | P12960              | 113,388           | A        | 1                | 1         | 2            | 16/20 | 2.5144 | VQVTSQEYSAR            |
|                                                          |                     |                   | B        | 3                | 1         | 2            | 16/20 | 3.181  | VQVTSQEYSAR            |
|                                                          |                     |                   |          |                  |           | 3            | 28/88 | 4.128  | IKTDGAAPNVAPSDVGGGGTNR |
|                                                          |                     |                   |          |                  |           | 2            | 20/26 | 3.656  | NDGGYTCFAENNR          |
| Endophilin-1                                             | Q62420              | 39,877            | A        | 2                | 4         | 2            | 17/22 | 4.1497 | TIEYLQNPASR            |
|                                                          |                     |                   |          |                  |           | 2            | 18/22 | 3.7452 | TIEYLQNPASR            |
| Endophilin-2                                             | Q62419              | 41,518            | C        | 1                | 4         | 2            | 17/22 | 3.011  | QAVQILQQVTVR           |
|                                                          |                     |                   | A        | 1                | 3         | 2            | 39/43 | 2.3245 | TIEYLQNPASR            |
|                                                          |                     |                   | C        | 1                | 3         | 2            | 13/24 | 2.254  | QTEVLLQPNPASR          |
| Fascin                                                   | Q61553              | 54,508            | A        | 2                | 3         | 2            | 15/24 | 3.0781 | LSCFAQSVSPA EK         |
|                                                          |                     |                   |          |                  |           | 3            | 31/60 | 5.2301 | LVARPEPATGFTLEFR       |
|                                                          |                     |                   | B        | 5                | 3         | 2            | 15/18 | 2.182  | FLVVAHDDGR             |
|                                                          |                     |                   |          |                  |           | 2            | 18/24 | 3.499  | LSCFAQSVSPA EK         |
|                                                          |                     |                   |          |                  |           | 2            | 18/32 | 3.326  | YWTLTATGGVQSTASTK      |
|                                                          |                     |                   |          |                  |           | 3            | 26/60 | 3.291  | LVARPEPATGFTLEFR       |
|                                                          |                     |                   |          |                  |           | 2            | 16/24 | 3.152  | LSCFAQSVSPA EK         |
| Gamma-soluble NSF attachment protein                     | Q9CWZ7              | 34,732            | A        | 1                | 4         | 2            | 16/24 | 2.6851 | LGLSLVPPGGGIK          |
| Gelsolin                                                 | P13020              | 85,942            | B        | 1                | 4         | 2            | 14/18 | 2.187  | LPEAVQLIEK             |
|                                                          |                     |                   | A        | 1                | 2         | 2            | 13/24 | 2.6262 | SGALNSNDAFVLK          |
|                                                          |                     |                   | B        | 3                | 2         | 3            | 34/56 | 4.297  | DSQEEKTEALTS AK        |
| Glutathione S-transferase Mu 1                           | P10649              | 25,970            |          |                  |           | 2            | 16/32 | 2.592  | QTQVSVLPEGGETPLFK      |
|                                                          |                     |                   |          |                  |           | 3            | 31/56 | 3.555  | DSQEEKTEALTS AK        |
|                                                          |                     |                   | A        | 1                | 5         | 2            | 39432 | 2.4096 | ITQSNAILR              |
| Guanine nucleotide-binding protein alpha-12              | P27600              | 44,095            | C        | 1                | 5         | 2            | 15/22 | 2.719  | ADIVENQVMDTR           |
|                                                          |                     |                   | A        | 2                | 4         | 2            | 18/22 | 3.2104 | TTGIVETHFTFK           |
|                                                          |                     |                   |          |                  |           | 2            | 19/28 | 3.5463 | IAQSDYIPTQQDVL R       |
| Guanine nucleotide-binding protein G(i), alpha-2         | P08752              | 40,471            | C        | 2                | 4         | 2            | 13/20 | 2.052  | ILLGAGESGK             |
|                                                          |                     |                   |          |                  |           | 2            | 18/20 | 3.35   | ILLGAGESGK             |
|                                                          |                     |                   | A        | 1                | 4         | 2            | 17/20 | 3.094  | LLLLGAGESGK            |
| Guanine nucleotide-binding protein G(i), alpha-2         | P08752              | 40,471            | B        | 2                | 4         | 2            | 11/14 | 2.157  | LFDVGGQR               |
|                                                          |                     |                   |          |                  |           | 2            | 10/22 | 2.083  | QFEDLNRNKETK           |
|                                                          |                     |                   | A        | 1                | 4         | 2            | 16/18 | 3.0221 | LLVSASQD GK            |
| Guanine nucleotide-binding protein G(I)/G(S)/G(T) beta 3 | Q61011              | 37,240            | C        | 1                | 4         | 2            | 11/14 | 2.188  | LFDVGGQR               |
|                                                          |                     |                   | A        | 7                | 4         | 2            | 13/14 | 2.4097 | YYLDSLDR               |
| Guanine nucleotide-binding protein G(o) alpha 1          | P18872              | 40,085            | A        | 7                | 4         | 2            | 18/28 | 3.9429 | IGAGDYQPTEQDIL R       |
|                                                          |                     |                   |          |                  |           | 2            | 19/28 | 4.1886 | IGAGDYQPTEQDIL R       |
|                                                          |                     |                   |          |                  |           | 3            | 27/52 | 3.8682 | AM*DTLGVEYGDKER        |
|                                                          |                     |                   |          |                  |           | 2            | 20/28 | 4.2066 | IGAGDYQPTEQDIL R       |
|                                                          |                     |                   |          |                  |           | 2            | 20/32 | 4.3227 | M*EDTEPFSAELLSAM*M*R   |
|                                                          |                     |                   |          |                  |           | 2            | 17/24 | 2.8351 | IIHEDGFSGEDVK          |
|                                                          |                     |                   | B        | 2                | 4         | 2            | 17/28 | 3.757  | IGAGDYQPTEQDIL R       |
|                                                          |                     |                   |          |                  |           | 2            | 19/28 | 4.507  | IGAGDYQPTEQDIL R       |
|                                                          |                     |                   | C        | 6                | 4         | 2            | 13/14 | 2.532  | MVCDVVS R              |
|                                                          |                     |                   |          |                  |           | 3            | 24/48 | 2.796  | IIHEDGFSGEDVK          |

| Protein                                       | Swiss-Prot acc. no. | protein mass (Da) | data set | matched peptides | slice no. | charge state | ions  | Xcorr  | assigned sequence         |
|-----------------------------------------------|---------------------|-------------------|----------|------------------|-----------|--------------|-------|--------|---------------------------|
|                                               |                     |                   |          |                  |           | 2            | 19/24 | 2.938  | IHEDGFSGEDVK              |
|                                               |                     |                   |          |                  |           | 1            | 9/14  | 1.745  | YYLDSLDR                  |
|                                               |                     |                   |          |                  |           | 2            | 14/20 | 2.975  | SREYQLNSAK                |
|                                               |                     |                   |          |                  |           | 2            | 16/20 | 3.418  | SREYQLNSAK                |
| Guanine nucleotide-binding protein G(q) alpha | P21279              | 41,483            | A        | 1                | 4         | 2            | 19/36 | 4.2588 | VPTTGHEYPFDLQSVIFR        |
|                                               |                     |                   | B        | 1                | 4         | 2            | 13/18 | 2.559  | LINQPLPDLK                |
| Heat shock protein HSP 90-beta                | P11499              | 83,325            | A        | 2                | 2         | 2            | 39/43 | 2.5783 | IDILPNPQER                |
|                                               |                     |                   |          |                  |           | 2            | 21/24 | 4.1016 | TLTLVDTGIGM*TK            |
|                                               |                     |                   | B        | 2                | 2         | 2            | 10/16 | 2.199  | APFDLFENK                 |
|                                               |                     |                   |          |                  |           | 2            | 15/18 | 2.718  | SIYYITGESK                |
| Homer protein homolog 1                       | Q9Z2Y3              | 41,413            | A        | 1                | 4         | 2            | 18/28 | 4.5292 | TELNQTVQEEETLK            |
|                                               |                     |                   | B        | 1                | 4         | 3            | 18/68 | 2.664  | CGASSGQTSGCGSGQSTR        |
| Kinesin-like protein KIF2                     | P28740              | 79,756            | B        | 1                | 2         | 2            | 11/16 | 2.063  | SLASLVEIK                 |
|                                               |                     |                   | C        | 1                | 2         | 2            | 13/20 | 2.236  | FSLIDLAGNER               |
| L-lactate dehydrogenase A chain               | P06151              | 36,499            | A        | 2                | 4         | 2            | 39434 | 2.4377 | VTLTPEEAR                 |
|                                               |                     |                   |          |                  |           | 2            | 19/22 | 2.8313 | VIGSGCNLSAR               |
|                                               |                     |                   | B        | 1                | 4         | 2            | 18/22 | 2.909  | VIGSGCNLSAR               |
| Microtubule-associated protein tau            | P10637              | 76,243            | A        | 2                | 4         | 2            | 13/20 | 2.5948 | SPVVSQDTSR                |
|                                               |                     |                   |          |                  |           | 2            | 13/22 | 2.881  | LQTAPVPM*PDLK             |
|                                               |                     |                   | B        | 1                | 4         | 2            | 14/16 | 2.451  | IAENVVEVK                 |
|                                               |                     |                   | C        | 5                | 4         | 2            | 11/24 | 2.227  | GTKEASLQEPGK              |
|                                               |                     |                   |          |                  |           | 2            | 17/20 | 3.16   | SPVVSQDTSR                |
|                                               |                     |                   |          |                  |           | 2            | 17/28 | 3.328  | SGYSSPGSPGTPGSR           |
|                                               |                     |                   |          |                  |           | 2            | 15/28 | 3.023  | SGYSSPGSPGTPGSR           |
|                                               |                     |                   |          |                  |           | 2            | 18/20 | 3.1    | SPVVSQDTSR                |
| Mitsugumin-23                                 | Q3UBX0              | 26,306            | B        | 1                | 6         | 2            | 14/20 | 2.665  | NNNQQLAQLQK               |
|                                               |                     |                   | C        | 1                | 6         | 2            | 14/20 | 2.784  | NNNQQLAQLQK               |
| Myosin-VI                                     | Q64331              | 146,409           | A        | 1                | 1         | 2            | 22/28 | 4.4478 | IVEANPLLEAFGNAK           |
|                                               |                     |                   | B        | 3                | 1         | 2            | 16/20 | 2.462  | IQAEEVAQLAR               |
|                                               |                     |                   |          |                  |           | 2            | 22/28 | 3.662  | YLTESYGTGQDIDDR           |
|                                               |                     |                   |          |                  |           | 2            | 20/28 | 3.546  | IVEANPLLEAFGNAK           |
| Myristoylated alanine-rich C-kinase substrate | P26645              | 29,661            | B        | 3                | 2         | 3            | 30/68 | 3.682  | KESGEGAEAEAGATAEGAK       |
|                                               |                     |                   |          |                  |           | 2            | 23/32 | 3.964  | ESGEGAEAEAGATAEGAK        |
|                                               |                     |                   |          |                  |           | 2            | 17/28 | 3.194  | AEDGAAPSPSETPK            |
|                                               |                     |                   | A        | 1                | 2         | 2            | 14/28 | 2.453  | AEDGAAPSPSETPK            |
| Nck-associated protein 1                      | P28660              | 128,784           | A        | 1                | 1         | 2            | 14/18 | 2.6849 | AAEDLFVNIR                |
|                                               |                     |                   | B        | 1                | 2         | 2            | 16/18 | 2.657  | AAEDLFVNIR                |
| Neuromodulin (GAP-43)                         | P06837              | 23,632            | A        | 3                | 5         | 2            | 16/20 | 2.8689 | AGSAETESAAK               |
|                                               |                     |                   |          |                  |           | 2            | 20/46 | 3.4089 | QADVPAAVTDAAAATTPAAEDAATK |
|                                               |                     |                   |          |                  |           | 2            | 18/22 | 2.5513 | KGDAPAAEAEAK              |
|                                               |                     |                   | C        | 1                | 5         | 2            | 16/22 | 2.167  | KGDAPAAEAEAK              |
| Phosphatase 2A inhibitor, TAF-1, SET          | Q9EQU5              | 33,378            | B        | 1                | 4         | 2            | 20/26 | 4.166  | AIEQSIEQEEGLNR            |
|                                               |                     |                   | C        | 2                | 4         | 2            | 16/20 | 3.585  | LNEQASEEILK               |
|                                               |                     |                   |          |                  |           | 2            | 15/18 | 2.716  | VEVTEFEDIK                |
| Probable oxidoreductase KIAA1576              | Q80TB8              | 45,817            | A        | 1                | 4         | 2            | 17/22 | 3.5346 | AVVLAFGFGGLNK             |
|                                               |                     |                   | B        | 1                | 4         | 2            | 15/16 | 2.248  | LAIFTDDIK                 |
| Protein disulfide-isomerase A3                | P27773              | 56,678            | A        | 3                | 4         | 2            | 18/28 | 3.6569 | M*DATANDVSPSPYEVK2        |
|                                               |                     |                   |          |                  |           | 2            | 12/20 | 2.1983 | ELNDFISYLQR               |
|                                               |                     |                   |          |                  |           | 2            | 15/20 | 2.4851 | LAPEYEAATR                |

| Protein                                        | Swiss-Prot acc. no. | protein mass (Da) | data set | matched peptides | slice no. | charge state | ions  | Xcorr  | assigned sequence  |
|------------------------------------------------|---------------------|-------------------|----------|------------------|-----------|--------------|-------|--------|--------------------|
|                                                |                     |                   | C        | 1                | 4         | 2            | 14/18 | 2.643  | YGVSGYPTLK         |
| Protein kinase C gamma type                    | P63318              | 78,358            | A        | 1                | 2         | 2            | 16/20 | 2.5913 | SGENFDKFFTR        |
|                                                |                     |                   | C        | 1                | 2         | 2            | 17/20 | 2.451  | SGENFDKFFTR        |
| Protein phosphatase 1 regulatory subunit 7     | Q3UM45              | 41,262            | A        | 2                | 4         | 2            | 22/34 | 4.6823 | AIENIDTLTNLESFLGK  |
|                                                |                     |                   |          |                  |           | 2            | 21/34 | 5.1646 | AIENIDTLTNLESFLGK  |
|                                                |                     |                   | C        | 1                | 3         | 2            | 20/34 | 2.787  | AIENIDTLTNLESFLGK  |
| Ras-related protein Rab-2A                     | P53994              | 23,548            | B        | 1                | 5         | 3            | 18/56 | 2.66   | LVEALPHNTSLVELK    |
|                                                |                     |                   | C        | 1                | 5         | 2            | 17/20 | 2.556  | LLIIGNSSVGK        |
| Serine/threonine-protein phosphatase 2B        | P63328              | 58,644            | A        | 2                | 3         | 2            | 17/22 | 2.8446 | LFEVGGSPANTR       |
|                                                |                     |                   |          |                  |           | 2            | 16/18 | 2.1796 | IITEGASILR         |
|                                                |                     |                   | C        | 1                | 3         | 2            | 12/16 | 2.53   | YENNVNMR           |
| Serine/threonine-protein phosphatase PP1-alpha | P62137              | 37,540            | A        | 2                | 4         | 2            | 14/16 | 2.6103 | LNLDSIIGR          |
|                                                |                     |                   |          |                  |           | 2            | 13/16 | 2.6992 | YPENFFLLR          |
|                                                |                     |                   | B        | 1                | 4         | 2            | 16/20 | 2.775  | FDEETTNGEGR        |
| Spectrin beta chain                            | P15508              | 245,250           | A        | 1                | 1         | 3            | 25/36 | 3.3898 | HRPDLIDFDK         |
|                                                |                     |                   | B        | 2                | 1         | 3            | 32/56 | 5.113  | KFEFQTDLAAHEER     |
|                                                |                     |                   |          |                  |           | 3            | 26/52 | 3.373  | FEFQTDLAAHEER      |
| Synaptogyrin-1                                 | O55100              | 25,653            | A        | 1                | 5         | 2            | 17/22 | 3.2587 | AGGAFDPYTLVR       |
|                                                |                     |                   | B        | 1                | 5         | 2            | 16/20 | 2.505  | YLSEVASGENK        |
| Synaptojanin-1                                 | Q8CHC4              | 172,617           | A        | 1                | 1         | 2            | 19/22 | 2.6371 | VLDAYGLLGVLVLR     |
|                                                |                     |                   | B        | 1                | 1         | 2            | 18/22 | 2.354  | VLDAYGLLGVLVLR     |
| Syntaxin-1A                                    | O35526              | 33,054            | A        | 1                | 6         | 2            | 17/26 | 3.0398 | SIEQSIEQEEGLNR     |
|                                                |                     |                   | B        | 1                | 4         | 2            | 18/22 | 3.056  | NSVVEASEAAYK       |
| Syntaxin-1B                                    | O35525              | 33,079            | A        | 1                | 4         | 3            | 25/52 | 3.9199 | TKQELEDLTADIKK     |
|                                                |                     |                   | B        | 1                | 4         | 2            | 18/26 | 3.204  | TASNVEEAFINTAK     |
|                                                |                     |                   |          |                  |           | 2            | 17/22 | 3      | AGAAFPVFSFAR       |
| Tenascin-R                                     | Q8BY19              | 149,563           | A        | 1                | 1         | 2            | 18/24 | 3.1806 | SSLTSTVFTTGGR      |
|                                                |                     |                   | C        | 1                | 1         | 2            | 20/24 | 2.674  | SSLTSTVFTTGGR      |
| Transgelin-3                                   | Q9RIQ8              | 22,471            | A        | 4                | 5         | 2            | 39430 | 2.5451 | AAEVYGVR           |
|                                                |                     |                   |          |                  |           | 2            | 39369 | 1.6532 | YDADLENK           |
|                                                |                     |                   |          |                  |           | 2            | 39400 | 1.8075 | GFSEEQLR           |
|                                                |                     |                   |          |                  |           | 2            | 15/22 | 2.4667 | TLM*ALGSVAVTK      |
|                                                |                     |                   | B        | 3                | 5         | 2            | 15/20 | 2.972  | YLSEVASGENK        |
|                                                |                     |                   |          |                  |           | 2            | 20/22 | 2.935  | YLILNATQAESK       |
|                                                |                     |                   |          |                  |           | 2            | 12/16 | 2.838  | DTDSEEEIR          |
| Tropomodulin-2                                 | Q9JKK7              | 39,511            | A        | 1                | 4         | 2            | 17/26 | 3.665  | SNDPVALAFAEM*LK    |
|                                                |                     |                   |          | 1                | 4         | 2            | 16/20 | 2.775  | FDEETTNGEGR        |
| Ubiquitin-activating enzyme E1                 | Q02053              | 117,809           | A        | 2                | 1         | 2            | 30/68 | 2.562  | NEEDATELVGLAQAVNAR |
|                                                |                     |                   |          |                  |           | 2            | 20/26 | 4.251  | QPAENVNQYLTDISK    |
|                                                |                     |                   | B        | 2                | 1         | 2            | 14/20 | 2.311  | AENYDISPADR        |
|                                                |                     |                   |          |                  |           | 2            | 12/26 | 2.2    | QPAENVNQYLTDISK    |
|                                                |                     |                   | C        | 3                | 1         | 2            | 20/34 | 3.122  | NEEDATELVGLAQAVNAR |
|                                                |                     |                   |          |                  |           | 3            | 27/68 | 3.405  | NEEDATELVGLAQAVNAR |
|                                                |                     |                   |          |                  |           | 2            | 11/26 | 2.305  | QPAENVNQYLTDISK    |
| Ubiquitin carboxyl-terminal hydrolase 5        | P56399              | 95,833            | B        | 1                | 1         | 2            | 15/24 | 2.215  | EEDTSAGTGDPPR      |
|                                                |                     |                   | C        | 2                | 2         | 2            | 13/18 | 2.626  | SSENPNEVFR         |
|                                                |                     |                   |          |                  |           | 2            | 12/20 | 2.312  | DGLGGLPDIVR        |
| Vacuolar proton translocating ATPase A1        | Q9Z1G4              | 96,501            | A        | 1                | 1         | 2            | 13/20 | 2.7782 | DLNPDVNVFQR        |
|                                                |                     |                   | B        | 2                | 2         | 2            | 16/18 | 3.092  | TSATWFALSR         |

| Protein | Swiss-Prot acc. no. | protein mass (Da) | data set | matched peptides | slice no. | charge state | ions  | Xcorr | assigned sequence |
|---------|---------------------|-------------------|----------|------------------|-----------|--------------|-------|-------|-------------------|
|         |                     |                   |          |                  |           | 2            | 17/20 | 2.612 | LNIPVNQVNPR       |
|         |                     |                   | C        | 2                | 2         | 2            | 15/30 | 2.383 | ADIGIAMGITGSDVSK  |

Supplemental Table 1: **Proteins and peptides identified by LC-ESI-MS/MS that are exclusive to wild-type mouse brain tissue samples and appear in at least two of three data sets.** The columns indicate the SWISS-PROT accession number (acc. no), protein mass in Daltons (Da), whether the peptide was identified in data set A, B, or C (data set), the number of matched peptides, the gel slice from which the peptide originated, the charge state of the ion, the number of ions identified/the maximum number of ions, the Xcorr value, and the assigned amino acid sequence. M\*, oxidized methionine residue. Table 1 lists proteins that were identified in at least two of the three data sets from  $\alpha$ -bgtx isolations of different mouse brain preparations.

Supplemental Table 2:

| Protein                                                   | Swiss-Prot acc. no. | protein mass (Da) | data set | matched peptides | slice no. | charge state | ions  | Xcorr  | assigned sequence      |
|-----------------------------------------------------------|---------------------|-------------------|----------|------------------|-----------|--------------|-------|--------|------------------------|
| 14-3-3 protein theta                                      | P68254              | 27,778            | A        | 1                | 6         | 2            | 21/26 | 4.2086 | AVTEQGAELSNEER         |
| 1-phosphatidylinositol-4,5-bisphosphate phosphodiesterase | Q8K3R3              | 92,694            | B        | 1                | 1         | 2            | 12/16 | 2.33   | TVQMIMETR              |
| 2,4-dienoyl-CoA reductase                                 | Q9LTV6              | 31,796            | C        | 1                | 6         | 2            | 19/24 | 3.142  | VAFITGGGTGLGK          |
| 26S proteasome subunit p45                                | P62196              | 45,626            | B        | 1                | 4         | 2            | 20/24 | 3.522  | LEGGSGGDSEVQR          |
| 3-hydroxybutyrate dehydrogenase                           | Q3UL45              | 38,299            | A        | 1                | 4         | 2            | 14/20 | 2.6697 | FGIEAFSDCLR            |
| 4F2 heavy chain (AA 1-526)                                | P10852              | 58,337            | B        | 2                | 2         | 2            | 15/20 | 2.621  | VAEDETEAGVK            |
|                                                           |                     |                   |          |                  |           | 2            | 17/18 | 3.189  | IGDLQAFVGR             |
| 6-phosphofructokinase                                     | P47857              | 85,269            | C        | 1                | 3         | 2            | 16/20 | 3.431  | NLEQISANTK             |
| ACF7 neural isoform 1                                     | Q9QXZ0              | 607,977           | C        | 1                | 2         | 3            | 20/72 | 2.734  | NTQGTTSSTHSASADIEK     |
| Actin related protein 2                                   | Q8BMA4              | 37,322            | A        | 2                | 4         | 2            | 18/22 | 2.5906 | DLM*VGDEASELR          |
|                                                           |                     |                   |          |                  |           | 2            | 16/22 | 3.0164 | ILLTEPPM*NPTK          |
| Actin-binding LIM protein 2                               | Q8BL65              | 68,107            | B        | 1                | 3         | 2            | 12/16 | 2.302  | DCFTCSNCK              |
| Aczonin                                                   | Q9QYX7              | 547,570           | C        | 1                | 1         | 2            | 11/16 | 2.101  | APVADVEPK              |
| ADP-ribosylation GTPase-activating protein 1              | Q9EPJ9              | 45,288            | C        | 1                | 4         | 1            | 8/16  | 1.581  | DVTTFFSGK              |
| Alpha glucosidase II, beta subunit                        | O08795              | 58,793            | B        | 2                | 4         | 2            | 11/18 | 2.153  | SLEDQVETLR             |
|                                                           |                     |                   |          |                  |           | 2            | 11/20 | 2.06   | ESLQQLAEVTR            |
| Alpha-internexin                                          | P46660              | 55,742            | A        | 1                | 3         | 2            | 15/18 | 2.4596 | ALEAELALR              |
| Alpha-S1                                                  | P19228              | 35,602            | C        | 1                | 6         | 2            | 11/24 | 2.176  | QADYVSPDQDLR           |
| Aminopeptidase                                            | P97449              | 109,651           | C        | 1                | 2         | 2            | 13/16 | 2.475  | SPVYLTVLK              |
|                                                           |                     |                   |          |                  |           | 2            | 11/24 | 2.341  | VLGATLSPELIQK          |
| Apolipoprotein E                                          | P08226              | 35,867            | C        |                  |           | 2            | 13/16 | 2.71   | LGPLVEQGR              |
| Apoprotein A-I                                            | Q00623              | 30,587            | C        | 1                | 5         | 2            | 18/24 | 3.203  | VAPLGAELQESAR          |
| Beta-enolase                                              | P21550              | 47,025            | A        | 2                | 4         | 2            | 20/28 | 3.9976 | VNQGVSVTESIQAACK       |
|                                                           |                     |                   |          |                  |           | 2            | 17/28 | 3.9896 | VNQGVSVTESIQAACK       |
| BIT                                                       | P97797              | 56,425            | C        | 1                | 5         | 3            | 25/64 | 2.554  | DGQELHPLETTVNPSPGK     |
| BTB/POZ domain-containing protein KCTD12                  | Q6WVG3              | 35,892            | A        | 1                | 4         | 2            | 13/22 | 2.9174 | EAEYFELPELVK           |
| Calcium-binding protein 1                                 | Q9JLK7              | 25,943            | C        | 1                | 5         | 2            | 13/20 | 2.3    | GESPVDYDGGK            |
| Calcium-binding carrier protein Aralar1                   | Q8BH59              | 74,570            | C        | 2                | 3         | 2            | 14/18 | 2.303  | SPSVAVAQPK             |
| Calcium-dependent secretion activator 1                   | Q80TJ1              | 153,044           | A        | 1                | 1         | 2            | 18/20 | 3.3277 | FVTILEGLVAK            |
| Capping protein alpha 1 subunit                           | P47753              | 32,940            | B        | 2                | 4         | 3            | 23/56 | 2.541  | SKQEALKNDLVEALK        |
|                                                           |                     |                   |          |                  |           | 3            | 23/52 | 2.84   | KLEVEANNAFDQYR         |
|                                                           |                     |                   |          |                  |           | 2            | 20/24 | 3.446  | LEVEANNAFDQYR          |
| Casein kinase II subunit alpha                            | Q60737              | 45,162            | A        | 1                | 4         | 3            | 23/56 | 3.0749 | TPALVFEHVNTDFK         |
| Cation-transporting ATPase                                | Q8K314              | 101,683           | A        | 1                | 1         | 2            | 16/20 | 3.0633 | GHIDTVSEQR             |
| Coiled-coil protein                                       | Q9ESK9              | 182,365           | B        | 1                | 3         | 2            | 8/16  | 2.098  | LVKNHEQDK              |
| COP9 signalosome complex subunit 1                        | Q99LD4              | 53,442            | C        | 2                | 4         | 2            | 16/22 | 2.216  | ATTADGSSILDR           |
|                                                           |                     |                   |          |                  |           | 2            | 19/22 | 2.876  | ATTADGSSILDR           |
| Coronin-3                                                 | Q9WUM4              | 53,121            | B        | 2                | 3         | 2            | 15/18 | 2.022  | NADPILSLK              |
|                                                           |                     |                   |          |                  |           | 3            | 23/48 | 2.799  | KPTDTASVQNEAK          |
| Cytochrome C                                              | P62897              | 11,605            | B        | 3                | 7         | 2            | 16/26 | 3.549  | TGQAAGFSYTDANK         |
|                                                           |                     |                   |          |                  |           | 2            | 13/14 | 2.233  | ADLIAYLK               |
|                                                           |                     |                   |          |                  |           | 3            | 23/56 | 3.069  | KTGQAAGFSYTDANK        |
| Dihydrolypoyllysine-residue succinyltransferase           | Q9D2G2              | 48,995            | A        | 4                | 4         | 2            | 19/40 | 3.0799 | NDVITVQTPAFAESVTEGDVDR |
|                                                           |                     |                   |          |                  |           | 2            | 15/20 | 2.3649 | VEGGTPLFTLR            |
|                                                           |                     |                   |          |                  |           | 2            | 18/22 | 3.582  | NVETM*NYADIER          |
|                                                           |                     |                   |          |                  |           | 2            | 29/40 | 5.8293 | ASAFALQEQQPVVNAVIDDATK |
| Dihydropyrimidinase-related protein 4                     | O35098              | 61,962            | B        | 1                | 2         | 2            | 16/18 | 3.223  | SAADIILAR              |

| Protein                                                 | Swiss-Prot acc. no. | protein mass (Da) | data set | matched peptides | slice no. | charge state | ions  | Xcorr  | assigned sequence         |
|---------------------------------------------------------|---------------------|-------------------|----------|------------------|-----------|--------------|-------|--------|---------------------------|
| Drebrin A                                               | Q9QXS6              | 77,287            | B        | 1                | 1         | 2            | 20/34 | 4.44   | SPSDSSTASTPIAEQIER        |
|                                                         |                     |                   |          | 1                | 2         | 2            | 22/34 | 4.292  | SPSDSSTASTPIAEQIER        |
| Dynammin-like 120 kDa protein                           | P58281              | 111,339           | C        | 2                | 1         | 2            | 12/18 | 2.15   | GVEVDPSLIK                |
|                                                         |                     |                   |          |                  |           | 2            | 14/22 | 2.947  | EVLEDFEAEDGEK             |
| Electron transferring flavoprotein, alpha polypeptide   | Q99LC5              | 35,009            | B        | 1                | 4         | 2            | 25/34 | 4.755  | GTSFEAAATSGGSASSEK        |
| Elongation factor 1-alpha                               | Q3TII3              | 50,104            | A        | 1                | 4         | 3            | 32/92 | 4.8238 | VETGVLKPGM*VVTFAPVNVVTEVK |
| Elongation factor 2                                     | O89069              | 28,657            | B        | 1                | 5         | 2            | 16/18 | 2.774  | GEGQLSAAER                |
| Endophilin-B2                                           | Q8R3V5              | 44,503            | C        | 1                | 5         | 2            | 21/24 | 4.233  | QTEVLLQPNSAR              |
| Endoplasmin                                             | P08113              | 92,476            | A        | 2                | 1         | 2            | 39434 | 2.5856 | EAESSPFVER                |
|                                                         |                     |                   |          |                  |           | 2            | 20/26 | 4.2036 | GVVSDDDLPLNVSRL           |
| Eukaryotic translation elongation factor 1-delta        | P57776              | 31,293            | B        | 1                | 4         | 2            | 15/22 | 2.148  | GVVQDLQQAISK              |
| Excitatory amino acid transporter 1, Slc1a3             | P56564              | 59,622            | A        | 2                | 4         | 3            | 29/76 | 3.6442 | TTTNVLGDSLGAGIVEHLRSR     |
|                                                         |                     |                   |          |                  |           | 3            | 33/56 | 4.6479 | IVQVTAADAFDLIR            |
| Ezrin-radixin-moesin-binding phosphoprotein 50          | P70441              | 38,600            | A        | 1                | 4         | 2            | 19/26 | 2.7348 | AVDPDSPAEEASGLR           |
| F-actin-capping protein subunit alpha-2                 | Q2QL88              | 33,023            | A        | 2                | 4         | 3            | 23/68 | 3.1948 | EATDPRPYEAENAIESWR        |
|                                                         |                     |                   |          |                  |           | 2            | 39430 | 1.8006 | TSVETALR                  |
| F-box only protein 2                                    | Q80UW2              | 33,676            | A        | 2                | 4         | 2            | 19/22 | 4.089  | TDAGSLYELTVR              |
|                                                         |                     |                   |          |                  |           | 2            | 21/28 | 4.7231 | VLAELPATELVQACR           |
| Fumarate hydratase, mitochondrial precursor             | P97807              | 54,371            | A        | 5                | 4         | 2            | 15/20 | 3.0676 | KPVHPNDHVNK               |
|                                                         |                     |                   |          |                  |           | 2            | 17/22 | 3.2091 | AIEM*LGELGSK              |
|                                                         |                     |                   |          |                  |           | 2            | 13/16 | 2.4526 | AADEVAEGK                 |
|                                                         |                     |                   |          |                  |           | 2            | 18/22 | 3.3324 | AIEM*LGELGSK              |
|                                                         |                     |                   |          |                  |           | 2            | 21/40 | 3.5006 | SGLGELLIPENEPGSSIM*PGK    |
| G protein-coupled receptor, family C2A                  | Q8K4Z6              | 104,213           | C        | 1                | 1         | 2            | 13/22 | 2.237  | GQFNSLYQMAPK              |
| Gamma-1 adducin                                         | Q9QYB5              | 78,763            | B        | 1                | 2         | 2            | 20/26 | 3.405  | GLSFSEATASTLVK            |
| Gamma-aminobutyric acid transporter 4, GAT4             | P31650              | 69,889            | B        | 1                | 2         | 2            | 20/30 | 2.865  | GSETLGGGGGAAGTR           |
| Gamma-amino-N-butyrate transaminase                     | P61922              | 56,452            | A        | 2                | 4         | 2            | 18/24 | 3.2707 | VDIEFDYDGLM*K             |
|                                                         |                     |                   |          |                  |           | 2            | 16/28 | 3.0847 | IDIPSEFDWPIAPFPR          |
| Glucose-6-phosphate isomerase                           | P06745              | 62,767            | A        | 2                | 4         | 2            | 21/28 | 4.7525 | ILLANFLAQTEALM*K          |
|                                                         |                     |                   |          |                  |           | 2            | 20/28 | 4.6326 | TFTTQETITNAETAK           |
| Glutamate receptor 2                                    | P23819              | 98,662            | B        | 2                | 1         | 2            | 12/18 | 2.485  | GADQEYSAFR                |
|                                                         |                     |                   |          |                  |           | 2            | 19/28 | 3.814  | QTEIAYGTLDGSGTK           |
| GS2NA                                                   | Q9ERG2              | 87,150            | C        | 1                | 2         | 2            | 17/24 | 2.548  | AYIASAGADALAK             |
| GTP-binding protein G25K                                | P60766              | 21,311            | C        | 1                | 6         | 2            | 13/18 | 2.77   | YVECSALTQR                |
| GTP-binding protein S10                                 | P97950              | 26,541            | C        | 1                | 6         | 2            | 14/20 | 2.306  | IIVIGDSNVGK               |
| Guanine nucleotide-binding protein G(s) subunit alpha   | P63094              | 45,664            | C        | 1                | 3         | 2            | 17/24 | 2.548  | AYIASAGADALAK             |
| Guanine nucleotide-binding protein G(t) subunit alpha-1 | P20612              | 39,967            | C        | 1                | 4         | 2            | 11/16 | 2.299  | KGEFQEVLR                 |
| Heat shock protein 105 kda                              | Q61699              | 96,407            | A        | 1                | 1         | 2            | 14/24 | 2.9056 | VLGTAFDPFLLGGK            |
| Histone H2B type 1-B                                    | Q64475              | 13,952            | A        | 1                | 2         | 2            | 16/28 | 3.2927 | AM*GIM*NSFVNDIFER         |
| Immunoglobulin superfamily receptor PGRL                | Q8R366              | 65,011            | B        | 1                | 2         | 2            | 14/22 | 2.906  | DSQFSYAVFGPR              |
| Impact                                                  | O55091              | 36,276            | C        | 1                | 4         | 2            | 12/20 | 2.08   | NFTNTPDESTK               |
|                                                         |                     |                   |          |                  |           | 2            | 15/24 | 3.172  | TATPQQAQEVHEK             |
|                                                         |                     |                   |          |                  |           | 3            | 20/40 | 2.656  | LDEREAGITEK               |
| Inositol 1,4,5-trisphosphate receptor                   | P11881              | 313,197           | C        | 3                | 1         | 3            | 21/48 | 2.811  | TATPQQAQEVHEK             |
| Inositol monophosphatase                                | O55023              | 30,436            | A        | 1                | 6         | 2            | 17/20 | 2.8252 | SLLVTELGSSR               |
|                                                         |                     |                   |          |                  |           | 2            | 18/32 | 4.2496 | NIANPTAM*LLSATNM*LR       |
| Isocitrate dehydrogenase 3 (NAD+) beta                  | Q91VA7              | 42,195            | A        | 2                | 4         | 2            | 17/18 | 2.7757 | HNNLDLVIIR                |
| Kinesin heavy chain                                     | Q61768              | 109,549           | B        | 1                | 1         | 3            | 20/40 | 2.803  | FRPLNEAELR                |
| Leucine-rich acidic nuclear protein, Anp32, Lanp        | O35381              | 28,538            | A        | 1                | 6         | 2            | 18/20 | 3.1226 | ISGDLEVLAEK               |

| Protein                                              | Swiss-Prot acc. no. | protein mass (Da) | data set | matched peptides | slice no. | charge state | ions   | Xcorr  | assigned sequence          |
|------------------------------------------------------|---------------------|-------------------|----------|------------------|-----------|--------------|--------|--------|----------------------------|
| Leukocyte surface antigen CD47                       | Q61735              | 33,098            | A        | 1                | 4         | 2            | 15/26  | 3.3352 | ISVSDLINGIASLK             |
|                                                      |                     |                   |          |                  |           | 2            | 18/24  | 3.8705 | NVEAQSTEEM*FVK             |
| Manganese superoxide dismutase                       | P09671              | 24,603            | B        | 2                | 5         | 2            | 20/26  | 3.831  | GDVTTQVALQPALK             |
|                                                      |                     |                   |          |                  |           | 3            | 28/56  | 3.359  | HHAAYVNNLNATEEK            |
| MAP kinase kinase 2                                  | Q01986              | 43,465            | C        | 1                | 4         | 1            | 7/12   | 1.587  | EVELTWR                    |
| MAPB1                                                | Q00659              | 76,071            | C        | 2                | 2         | 2            | 19/26  | 3.128  | TPQASTYSYETSDR             |
|                                                      |                     |                   |          |                  |           | 2            | 15/20  | 2.879  | TPEVSGYTYEK                |
| Methylglutaconyl-coa hydratase                       | Q9JLZ3              | 33,395            | A        | 1                | 6         | 2            | 39/43  | 2.4334 | GIVVLGINR                  |
| MKIAA0302 protein                                    | Q6A087              | 222,918           | A        | 9                | 1         | 2            | 17/20  | 3.484  | NQEA VQQLLGR               |
|                                                      |                     |                   |          |                  |           | 2            | 39/40  | 1.532  | AAELQAQWER                 |
|                                                      |                     |                   |          |                  |           | 2            | 39/69  | 1.8409 | DLEAISAR                   |
|                                                      |                     |                   |          |                  |           | 2            | 17/20  | 2.94   | DQADPQCLFLR                |
|                                                      |                     |                   |          |                  |           | 3            | 27/100 | 3.2893 | EKEVEAIQAQAQALAQEDQSAGEVER |
|                                                      |                     |                   |          |                  |           | 2            | 17/20  | 3.089  | IIGTQEQLNQR                |
|                                                      |                     |                   |          |                  |           | 3            | 19/44  | 2.5008 | LAQAHGFGQFLR               |
| MKIAA0968 protein;Ser/Thr protein kinase family.     | Q80TN1              | 55,014            | A        | 1                | 3         | 2            | 16/18  | 2.8679 | VLAGQEYAAK                 |
|                                                      |                     |                   |          |                  |           | 2            | 19/28  | 3.292  | QDQSIVLLGSSGSGK            |
|                                                      |                     |                   |          |                  |           | 2            | 20/32  | 3.71   | NTGESASQLLDAETAER          |
|                                                      |                     |                   |          |                  |           | 2            | 13/18  | 3.051  | DLDIAGFTQK                 |
| Myosin-10                                            | Q61879              | 228,996           | A        | 20               | 5         | 2            | 34/38  | 2.7649 | EQADFAVEALAK               |
|                                                      |                     |                   |          |                  |           | 2            | 33/39  | 1.5997 | LVWIPSER                   |
|                                                      |                     |                   |          |                  |           | 2            | 15/24  | 3.146  | QVLALQSQLADTK              |
|                                                      |                     |                   |          |                  |           | 2            | 13/22  | 2.175  | SDLLLEGFNRYR               |
|                                                      |                     |                   |          |                  |           | 2            | 23/34  | 5.8477 | SLEAEILQEQELASSER          |
|                                                      |                     |                   |          |                  |           | 3            | 22/60  | 2.2803 | TTLQVDTLNTELAER            |
|                                                      |                     |                   |          |                  |           | 2            | 14/18  | 2.4513 | ALELDPNLYR                 |
|                                                      |                     |                   |          |                  |           | 2            | 14/26  | 1.7609 | DELADEIANSASGK             |
|                                                      |                     |                   |          |                  |           | 2            | 22/26  | 4.6021 | ELDDATEANEGLSR             |
|                                                      |                     |                   |          |                  |           | 2            | 39/40  | 2.231  | ELEAELEDER                 |
|                                                      |                     |                   |          |                  |           | 2            | 13/18  | 2.3801 | GGPISFSSSR                 |
|                                                      |                     |                   |          |                  |           | 3            | 18/64  | 2.1993 | HATALEELSEQLQAKR           |
|                                                      |                     |                   |          |                  |           | 3            | 22/44  | 2.2626 | HGFEAASIKER                |
| Myosin-9                                             | Q8VDD5              | 226,357           | A        | 1                | 1         | 2            | 16/18  | 3.2707 | ALELDSNLYR                 |
|                                                      |                     |                   |          |                  |           | 2            | 39/98  | 2.2665 | IVFQEFR                    |
| Myosin-Va                                            | Q99104              | 215,595           | A        | 3                | 1         | 2            | 16/26  | 3.2603 | SAPEVTAPGAPAYR             |
|                                                      |                     |                   |          |                  |           | 2            | 33/46  | 1.8662 | VSVS FIR                   |
| Myosin-XVIIIa                                        | Q9JMH9              | 232,755           | A        | 2                | 1         | 2            | 39/43  | 2.2253 | TALEEQLSR                  |
|                                                      |                     |                   |          |                  |           | 2            | 13/14  | 1.9425 | TFLQELER                   |
| NADH dehydrogenase (ubiquinone) 1 beta subcomplex, 5 | Q9CQH3              | 21,710            | B        | 1                | 6         | 2            | 13/20  | 2.363  | TLAILQIESEK                |
| Neural cell adhesion molecule 1                      | P13595              | 119,351           | A        | 1                | 1         | 2            | 18/20  | 2.8538 | FFLCQVAGDAK                |



| Protein                                           | Swiss-Prot acc. no. | protein mass (Da) | data set | matched peptides | slice no. | charge state | ions   | Xcorr  | assigned sequence                |
|---------------------------------------------------|---------------------|-------------------|----------|------------------|-----------|--------------|--------|--------|----------------------------------|
| Neuronal growth regulator 1, Neurotractin         | Q80Z24              | 37,900            | A        | 1                | 3         | 2            | 18/24  | 3.3601 | VIVNFAPTIQEIK                    |
| Neuroplastin precursor                            | P97300              | 31,277            | C        |                  |           | 2            | 14/16  | 2.78   | NGVELTATR                        |
| N-tropomodulin                                    | P70566              | 39,492            | B        | 2                | 3         | 2            | 18/22  | 3.572  | DREDFVPFTGEK                     |
|                                                   |                     |                   |          | 1                | 4         | 2            | 21/28  | 4.373  | ANDPSLQEVNLNLIK                  |
|                                                   |                     |                   |          |                  |           | 2            | 20/28  | 4.401  | ANDPSLQEVNLNLIK                  |
| Nucleosome assembly protein 1-like 1              | P28656              | 45,345            | A        | 1                | 4         | 2            | 16/18  | 2.5161 | IVTSEEVIIR                       |
|                                                   |                     |                   |          | 2                | 3         | 2            | 14/20  | 2.679  | EAATVEELNPK                      |
|                                                   |                     |                   |          |                  |           | 3            | 26/64  | 3.255  | LDNVSHTPSSYIETLPK                |
| p23                                               | P63028              | 19,462            | C        | 1                | 7         | 2            | 12/14  | 2.027  | DVNVNFEK                         |
| P400 protein                                      | P11881              | 313,197           | C        | 3                | 1         | 3            | 27/76  | 4.006  | EADPDHYQSGEGTQATTDK              |
|                                                   |                     |                   |          |                  |           | 2            | 15/18  | 2.85   | DPQEQTVPVK                       |
|                                                   |                     |                   |          |                  |           | 2            | 12/18  | 2.368  | DLDFANDASK                       |
| Paladin                                           | P70261              | 96,740            | C        | 1                | 2         | 2            | 11/22  | 2.041  | RVLQKLTQDGLK                     |
| Paralemmin                                        | Q9Z0P4              | 41,614            | A        | 1                | 4         | 2            | 18/30  | 3.9605 | EIDVLEFGESAPAASK                 |
| Parathymosin                                      | Q9D0J8              | 11,430            | A        | 1                | 6         | 2            | 13/20  | 2.1221 | SVEAAAELSAK                      |
| Peroxin-5-related protein                         | Q8C437              | 63,135            | C        | 1                | 3         | 2            | 13/22  | 2.192  | SPVDSVLEGVK                      |
| Peroxi-redoxin-5, mitochondrial                   | P99029              | 21,897            | A        | 3                | 6         | 2            | 15/30  | 2.033  | GVLFVGPVGAFTPGCSK                |
|                                                   |                     |                   |          |                  |           | 2            | 17/32  | 2.7377 | VGDAIPSEVFEFEGEPK                |
|                                                   |                     |                   |          |                  |           | 2            | 15/20  | 2.5227 | LLADPTGAFGK                      |
|                                                   |                     |                   |          |                  |           | 3            | 26/100 | 3.6482 | DCVGPEVENACANPAAGTVILLENLR       |
| Phosphoglycerate kinase 1                         | P09411              | 44,550            | A        | 5                | 4         | 2            | 20/34  | 4.2138 | VLNNM*EIGTSLYDEEGAK              |
|                                                   |                     |                   |          |                  |           | 2            | 15/20  | 2.9922 | VLPVGDALSNV                      |
|                                                   |                     |                   |          |                  |           | 2            | 17/34  | 3.707  | ITLVPDFVTADKFDENAK               |
| Physophilin                                       | P51863              | 40,301            | A        | 2                | 4         | 2            | 22/24  | 3.6623 | LLFEGAGSNPGDK                    |
|                                                   |                     |                   |          |                  |           | 2            | 16/20  | 3.0475 | LYPEGLAQLAR                      |
|                                                   |                     |                   |          |                  |           | 2            | 13/16  | 2.7069 | LIHVEGCQR                        |
| Potassium-transporting ATPase alpha chain 2       | Q9Z1W8              | 114,726           | A        | 4                | 1         | 2            | 34/36  | 2.0147 | VAEIPFNSTNK                      |
|                                                   |                     |                   |          |                  |           | 2            | 16/24  | 2.8933 | VIM*VTGDHPITAK                   |
|                                                   |                     |                   |          |                  |           | 3            | 36/68  | 4.4437 | SAGIKVIM*VTGDHPITAK              |
|                                                   |                     |                   |          |                  |           | 2            | 17/28  | 3.748  | ILTSSEPEAAPAPR                   |
| ProSAAS                                           | Q9QXV0              | 27,270            | B        | 2                | 6         | 3            | 29/52  | 4.126  | ARAEAEAEQQAR                     |
|                                                   |                     |                   |          |                  |           | 2            | 19/22  | 3.534  | GEAAGAVQELAR                     |
|                                                   |                     |                   |          |                  |           | 2            | 17/24  | 2.651  | FDDGAGGDNEVQR                    |
| Proteasome 26S subunit ATPase 2                   | P46471              | 48,648            | C        | 1                | 3         | 2            | 15/20  | 2.41   | ALDEGDIALLK                      |
|                                                   |                     |                   |          |                  |           | 2            | 16/28  | 3.035  | VESTSVSGISPPGAK                  |
| Protein 4.1B                                      | Q9WV92              | 103,338           | B        | 1                | 4         | 2            | 16/28  | 3.035  | VESTSVSGISPPGAK                  |
| Protein KIAA1045                                  | Q80TL4              | 45,223            | A        | 1                | 3         | 2            | 17/22  | 4.0336 | ALTDEQEEQAAR                     |
|                                                   |                     |                   |          |                  |           | 3            | 16/68  | 2.523  | VLADLGVTPDKITNSGQR               |
| Protein kinase C inhibitor                        | P70349              | 13,777            | B        | 2                | 7         | 2            | 16/26  | 2.462  | AQVAQPGGDTIEFK                   |
| Protein NDRG2                                     | Q9QYG0              | 40,789            | A        | 1                | 4         | 2            | 22/26  | 3.5967 | TASLTSAAASIDGSR                  |
| Put. Eif-4A (aa 1-390)                            | P60843              | 46,154            | B        | 1                | 3         | 2            | 19/26  | 2.72   | GVDVIAQAQSGTGK                   |
| Putative adenosylhomocysteinase 3                 | Q68FL4              | 66,899            | A        | 1                | 2         | 2            | 39/40  | 2.2829 | TPELTWER                         |
| Putative tyrosine-protein phosphatase auxilin     | Q80TZ3              | 102,299           | A        | 1                | 1         | 2            | 15/22  | 2.2432 | AITVSPVFFNK                      |
| Pyridoxal kinase                                  | Q8K183              | 35,015            | A        | 2                | 4         | 2            | 24/40  | 4.2156 | VVPVADITPNQFEALLSGR              |
|                                                   |                     |                   |          |                  |           | 2            | 15/18  | 2.5652 | VLSIQSHVVR                       |
| Pyroline-5-carboxylate reductase                  | P54904              | 28,624            | B        | 1                | 6         | 2            | 15/20  | 2.625  | LGAQALLGAAK                      |
| Pyruvate dehydrogenase E1 component alpha subunit | P35486              | 43,232            | A        | 7                | 4         | 2            | 12/16  | 1.9717 | YGM*GTSVER                       |
|                                                   |                     |                   |          |                  |           | 3            | 20/52  | 3.0767 | YHGSM*SDPGVSYR                   |
|                                                   |                     |                   |          |                  |           | 3            | 38/132 | 5.2073 | EIEDAAQFATADPEPPEELGYHISSDPPFEVR |

| Protein                                              | Swiss-Prot acc. no. | protein mass (Da) | data set | matched peptides | slice no. | charge state | ions   | Xcorr  | assigned sequence                  |
|------------------------------------------------------|---------------------|-------------------|----------|------------------|-----------|--------------|--------|--------|------------------------------------|
|                                                      |                     |                   |          |                  |           | 3            | 36/132 | 4.8175 | EIEDAAQFATADPEPPLEELGYHIYSSDPPFEVR |
|                                                      |                     |                   |          |                  |           | 2            | 15/20  | 3.1778 | GPILM*ELQTYR                       |
|                                                      |                     |                   |          |                  |           | 2            | 15/16  | 2.3394 | AILAELTGR                          |
|                                                      |                     |                   |          |                  |           | 2            | 15/18  | 2.9167 | VDGM*DILCVR                        |
| Rab GDP dissociation inhibitor alpha                 | P50396              | 50,522            | A        | 2                | 4         | 2            | 23/36  | 4.3087 | SPYLYPLYGLGELPQGFAR                |
|                                                      |                     |                   |          |                  |           | 2            | 18/36  | 3.7278 | NPYYGESSSITPLEELYK                 |
|                                                      |                     |                   |          |                  |           | 2            | 18/28  | 3.7636 | TDDYLDQPCLLETINR                   |
| Rab GDP dissociation inhibitor beta                  | Q61598              | 50,537            | A        | 1                | 3         | 2            | 39/40  | 2.4656 | FVSISDLVFPK                        |
| Rab3 GDP/GTP exchange protein                        | Q80U28              | 175,180           | C        | 1                | 1         | 2            | 15/22  | 2.22   | SSNSSENQQFLK                       |
| Rab5c protein                                        | P35278              | 23,413            | B        | 2                | 5         | 2            | 17/22  | 2.328  | NEPQNAAGAPGR                       |
|                                                      |                     |                   |          |                  |           | 2            | 14/22  | 2.826  | GVDLQESNPASR                       |
| Ras association domain protein 1                     | Q99MK9              | 38,789            | C        | 1                | 5         | 2            | 10/16  | 2.014  | KFMVVDDPR                          |
| Ras homolog (Rheb)                                   | Q9ESR1              | 20,393            | C        | 1                | 5         | 2            | 10/18  | 2.045  | ENQTAVDVFK                         |
| Ras-related protein Rab-10                           | P61027              | 22,541            | C        | 2                | 5         | 3            | 20/44  | 2.709  | NIDEHANEDVER                       |
|                                                      |                     |                   |          |                  |           | 2            | 18/22  | 3.332  | NIDEHANEDVER                       |
| Ras-related protein Rab-3                            | P63011              | 24,970            | C        | 1                | 5         | 2            | 15/22  | 2.22   | SSNSSENQQFLK                       |
| Ras-related protein Rab-31                           | Q921E2              | 21,331            | C        | 1                | 5         | 2            | 14/18  | 2.811  | LGNQSLQASR                         |
| Ras-related protein Rab-3A                           | P63011              | 24,970            | A        | 1                | 5         | 2            | 19/30  | 4.585  | M*SESLDTADPAVTGAK                  |
| Ras-related protein Rab-5C                           | P35278              | 23,413            | C        | 2                | 5         | 2            | 17/22  | 3.584  | GVDLQESNPASR                       |
|                                                      |                     |                   |          |                  |           | 2            | 14/22  | 2.1    | GVDLQESNPASR                       |
| Ras-related protein Rap-1A                           | P62835              | 20,987            | B        | 1                | 5         | 2            | 12/18  | 2.084  | YDPTIEDSYR                         |
| Regulator of G-protein signaling 7                   | O54829              | 54,723            | B        | 1                | 3         | 2            | 16/20  | 2.514  | SSAYQELLQAK                        |
| Rho GDP-dissociation inhibitor 1                     | Q99PT1              | 23,407            | B        | 1                | 4         | 2            | 20/30  | 3.856  | VAVSADPNVNVIVTR                    |
| RTN1-C                                               | Q7M6W1              | 23,558            | A        | 1                | 6         | 2            | 39/43  | 2.3302 | SQAIDLLYWR                         |
| S-adenosyl homocysteine hydrolase                    | P50247              | 47,688            | C        | 1                | 5         | 2            | 13/14  | 2.135  | TPELTWER                           |
| SCG10-related protein hiat3, Stathmin-3              | O70166              | 20,954            | B        | 1                | 5         | 2            | 13/18  | 2.631  | ALEENNNFSR                         |
| Sec23                                                | Q01405              | 86,162            | C        | 1                | 3         | 2            | 13/22  | 2.822  | GPQVQQPPPSNR                       |
| Septin-10                                            | Q8C650              | 52,422            | A        | 1                | 3         | 2            | 39/42  | 2.4827 | VNIPLIAK                           |
| Serine/threonine protein phosphatase                 | Q3U7K1              | 37,033            | A        | 1                | 4         | 2            | 14/18  | 2.7041 | NVQLQENEIR                         |
| Serine/threonine protein phosphatase                 | Q9DBY2              | 37,217            | A        | 2                | 4         | 3            | 22/40  | 3.3456 | IKYPENFLLR                         |
|                                                      |                     |                   |          |                  |           | 2            | 14/18  | 2.4469 | IVQM*TEAEVR                        |
| Serine/threonine-protein kinase 2                    | Q60592              | 190,534           | C        | 1                | 1         | 2            | 14/20  | 2.1    | NIGALPVDMVR                        |
| Serum deprivation-response protein                   | Q63918              | 46,764            | C        | 1                | 4         | 2            | 14/16  | 2.78   | NGVELTATR                          |
|                                                      |                     |                   |          |                  |           | 2            | 13/18  | 2.005  | IVTSEEVIR                          |
| Sideroflexin 3                                       | Q91V61              | 35,406            | B        | 1                | 4         | 2            | 15/24  | 2.695  | NLLSGEQLEASR                       |
| SLIT-ROBO Rho GTPase-activating protein 1            | Q91Z69              | 121,430           | B        | 1                | 1         | 2            | 14/20  | 2.319  | GMADIDIQDDK                        |
| Sm D3                                                | P62320              | 13,916            | C        | 1                | 7         | 2            | 15/18  | 2.862  | VAQLEQVYIR                         |
| Sodium/potassium-transporting ATPase subunit alpha-4 | Q9WV27              | 114,816           | C        | 2                | 1         | 2            | 16/20  | 3.121  | LNIPVNVQVNP                        |
|                                                      |                     |                   |          |                  |           | 2            | 14/18  | 2.115  | TSATWFALSR                         |
| Sodium-dependent glutamate/aspartate transporter 2   | P43006              | 62,030            | A        | 2                | 4         | 2            | 21/28  | 4.2933 | NDEVSSLDNFLDLIR                    |
|                                                      |                     |                   |          |                  |           | 2            | 16/20  | 3.14   | SELDTIDSQHR                        |
| Spn3 protein                                         | Q68FM2              | 96,032            | A        | 4                | 1         | 2            | 13/12  | 1.5391 | QQQLPDGTGR                         |
|                                                      |                     |                   |          |                  |           | 2            | 13/14  | 2.0953 | SAVAWEER                           |
|                                                      |                     |                   |          |                  |           | 2            | 16/18  | 3.3276 | DLNAAEALQR                         |
|                                                      |                     |                   |          |                  |           | 2            | 39/40  | 1.538  | DVSSADLVK                          |
| STOP protein                                         | O55129              | 96,464            | B        | 1                | 2         | 2            | 16/28  | 2.892  | DPEGAGGAGVLAAGK                    |
| Succinate semialdehyde dehydrogenase, mitochondrial  | Q8BWF0              | 55,968            | A        | 2                | 4         | 3            | 29/116 | 4.089  | VSM*ELGGLAPFIVFDSANVDQAVAGAM*ASK   |
|                                                      |                     |                   |          |                  |           | 2            | 12/26  | 2.8028 | EVGEVLCTDPLVSK                     |
| Succinyl-coa:3-ketoacid-coenzyme A transferase 1     | Q9D0K2              | 55,989            | A        | 4                | 4         | 2            | 17/24  | 3.5353 | GM*GGAM*DLVSSSK                    |

| Protein                                                 | Swiss-Prot acc. no. | protein mass (Da) | data set | matched peptides | slice no. | charge state | ions   | Xcorr  | assigned sequence                             |
|---------------------------------------------------------|---------------------|-------------------|----------|------------------|-----------|--------------|--------|--------|-----------------------------------------------|
|                                                         |                     |                   |          |                  |           | 2            | 24/52  | 4.3724 | AGGAGVPAFYTSTGYGTLVQEGGSPIK                   |
|                                                         |                     |                   |          |                  |           | 2            | 26/40  | 4.9338 | DLTAVSNNAGVDNFGLLLR                           |
|                                                         |                     |                   |          |                  |           | 2            | 19/24  | 3.6097 | GM*GGAM*DLVSSK                                |
| Synaptic vesicle glycoprotein 2A                        | Q9JIS5              | 82,647            | A        | 1                | 1         | 2            | 14/18  | 2.2599 | HLQAVDYAAR                                    |
| Synaptophysin, Major synaptic vesicle protein p38       | Q62277              | 34,025            | A        | 1                | 4         | 3            | 24/48  | 3.4501 | LHQVYFDAPSCVK                                 |
| T-complex protein 1 subunit delta                       | P80315              | 58,066            | A        | 1                | 4         | 2            | 23/30  | 3.5078 | ALIAGGGAPEIELALR                              |
| T-complex protein 1 subunit epsilon                     | P80316              | 59,624            | C        | 1                | 3         | 2            | 17/18  | 3.853  | IADGYEQAAR                                    |
| T-complex protein 1 subunit zeta                        | P80317              | 58,004            | C        | 1                | 3         | 2            | 15/16  | 2.354  | SETDLSLR                                      |
| Thioesterase superfamily member 2; PNAS-27              | Q9CQR4              | 15,183            | B        | 1                | 1         | 2            | 19/22  | 3.074  | TLAFASVDLTNK                                  |
| Thy-1 membrane glycoprotein                             | P01831              | 18,080            | A        | 2                | 6         | 2            | 17/26  | 3.0398 | VTSLTACLVNQNLRL                               |
|                                                         |                     |                   |          |                  |           | 2            | 13/18  | 3.1013 | VTLSNQPYIK                                    |
| Trypsinogen 7                                           | Q9CPN9              | 26,422            | B        | 1                | 3         | 2            | 13/22  | 2.137  | YVNWIQQTIAAN                                  |
| TSC22-related inducible leucine zipper 2                | Q9EQN3              | 39,988            | B        | 1                | 5         | 2            | 17/22  | 2.708  | NAALEQENGLLR                                  |
| Tyrosine 3-monooxygenase/try. 5-monooxygenase activator | Q8BPH1              | 29,189            | A        | 2                | 6         | 2            | 13/20  | 2.4338 | EAAENSLVAYK                                   |
|                                                         |                     |                   |          |                  |           | 2            | 16/20  | 2.7155 | YLAEFATGNDR                                   |
| Ubiquinol-cytochrome-c reductase complex core protein 1 | Q9CZ13              | 52,769            | A        | 4                | 4         | 2            | 18/40  | 3.7366 | VVELLADIVQNSSEDSQIEK                          |
|                                                         |                     |                   |          |                  |           | 2            | 17/18  | 2.965  | IQEVDQM*LR                                    |
|                                                         |                     |                   |          |                  |           | 2            | 24/40  | 5.3877 | VVELLADIVQNSSEDSQIEK                          |
|                                                         |                     |                   |          |                  |           | 3            | 29/152 | 3.2915 | EM*QENDASM*QNVVFDYHLHATAFGTPLAQAVE<br>GPSENVR |
| Vesicle trafficking protein sec22b                      | O08547              | 24,741            | B        | 1                | 5         | 2            | 15/18  | 2.897  | DLQYQSQAK                                     |
| Vimentin                                                | P20152              | 53,688            | C        | 1                | 5         | 2            | 17/18  | 3.141  | FADLSEANR                                     |
| Voltage dependent anion channel 3                       | Q60931              | 30,753            | B        | 1                | 4         | 2            | 16/20  | 2.477  | LSQNNFALGYK                                   |
| Wrd43 protein                                           | Q68FC6              | 66,324            | B        | 1                | 4         | 2            | 13/18  | 2.019  | VFASLPQVER                                    |

### Supplemental Table 2: Proteins identified by LC-ESI-MS/MS and exclusive to wild-type mouse

**brain tissue samples, but appearing in only one data set.** This table lists proteins that were isolated by  $\alpha$ -bgtx beads of wild-type mouse brain tissue that are not present in knockout mouse samples. The columns indicate the SWISS-PROT accession number (acc. no), protein mass in Daltons (Da), whether the peptide was identified in data set A, B, or C (data set), the number of matched peptides, the gel slice from which the peptide originated, the charge state of the ion, the number of ions identified/the maximum number of ions, the Xcorr value, and the assigned amino acid sequence. Table 1 lists proteins that were identified in at least twice out of three data sets from  $\alpha$ -bgtx isolations of different mice. M\*, oxidized methionine residue.

Supplementary Table 3:

| protein name           | Swiss-Prot acc. no. | protein mass (Da) | data set | matched peptides                             |        | slice no. | sample | charge state | ions   | Xcorr         | assigned sequence  |                    |          |        |             |
|------------------------|---------------------|-------------------|----------|----------------------------------------------|--------|-----------|--------|--------------|--------|---------------|--------------------|--------------------|----------|--------|-------------|
|                        |                     |                   |          | ko                                           | wt     |           |        |              |        |               |                    |                    |          |        |             |
| 14-3-3 protein epsilon | P62259              | 29,174            | B        | 1                                            | 1      | 4         | ko     | 2            | 13/20  | 2.42          | YLAEFATGNDR        |                    |          |        |             |
|                        |                     |                   |          |                                              |        |           | wt     | 2            | 17/22  | 2.513         | HLIPAANTGESK       |                    |          |        |             |
|                        |                     |                   |          |                                              |        |           | ko     | 1            | 12/20  | 2.325         | EALQDVEDENQ        |                    |          |        |             |
|                        |                     |                   | C        | 3                                            | 1      | 4         | ko     | 2            | 15/20  | 2.611         | YLAEFATGNDR        |                    |          |        |             |
|                        |                     |                   |          |                                              |        |           | ko     | 2            | 16/20  | 3.074         | EALQDVEDENQ        |                    |          |        |             |
|                        |                     |                   |          |                                              |        |           | wt     | 2            | 17/22  | 3.839         | THEYLQPNPASR       |                    |          |        |             |
| 14-3-3 protein zeta    | P63101              | 27,771            | A        | 2                                            | 1      | 4         | ko     | 2            | 14/22  | 2.5122        | FLIPNASQPESK       |                    |          |        |             |
|                        |                     |                   |          |                                              |        |           | ko     | 2            | 21/26  | 4.7006        | SVTEQGAELSNEER     |                    |          |        |             |
|                        |                     |                   |          |                                              |        |           | wt     | 2            | 18/22  | 3.3398        | FLIPNASQPESK       |                    |          |        |             |
|                        |                     |                   |          | B                                            | 4      | 6         | 4      | ko           | 2      | 21/26         | 3.912              | SVTEQGAELSNEER     |          |        |             |
|                        |                     |                   |          |                                              |        |           |        | ko           | 2      | 21/26         | 4.875              | SVTEQGAELSNEER     |          |        |             |
|                        |                     |                   |          |                                              |        |           |        | ko           | 2      | 23/34         | 4.618              | GIVDQSQQAYQEAFEISK |          |        |             |
|                        |                     |                   |          |                                              |        |           | wt     | 2            | 15/20  | 2.055         | YLAEVAAGDDK        |                    |          |        |             |
|                        |                     |                   |          |                                              |        |           | wt     | 2            | 21/26  | 4.532         | SVTEQGAELSNEER     |                    |          |        |             |
|                        |                     |                   |          |                                              |        |           | wt     | 2            | 22/26  | 4.275         | SVTEQGAELSNEER     |                    |          |        |             |
|                        |                     |                   |          |                                              |        |           | wt     | 3            | 28/44  | 3.116         | YLAEVAAGDDKK       |                    |          |        |             |
|                        |                     |                   |          |                                              |        |           | wt     | 3            | 24/68  | 2.895         | GIVDQSQQAYQEAFEISK |                    |          |        |             |
|                        |                     |                   |          |                                              |        | wt        | 2      | 17/22        | 2.172  | FLIPNASQPESK  |                    |                    |          |        |             |
|                        |                     |                   |          |                                              |        | ko        | 2      | 16/22        | 2.263  | FLIPNASQPESK  |                    |                    |          |        |             |
|                        |                     |                   | C        | 5                                            | 3      | 4         | ko     | 1            | 10/26  | 2.208         | SVTEQGAELSNEER     |                    |          |        |             |
|                        |                     |                   |          |                                              |        |           | ko     | 2            | 19/22  | 3.542         | YLAEVAAGDDKK       |                    |          |        |             |
|                        |                     |                   |          |                                              |        |           | ko     | 2            | 21/26  | 4.773         | SVTEQGAELSNEER     |                    |          |        |             |
|                        |                     |                   |          |                                              |        |           | ko     | 2            | 20/26  | 4.046         | SVTEQGAELSNEER     |                    |          |        |             |
|                        |                     |                   |          |                                              |        |           | ko     | 2            | 18/22  | 2.244         | FLIPNASQPESK       |                    |          |        |             |
|                        |                     |                   |          |                                              |        |           | wt     | 2            | 21/26  | 4.759         | SVTEQGAELSNEER     |                    |          |        |             |
|                        |                     |                   |          |                                              |        |           | wt     | 3            | 28/52  | 3.858         | SVTEQGAELSNEER     |                    |          |        |             |
|                        |                     |                   |          |                                              |        |           | wt     | 2            | 18/22  | 2.4           | FLIPNASQPESK       |                    |          |        |             |
|                        |                     |                   |          | 2',3'-cyclic-nucleotide 3'-phosphodiesterase | P16330 | 47,123    | A      | 1            | 1      | 3             | ko                 | 2                  | 14/20    | 2.7096 | LSISALFVTPK |
|                        |                     |                   |          |                                              |        |           |        |              | 0      | 8             | 4                  | wt                 | 2        | 12/16  | 1.9337      |
|                        |                     |                   |          |                                              |        |           |        | wt           | 2      | 12/16         | 2.5024             | HFISGDEPK          |          |        |             |
|                        |                     |                   |          |                                              |        |           |        | wt           | 2      | 16/20         | 3.1856             | VLVLDDTNHER        |          |        |             |
|                        |                     |                   | wt       |                                              |        |           |        | 2            | 14/20  | 3.0872        | LSISALFVTPK        |                    |          |        |             |
|                        |                     |                   | wt       |                                              |        |           |        | 2            | 17/24  | 2.8431        | GGSQGEAVGELPR      |                    |          |        |             |
|                        |                     |                   | wt       |                                              |        |           |        | 2            | 17/24  | 2.8431        | GGSQGEAVGELPR      |                    |          |        |             |
|                        |                     |                   | wt       |                                              |        |           |        | 2            | 19/24  | 4.4537        | GGSQGEAVGELPR      |                    |          |        |             |
|                        |                     |                   | wt       |                                              |        |           |        | 2            | 19/26  | 4.2986        | AAGAEYYAQQEVVK     |                    |          |        |             |
|                        |                     |                   | wt       |                                              |        |           | 2      | 16/20        | 2.5144 | VQVTSQEYSAR   |                    |                    |          |        |             |
| B                      | 1                   | 0                 | 4        |                                              |        |           | wt     | 2            | 13/24  | 2.501         | GGSQGEAVGELPR      |                    |          |        |             |
|                        | C                   | 6                 | 7        |                                              |        |           | 4      | ko           | 1      | 10/16         | 1.808              | AIFTGYYGK          |          |        |             |
|                        |                     |                   | 6        |                                              |        |           | 4      | 3            | ko     | 1             | 9/14               | 1.637              | ADFSEAYK |        |             |
|                        |                     |                   |          |                                              |        |           | ko     | 2            | 14/24  | 2.795         | GGSQGEAVGELPR      |                    |          |        |             |
|                        |                     |                   | ko       |                                              |        |           | 2      | 19/24        | 3.612  | GGSQGEAVGELPR |                    |                    |          |        |             |
|                        |                     |                   | ko       |                                              |        |           | 2      | 13/14        | 2.02   | ADFSEAYK      |                    |                    |          |        |             |
|                        |                     |                   | ko       |                                              |        |           | 2      | 18/24        | 3.99   | GGSQGEAVGELPR |                    |                    |          |        |             |

| protein name                                   | Swiss-Prot acc. no. | protein mass (Da) | data set | matched peptides |    | slice no. | sample | charge state | ions  | Xcorr  | assigned sequence |
|------------------------------------------------|---------------------|-------------------|----------|------------------|----|-----------|--------|--------------|-------|--------|-------------------|
|                                                |                     |                   |          | ko               | wt |           |        |              |       |        |                   |
|                                                |                     |                   |          |                  |    |           | ko     | 2            | 13/16 | 2.598  | HFISGDEPK         |
|                                                |                     |                   |          |                  |    |           | ko     | 2            | 14/16 | 2.889  | LELVSYFGK         |
|                                                |                     |                   |          |                  |    |           | ko     | 2            | 13/16 | 2.271  | ADFSEAYKR         |
|                                                |                     |                   |          |                  |    |           | ko     | 2            | 20/28 | 4.215  | AAGAEYYAQQEVVKR   |
|                                                |                     |                   |          |                  |    |           | ko     | 2            | 20/26 | 4.303  | AAGAEYYAQQEVVK    |
|                                                |                     |                   |          |                  |    |           | ko     | 1            | 9/14  | 1.565  | MVSADAYK          |
|                                                |                     |                   |          |                  |    |           | wt     | 2            | 15/20 | 2.995  | VLVLDLDTNHER      |
|                                                |                     |                   |          |                  |    |           | wt     | 1            | 9/16  | 1.525  | AIFTGYYGK         |
|                                                |                     |                   |          |                  |    |           | wt     | 2            | 16/20 | 3.299  | NQWQLSADDLK       |
|                                                |                     |                   |          |                  |    |           | wt     | 1            | 9/14  | 1.562  | ADFSEAYK          |
|                                                |                     |                   |          |                  |    |           | wt     | 2            | 9/16  | 2.143  | HFISGDEPK         |
|                                                |                     |                   |          |                  |    |           | wt     | 2            | 19/24 | 3.589  | GGSQGEAVGELPR     |
|                                                |                     |                   |          |                  |    |           | wt     | 2            | 18/24 | 3.665  | GGSQGEAVGELPR     |
|                                                |                     |                   |          |                  |    |           | wt     | 2            | 18/24 | 3.429  | GGSQGEAVGELPR     |
|                                                |                     |                   |          |                  |    |           | wt     | 2            | 13/16 | 2.541  | HFISGDEPK         |
|                                                |                     |                   |          |                  |    |           | wt     | 2            | 12/16 | 2.069  | ADFSEAYKR         |
|                                                |                     |                   |          |                  |    |           | wt     | 2            | 20/26 | 4.397  | AAGAEYYAQQEVVK    |
| 2410014A08Rik protein                          | Q6ZQI3              | 32,342            | B        | 2                | 1  | 3         | ko     | 2            | 17/22 | 2.544  | FAEVYFAQSQK       |
|                                                |                     |                   |          |                  |    |           | ko     | 2            | 17/24 | 3.182  | STPEDQILYQTER     |
|                                                |                     |                   |          |                  |    |           | wt     | 2            | 18/24 | 3.484  | STPEDQILYQTER     |
| 3-methylcrotonyl-coa carboxylase alpha subunit | Q99MR8              | 79,344            | C        | 4                | 4  | 2         | ko     | 2            | 13/28 | 3.123  | IIEEAPAGINPEVR    |
|                                                |                     |                   |          |                  |    |           | ko     | 2            | 16/20 | 2.595  | VFFSEGAQANR       |
|                                                |                     |                   |          |                  |    |           | ko     | 2            | 16/20 | 3.394  | DGSYDMQIDNK       |
|                                                |                     |                   |          |                  |    |           | ko     | 3            | 27/52 | 4.332  | HAPLVEFEEEEESDK   |
|                                                |                     |                   |          |                  |    |           | wt     | 2            | 16/20 | 2.935  | VFFSEGAQANR       |
|                                                |                     |                   |          |                  |    |           | wt     | 2            | 16/20 | 3.091  | DGSYDMQIDNK       |
|                                                |                     |                   |          |                  |    |           | wt     | 2            | 21/28 | 3.473  | IIEEAPAGINPEVR    |
|                                                |                     |                   |          |                  |    |           | wt     | 3            | 27/56 | 3.888  | IIEEAPAGINPEVR    |
| 6-phosphofruktokinase type C                   | Q9WUA3              | 85,455            | A        | 1                | 1  | 1         | ko     | 2            | 16/20 | 2.6005 | DLLFPQVAELK       |
|                                                |                     |                   |          |                  |    |           | wt     | 2            | 16/20 | 3.1776 |                   |
| Acetyl-CoA acetyltransferase                   | Q8QZT1              | 44,816            | A        | 1                | 1  | 3         | ko     | 2            | 23/28 | 4.3949 | TAIAIEGIPEALTR    |
|                                                |                     |                   |          |                  |    |           | wt     | 2            | 22/28 | 4.5177 | TAIAIEGIPEALTR    |
|                                                |                     |                   | B        | 0                | 1  | 3         | wt     | 2            | 18/32 | 3.255  | TPIGSFLGLASQPATK  |
|                                                |                     |                   | C        | 1                | 3  | 3         | ko     | 2            | 19/24 | 3.184  | QEQDTYALSSYTR     |
|                                                |                     |                   |          |                  |    |           | wt     | 2            | 14/24 | 2.734  | FASEITPITISVK     |
|                                                |                     |                   |          |                  |    |           | wt     | 2            | 20/22 | 2.993  | LGTAAIQGAIEK      |
|                                                |                     |                   |          |                  |    |           | wt     | 2            | 20/24 | 3.217  | QEQDTYALSSYTR     |
| Aconitate hydratase                            | Q99KI0              | 85,464            | A        | 2                | 2  | 1         | ko     | 2            | 17/28 | 3.5825 | NAVVTQEFQVPPDTAR  |
|                                                |                     |                   |          |                  |    |           | ko     | 3            | 24/48 | 3.1416 | ATIERDGYAQILR     |
|                                                |                     |                   |          |                  |    |           | wt     | 2            | 16/24 | 2.8919 | ATIERDGYAQILR     |
|                                                |                     |                   |          |                  |    |           | wt     | 2            | 22/28 | 3.7066 | NAVVTQEFQVPPDTAR  |
|                                                |                     |                   | C        | 3                | 4  | 1         | ko     | 2            | 20/28 | 3.835  | WVVGIDENYEGGSSR   |
|                                                |                     |                   |          |                  |    |           | ko     | 2            | 19/24 | 3.41   | SQFTITPGSEQIR     |

| protein name                 | Swiss-Prot acc. no. | protein mass (Da) | data set | matched peptides |    | slice no. | sample | charge state | ions  | Xcorr  | assigned sequence   |
|------------------------------|---------------------|-------------------|----------|------------------|----|-----------|--------|--------------|-------|--------|---------------------|
|                              |                     |                   |          | ko               | wt |           |        |              |       |        |                     |
|                              |                     |                   |          |                  |    |           | ko     | 3            | 28/60 | 4.257  | IVYGHLDPPANQEIER    |
|                              |                     |                   |          |                  |    |           | wt     | 2            | 12/16 | 2.254  | NTIVTSYNR           |
|                              |                     |                   |          |                  |    |           | wt     | 2            | 24/28 | 4.352  | NAVITQEFQVPTAR      |
|                              |                     |                   |          |                  |    |           | wt     | 2            | 20/24 | 3.379  | SQFTITPGSEQIR       |
|                              |                     |                   |          |                  |    |           | wt     | 3            | 27/60 | 4.06   | IVYGHLDPPANQEIER    |
| Alpha actinin 4              | P57780              | 104,977           | B        | 1                | 1  | 1         | ko     | 2            | 20/30 | 3.267  | ETDITDADQVIASFK     |
|                              |                     |                   |          |                  |    |           | wt     | 2            | 18/30 | 3.274  | ETDITDADQVIASFK     |
| Alpha-actin-2                | P62737              | 42,009            | B        | 2                | 3  | 4         | ko     | 2            | 18/22 | 3.676  | TINEVENQILTR        |
|                              |                     |                   |          |                  |    |           | ko     | 2            | 19/22 | 2.893  | TINEVENQILTR        |
|                              |                     |                   |          |                  |    |           | wt     | 2            | 22/26 | 3.617  | FAIQDISVEETSAK      |
|                              |                     |                   |          |                  |    |           | wt     | 2            | 19/22 | 2.893  | TINEVENQILTR        |
|                              |                     |                   |          |                  |    |           | wt     | 2            | 22/26 | 3.617  | FAIQDISVEETSAK      |
| Alpha-actinin-1              | Q7TPR4              | 103,068           | A        | 1                | 1  | 3         | ko     | 2            | 18/22 | 4.3998 | VGWEQLLTTIAR        |
|                              |                     |                   |          |                  |    |           | wt     | 2            | 18/22 | 3.6671 | TINEVENQILTR        |
| Annexin II                   | P07356              | 38,676            | B        | 5                | 7  | 4         | ko     | 2            | 13/18 | 3.032  | TNQLQEINR           |
|                              |                     |                   |          |                  |    |           | ko     | 2            | 16/20 | 2.56   | SLYYYIQDQTK         |
|                              |                     |                   |          |                  |    |           | ko     | 2            | 17/20 | 3.001  | TPAQYDASELK         |
|                              |                     |                   |          |                  |    |           | ko     | 2            | 16/20 | 3.267  | TPAQYDASELK         |
|                              |                     |                   |          |                  |    |           | ko     | 2            | 20/32 | 4.32   | AEDGSVIDYELIDQDAR   |
|                              |                     |                   |          |                  |    |           | wt     | 2            | 14/18 | 3.009  | TNQLQEINR           |
|                              |                     |                   |          |                  |    |           | wt     | 2            | 15/18 | 3.287  | TNQLQEINR           |
|                              |                     |                   |          |                  |    |           | wt     | 2            | 16/20 | 2.852  | SLYYYIQDQTK         |
|                              |                     |                   |          |                  |    |           | wt     | 2            | 15/20 | 2.59   | TPAQYDASELK         |
|                              |                     |                   |          |                  |    |           | wt     | 2            | 18/20 | 2.717  | TPAQYDASELK         |
|                              |                     |                   |          |                  |    |           | wt     | 2            | 14/20 | 2.673  | TPAQYDASELK         |
|                              |                     |                   |          |                  |    |           | wt     | 2            | 15/20 | 2.864  | TPAQYDASELK         |
|                              |                     |                   | C        | 1                | 1  | 4         | ko     | 2            | 16/20 | 3.188  | TPAQYDASELK         |
|                              |                     |                   |          |                  |    |           | wt     | 2            | 12/20 | 2.598  | TPAQYDASELK         |
| AP-2 complex subunit alpha-1 | P17426              | 107,664           | A        | 1                | 2  | 1         | ko     | 2            | 15/18 | 2.3493 | GLAVFISDIR          |
|                              |                     |                   |          |                  |    |           | wt     | 2            | 16/18 | 3.3595 | GLAVFISDIR          |
|                              |                     |                   |          |                  |    |           | wt     | 2            | 16/18 | 3.3595 | GLAVFISDIR          |
|                              |                     |                   | B        | 2                | 6  | 1         | ko     | 2            | 16/20 | 2.896  | LVECLETVLNK         |
|                              |                     |                   |          |                  |    |           | ko     | 2            | 16/18 | 3.714  | GLAVFISDIR          |
|                              |                     |                   |          |                  |    |           | wt     | 2            | 25/36 | 4.665  | QGAIVAVTGDGVNDSPALK |
|                              |                     |                   |          |                  |    |           | wt     | 2            | 24/34 | 4.066  | NLEAVETLGGSTSTICSDK |
|                              |                     |                   |          |                  |    |           | wt     | 2            | 14/16 | 2.421  | ALLLSTYIK           |
|                              |                     |                   |          |                  |    |           | wt     | 2            | 16/22 | 2.34   | GPGAASALDDSR        |
|                              |                     |                   |          |                  |    |           | wt     | 2            | 15/16 | 2.021  | DDVQGYAAK           |
|                              |                     |                   |          |                  |    |           | wt     | 2            | 16/20 | 2.608  | QLSLPLQEAQK         |
| Aspartate aminotransferase   | P05202              | 47,411            | C        | 2                | 4  | 4         | ko     | 2            | 14/22 | 2.078  | IAATILTSPDLR        |
|                              |                     |                   |          | 4                | 5  | 3         | ko     | 2            | 15/22 | 2.767  | PLYSNPPLNGAR        |
|                              |                     |                   |          |                  |    |           | ko     | 2            | 14/16 | 2.63   | MNLGVGAYR           |

| protein name               | Swiss-Prot acc. no. | protein mass (Da) | data set | matched peptides |    | slice no. | sample | charge state | ions  | Xcorr  | assigned sequence  |
|----------------------------|---------------------|-------------------|----------|------------------|----|-----------|--------|--------------|-------|--------|--------------------|
|                            |                     |                   |          | ko               | wt |           |        |              |       |        |                    |
|                            |                     |                   |          |                  |    |           | ko     | 2            | 16/26 | 3.783  | FVTVQTISGTGALR     |
|                            |                     |                   |          |                  |    |           | ko     | 2            | 16/18 | 3.709  | DAGMQLQGYR         |
|                            |                     |                   |          |                  |    |           | ko     | 2            | 17/22 | 3.48   | IAATILTSPDLR       |
|                            |                     |                   |          |                  |    |           | wt     | 2            | 13/14 | 2.147  | NMGLYGER           |
|                            |                     |                   |          |                  |    |           | wt     | 2            | 21/28 | 4.25   | ASAEALGENNEVLK     |
|                            |                     |                   |          |                  |    |           | wt     | 2            | 19/26 | 3.881  | FVTVQTISGTGALR     |
|                            |                     |                   |          |                  |    |           | wt     | 2            | 15/16 | 2.596  | MNLGVGAYR          |
|                            |                     |                   |          |                  |    |           | wt     | 2            | 13/22 | 2.196  | IAATILTSPDLR       |
|                            |                     |                   |          |                  |    |           | wt     | 2            | 16/18 | 3.271  | DAGMQLQGYR         |
|                            |                     |                   |          |                  |    |           | wt     | 2            | 19/22 | 3.559  | IAATILTSPDLR       |
|                            |                     |                   |          |                  |    |           | wt     | 2            | 12/24 | 2.354  | IVAATLSDPELFK      |
|                            |                     |                   |          |                  |    |           | wt     | 2            | 15/16 | 3.229  | VGNLTVVGK          |
|                            |                     |                   |          |                  |    |           | wt     | 2            | 17/20 | 2.942  | LVLGDNSPAIR        |
| ATP synthase subunit alpha | Q03265              | 59,753            | A        | 3                | 2  | 3         | ko     | 2            | 20/30 | 3.714  | TGAIVDVPVGEELLGR   |
|                            |                     |                   |          | 2                | 3  | 4         | ko     | 2            | 14/18 | 2.4023 | VLSIGDGIAR         |
|                            |                     |                   |          |                  |    |           | ko     | 2            | 15/18 | 3.0483 | AVDSLVPIGR         |
|                            |                     |                   |          |                  |    |           | ko     | 2            | 17/34 | 3.1043 | VVDALGNAIDGKGPIGSK |
|                            |                     |                   |          |                  |    |           | ko     | 2            | 17/28 | 3.6017 | ILGADTSVDLEETGR    |
|                            |                     |                   |          |                  |    |           | wt     | 2            | 17/22 | 3.1634 | TSIAIDIINQK        |
|                            |                     |                   |          |                  |    |           | wt     | 2            | 15/30 | 2.2425 | TGAIVDVPVGEELLGR   |
|                            |                     |                   |          |                  |    |           | wt     | 2            | 22/30 | 4.1809 | TGAIVDVPVGEELLGR   |
|                            |                     |                   |          |                  |    |           | wt     | 2            | 14/18 | 3.2646 | AVDSLVPIGR         |
|                            |                     |                   |          |                  |    |           | wt     | 3            | 26/68 | 3.1879 | VVDALGNAIDGKGPIGSK |
|                            |                     |                   | B        | 3                | 5  | 3         | ko     | 2            | 17/20 | 2.943  | HALIYDDLK          |
|                            |                     |                   |          |                  |    |           | ko     | 2            | 20/22 | 3.085  | VVDALGNAIDGK       |
|                            |                     |                   |          |                  |    |           | ko     | 2            | 23/28 | 4.119  | ILGADTSVDLEETGR    |
|                            |                     |                   |          |                  |    |           | wt     | 2            | 17/22 | 2.466  | VVDALGNAIDGK       |
|                            |                     |                   |          |                  |    |           | wt     | 2            | 14/20 | 2.27   | HALIYDDLK          |
|                            |                     |                   |          |                  |    |           | wt     | 2            | 13/18 | 2.404  | AVDSLVPIGR         |
|                            |                     |                   |          |                  |    |           | wt     | 2            | 18/20 | 2.824  | HALIYDDLK          |
|                            |                     |                   |          |                  |    |           | wt     | 2            | 15/20 | 2.626  | HALIYDDLK          |
|                            |                     |                   | C        | 16               | 20 | 3         | ko     | 2            | 13/20 | 2.161  | IVEIPFNSTNK        |
|                            |                     |                   |          |                  |    |           | ko     | 2            | 14/20 | 2.055  | NMVPQALVIR         |
|                            |                     |                   |          |                  |    |           | ko     | 2            | 13/16 | 2.349  | NSVFQGMK           |
|                            |                     |                   |          |                  |    |           | ko     | 2            | 14/16 | 2.573  | NSVFQGMK           |
|                            |                     |                   |          |                  |    |           | ko     | 2            | 19/24 | 2.693  | AVAGDASESALLK      |
|                            |                     |                   |          |                  |    |           | ko     | 2            | 15/20 | 2.438  | NMVPQALVIR         |
|                            |                     |                   |          |                  |    |           | ko     | 2            | 16/20 | 2.989  | LNIPVSQVNPR        |
|                            |                     |                   |          |                  |    |           | ko     | 2            | 18/24 | 2.47   | AVAGDASESALLK      |
|                            |                     |                   |          |                  |    |           | ko     | 2            | 23/28 | 4.161  | VDNSSLTGESEPPQTR   |
|                            |                     |                   |          |                  |    |           | ko     | 2            | 21/28 | 4.459  | VDNSSLTGESEPPQTR   |
|                            |                     |                   |          |                  |    |           | ko     | 2            | 16/24 | 3.311  | SPDFTNENPLETR      |
|                            |                     |                   |          |                  |    |           | ko     | 2            | 18/24 | 4.203  | SPDFTNENPLETR      |
|                            |                     |                   |          |                  |    |           | ko     | 2            | 13/34 | 2.445  | GVGISEGNETVEDIAAR  |
|                            |                     |                   |          |                  |    |           | ko     | 2            | 20/28 | 4.359  | VDNSSLTGESEPPQTR   |
|                            |                     |                   |          |                  |    |           | ko     | 2            | 23/34 | 4.424  | GVGISEGNETVEDIAAR  |
|                            |                     |                   |          |                  |    |           | ko     | 3            | 23/40 | 3.564  | LNIPVSQVNPR        |

| protein name              | Swiss-Prot<br>acc. no. | protein<br>mass<br>(Da) | data<br>set | matched<br>peptides |    | slice<br>no. | sample | charge<br>state | ions  | Xcorr  | assigned sequence   |
|---------------------------|------------------------|-------------------------|-------------|---------------------|----|--------------|--------|-----------------|-------|--------|---------------------|
|                           |                        |                         |             | ko                  | wt |              |        |                 |       |        |                     |
|                           |                        |                         |             |                     |    |              | wt     | 2               | 14/16 | 2.505  | NSVFQQGMK           |
|                           |                        |                         |             |                     |    |              | wt     | 2               | 14/16 | 2.411  | NSVFQQGMK           |
|                           |                        |                         |             |                     |    |              | wt     | 2               | 20/28 | 4.082  | VDNSSLTGESEPPQTR    |
|                           |                        |                         |             |                     |    |              | wt     | 2               | 16/20 | 2.987  | LNIPVSQVNPR         |
|                           |                        |                         |             |                     |    |              | wt     | 2               | 22/28 | 4.411  | VDNSSLTGESEPPQTR    |
|                           |                        |                         |             |                     |    |              | wt     | 2               | 21/28 | 3.679  | VDNSSLTGESEPPQTR    |
|                           |                        |                         |             |                     |    |              | wt     | 2               | 20/24 | 2.968  | AVAGDASESALLK       |
|                           |                        |                         |             |                     |    |              | wt     | 2               | 18/24 | 3.154  | SPDFTNENPLETR       |
|                           |                        |                         |             |                     |    |              | wt     | 2               | 19/24 | 3.325  | SPDFTNENPLETR       |
|                           |                        |                         |             |                     |    |              | wt     | 2               | 18/24 | 3.537  | SPDFTNENPLETR       |
|                           |                        |                         |             |                     |    |              | wt     | 2               | 22/34 | 4.527  | GVGIHSEGNETVEDIAAR  |
|                           |                        |                         |             |                     |    |              | wt     | 2               | 24/34 | 4.157  | GVGIHSEGNETVEDIAAR  |
|                           |                        |                         |             |                     |    |              | wt     | 2               | 16/24 | 3.32   | SPDFTNENPLETR       |
|                           |                        |                         |             |                     |    |              | wt     | 2               | 21/34 | 4.226  | GVGIHSEGNETVEDIAAR  |
|                           |                        |                         |             |                     |    |              | wt     | 2               | 19/24 | 3.53   | AVAGDASESALLK       |
|                           |                        |                         |             |                     |    |              | wt     | 2               | 26/34 | 5.195  | GVGIHSEGNETVEDIAAR  |
|                           |                        |                         |             |                     |    |              | wt     | 3               | 23/40 | 3.709  | LNIPVSQVNPR         |
|                           |                        |                         |             |                     |    |              | wt     | 3               | 29/68 | 3.196  | GVGIHSEGNETVEDIAAR  |
|                           |                        |                         |             |                     |    |              | wt     | 3               | 26/56 | 3.866  | VDNSSLTGESEPPQTR    |
|                           |                        |                         |             |                     |    |              | wt     | 3               | 29/68 | 4.124  | GVGIHSEGNETVEDIAAR  |
| ATP synthase subunit beta | P56480                 | 56,300                  | A           | 3                   | 2  | 3            | ko     | 2               | 12/20 | 2.17   | IGLFGGAGVGK         |
|                           |                        |                         |             | 3                   | 3  | 4            | ko     | 2               | 11/28 | 1.8327 | VALVYQGM*NEPPGAR    |
|                           |                        |                         |             |                     |    |              | ko     | 2               | 17/24 | 2.796  | TVLIM*ELINNVAK      |
|                           |                        |                         |             |                     |    |              | ko     | 2               | 17/24 | 2.796  | TVLIM*ELINNVAK      |
|                           |                        |                         |             |                     |    |              | ko     | 2               | 18/36 | 4.0956 | AIAELGIYPAVDPLDSTSR |
|                           |                        |                         |             |                     |    |              | ko     | 2               | 18/26 | 4.0098 | FTQAGSEVSALLGR      |
|                           |                        |                         |             |                     |    |              | wt     | 2               | 16/20 | 3.0315 | IGLFGGAGVGK         |
|                           |                        |                         |             |                     |    |              | wt     | 2               | 19/24 | 3.4203 | TVLIM*ELINNVAK      |
|                           |                        |                         |             |                     |    |              | wt     | 2               | 21/28 | 3.8064 | VALVYQGM*NEPPGAR    |
|                           |                        |                         |             |                     |    |              | wt     | 2               | 20/26 | 4.1493 | FTQAGSEVSALLGR      |
|                           |                        |                         |             |                     |    |              | wt     | 3               | 35/72 | 4.5639 | VLDSGAPIKIPVGPETLGR |
| Beta actin                | P60710                 | 41,737                  | B           | 0                   | 1  | 3            | ko     | 3               | 21/48 | 2.7    | QEYDESGPSIVHR       |
|                           |                        |                         |             | 1                   | 3  | 4            | wt     | 3               | 20/48 | 2.685  | QEYDESGPSIVHR       |
|                           |                        |                         |             |                     |    |              | wt     | 3               | 24/52 | 3.035  | QEYDESGPSIVHRK      |
|                           |                        |                         |             |                     |    |              | wt     | 3               | 25/48 | 3.487  | QEYDESGPSIVHR       |
|                           |                        |                         |             |                     |    |              | wt     | 3               | 22/48 | 2.694  | QEYDESGPSIVHR       |
|                           |                        |                         | C           | 5                   | 4  | 4            | ko     | 2               | 16/24 | 2.458  | QEYDESGPSIVHR       |
|                           |                        |                         |             |                     |    |              | ko     | 2               | 14/24 | 2.344  | QEYDESGPSIVHR       |
|                           |                        |                         |             |                     |    |              | ko     | 3               | 25/48 | 2.968  | QEYDESGPSIVHR       |
|                           |                        |                         |             |                     |    |              | ko     | 3               | 26/48 | 3.113  | QEYDESGPSIVHR       |
|                           |                        |                         |             |                     |    |              | ko     | 3               | 24/48 | 3.606  | QEYDESGPSIVHR       |
|                           |                        |                         |             |                     |    |              | wt     | 3               | 22/48 | 2.704  | QEYDESGPSIVHR       |
|                           |                        |                         |             |                     |    |              | wt     | 3               | 24/48 | 3.135  | QEYDESGPSIVHR       |
|                           |                        |                         |             |                     |    |              | wt     | 3               | 26/48 | 3.246  | QEYDESGPSIVHR       |
|                           |                        |                         |             |                     |    |              | wt     | 3               | 26/48 | 3.396  | QEYDESGPSIVHR       |



| protein name                                           | Swiss-Prot acc. no. | protein mass (Da) | data set | matched peptides |       | slice no. | sample        | charge state  | ions          | Xcorr  | assigned sequence   |              |
|--------------------------------------------------------|---------------------|-------------------|----------|------------------|-------|-----------|---------------|---------------|---------------|--------|---------------------|--------------|
|                                                        |                     |                   |          | ko               | wt    |           |               |               |               |        |                     |              |
| Beta-1-globin                                          | P02089              | 15,878            | B        | 0                | 2     | 6         | ko            | 2             | 17/22         | 2.51   | DFTPAAQAAFQK        |              |
|                                                        |                     |                   |          |                  |       |           | ko            | 2             | 18/22         | 2.586  | DFTPAAQAAFQK        |              |
|                                                        |                     |                   |          | wt               | 2     | 17/20     | 2.734         | LIWDSYTTNK    |               |        |                     |              |
|                                                        |                     |                   |          | wt               | 2     | 15/24     | 2.64          | VNPDEVGGEALGR |               |        |                     |              |
|                                                        |                     |                   |          | wt               | 2     | 18/24     | 3.36          | VNPDEVGGEALGR |               |        |                     |              |
|                                                        |                     |                   |          | wt               | 2     | 13/24     | 2.749         | GTFASLSELHCDK |               |        |                     |              |
|                                                        |                     |                   |          | wt               | 2     | 17/22     | 2.863         | DFTPAAQAAFQK  |               |        |                     |              |
|                                                        |                     |                   |          | C                | 3     | 1         | 6             | ko            | 1             | 12/22  | 2.53                | DFTPAAQAAFQK |
|                                                        |                     |                   |          |                  |       |           |               | ko            | 1             | 14/22  | 2.948               | DFTPAAQAAFQK |
|                                                        |                     |                   |          |                  | 7     | 5         | 7             | ko            | 2             | 12/16  | 2.137               | AAVSLWGK     |
|                                                        |                     |                   |          |                  |       |           |               | ko            | 2             | 17/22  | 2.802               | DFTPAAQAAFQK |
|                                                        |                     |                   |          |                  | ko    | 2         | 15/24         | 2.91          | VNPDEVGGEALGR |        |                     |              |
|                                                        |                     |                   | ko       |                  | 2     | 15/22     | 2.466         | DFTPAAQAAFQK  |               |        |                     |              |
|                                                        |                     |                   | ko       |                  | 2     | 18/24     | 4.262         | VNPDEVGGEALGR |               |        |                     |              |
|                                                        |                     |                   | ko       |                  | 2     | 16/24     | 3.067         | VNVEEVGGEALGR |               |        |                     |              |
|                                                        |                     |                   | ko       |                  | 2     | 13/24     | 2.62          | VNVEEVGGEALGR |               |        |                     |              |
|                                                        |                     |                   | ko       |                  | 2     | 16/24     | 3.176         | VNVEEVGGEALGR |               |        |                     |              |
|                                                        |                     |                   | wt       |                  | 2     | 13/24     | 2.783         | VNPDEVGGEALGR |               |        |                     |              |
|                                                        |                     |                   | wt       | 2                | 15/24 | 3.447     | VNPDEVGGEALGR |               |               |        |                     |              |
|                                                        |                     |                   | wt       | 2                | 18/22 | 3.116     | DFTPAAQAAFQK  |               |               |        |                     |              |
|                                                        |                     |                   | wt       | 2                | 18/22 | 3.239     | DFTPAAQAAFQK  |               |               |        |                     |              |
|                                                        |                     |                   | wt       | 2                | 15/24 | 3.548     | VNVEEVGGEALGR |               |               |        |                     |              |
|                                                        |                     |                   | wt       | 2                | 18/24 | 3.614     | VNVEEVGGEALGR |               |               |        |                     |              |
| Beta-synuclein                                         | Q91ZZ3              | 14,052            | C        | 1                | 1     | 6         | ko            | 2             | 20/26         | 4.068  | TSGVVQGVASVAEK      |              |
|                                                        |                     |                   |          |                  |       |           | wt            | 2             | 20/26         | 4.174  | TSGVVQGVASVAEK      |              |
| Calcium/calmodulin-dependent protein kinase II alpha   | P11798              | 54,115            | A        | 3                | 4     | 3         | ko            | 2             | 15/20         | 2.9109 | GAILTM*LATR         |              |
|                                                        |                     |                   |          |                  |       |           | ko            | 2             | 20/22         | 3.9948 | ITQYLDAGGIPR        |              |
|                                                        |                     |                   |          |                  |       |           | ko            | 2             | 16/22         | 2.9143 | DLKPENLLASK         |              |
|                                                        |                     |                   |          |                  |       |           | wt            | 2             | 10/16         | 1.5614 | FYFENLWSR           |              |
|                                                        |                     |                   |          |                  |       |           | wt            | 2             | 16/20         | 3.4709 | GAILTM*LATR         |              |
|                                                        |                     |                   |          |                  |       |           | wt            | 2             | 20/22         | 4.5047 | ITQYLDAGGIPR        |              |
|                                                        |                     |                   |          |                  |       |           | wt            | 3             | 24/44         | 3.4717 | DLKPENLLASK         |              |
| Cell cycle exit and neuronal differentiation protein 1 | Q9JKC6              | 14,987            | C        | 2                | 4     | 5         | ko            | 2             | 18/30         | 3.603  | GPGDGAEEDESNTGGR    |              |
|                                                        |                     |                   |          |                  |       |           | ko            | 3             | 26/72         | 3.385  | DTQAEKQEAAAAPGPAATK |              |
|                                                        |                     |                   |          |                  |       |           | wt            | 2             | 16/36         | 3.452  | DTQAEKQEAAAAPGPAATK |              |
|                                                        |                     |                   |          |                  |       |           | wt            | 2             | 17/30         | 4.01   | GPGDGAEEDESNTGGR    |              |
|                                                        |                     |                   |          |                  |       |           | wt            | 3             | 29/72         | 3.789  | DTQAEKQEAAAAPGPAATK |              |
|                                                        |                     |                   |          |                  |       |           | wt            | 3             | 29/72         | 3.494  | DTQAEKQEAAAAPGPAATK |              |
| Cofilin                                                | P18760              | 18,560            | C        | 2                | 2     | 6         | ko            | 2             | 15/20         | 2.096  | YALYDATYETK         |              |
|                                                        |                     |                   |          |                  |       |           | ko            | 2             | 18/20         | 3.411  | YALYDATYETK         |              |
|                                                        |                     |                   |          |                  |       |           | wt            | 2             | 18/20         | 3.598  | YALYDATYETK         |              |
|                                                        |                     |                   |          |                  |       |           | wt            | 2             | 17/20         | 2.938  | YALYDATYETK         |              |

| protein name                                 | Swiss-Prot acc. no. | protein mass (Da) | data set      | matched peptides |        | slice no. | sample | charge state     | ions  | Xcorr  | assigned sequence     |                      |            |             |                 |
|----------------------------------------------|---------------------|-------------------|---------------|------------------|--------|-----------|--------|------------------|-------|--------|-----------------------|----------------------|------------|-------------|-----------------|
|                                              |                     |                   |               | ko               | wt     |           |        |                  |       |        |                       |                      |            |             |                 |
| Creatine kinase                              | P30275              | 47,004            | A             | 5                | 1      | 3         | ko     | 2                | 17/24 | 2.9903 | FCTGLTQIETLFK         |                      |            |             |                 |
|                                              |                     |                   |               |                  |        |           | wt     | 2                | 13/14 | 2.2973 | LLIEM*EQR             |                      |            |             |                 |
|                                              |                     |                   |               |                  |        |           | wt     | 2                | 22/40 | 3.9948 | GTGGVDTAAVGGVFDVSNADR |                      |            |             |                 |
|                                              |                     |                   |               |                  |        |           | wt     | 2                | 17/30 | 2.5256 | LAVEALSSLDGDLSSGR     |                      |            |             |                 |
|                                              |                     |                   |               |                  |        |           | wt     | 2                | 15/18 | 2.9963 | DLFDPIIEER            |                      |            |             |                 |
|                                              |                     |                   |               | wt               | 2      | 19/24     | 3.8179 | FCTGLTQIETLFK    |       |        |                       |                      |            |             |                 |
|                                              |                     |                   |               | B                | 3      | 3         | 3      | ko               | 2     | 11/12  | 2.161                 | SGYFDER              |            |             |                 |
|                                              |                     |                   |               | B                | 1      | 0         | 4      | ko               | 2     | 17/18  | 2.263                 | VVVDALSGLK           |            |             |                 |
|                                              |                     |                   |               |                  |        |           |        | ko               | 2     | 23/40  | 4.869                 | GTGGVDTAATGSVFDISNDR |            |             |                 |
|                                              |                     |                   |               |                  |        |           |        | ko               | 3     | 25/44  | 3.347                 | AGVHIKPLLSK          |            |             |                 |
|                                              |                     |                   |               |                  |        |           |        | wt               | 2     | 16/18  | 2.143                 | VVVDALSGLK           |            |             |                 |
|                                              |                     |                   |               |                  |        |           | wt     | 2                | 29/40 | 5.565  | GTGGVDTAATGSVFDISNDR  |                      |            |             |                 |
|                                              |                     |                   |               |                  |        |           | wt     | 3                | 27/84 | 3.389  | RGTGGVDTAATGSVFDISNDR |                      |            |             |                 |
|                                              |                     |                   |               |                  |        | C         | 0      | 2                | 3     | ko     | 2                     | 16/18                | 2.674      | DLFDPIIEER  |                 |
|                                              |                     |                   |               |                  |        |           |        |                  | ko    | 2      | 16/18                 | 2.255                | VVVDALSGLK |             |                 |
|                                              |                     |                   | CtBP1 protein | O88712           | 47,745 | B         | 1      | 1                | 4     | wt     | 2                     | 14/20                | 2.489      | IGSGFDNIDIK |                 |
|                                              |                     |                   |               |                  |        |           |        |                  |       | wt     | 2                     | 15/20                | 2.404      | GETLGHGLGR  |                 |
| C                                            | 0                   | 1                 |               |                  |        | 4         | ko     | 2                | 17/18 | 2.549  | QGAFVNTAR             |                      |            |             |                 |
| Cyclophilin CyP-S1                           | P24369              | 22,713            | B             | 1                | 0      | 1         | ko     | 2                | 17/24 | 3.074  | DTNGSQFFITTVK         |                      |            |             |                 |
|                                              |                     |                   |               |                  |        |           | ko     | 2                | 13/24 | 2.317  | TVDNFVALATGEK         |                      |            |             |                 |
|                                              |                     |                   |               |                  |        |           | wt     | 2                | 13/24 | 2.197  | TVDNFVALATGEK         |                      |            |             |                 |
|                                              |                     |                   |               |                  |        |           | wt     | 2                | 11/22 | 2.092  | VVFLGKTVPK            |                      |            |             |                 |
|                                              |                     |                   |               |                  |        |           | wt     | 2                | 13/24 | 2.197  | TVDNFVALATGEK         |                      |            |             |                 |
| Dihydropyrimidinase-related protein 1; Crmp1 | P97427              | 62,168            | A             | 2                | 2      | 3         | ko     | 2                | 16/18 | 3.9025 | SAADIHALAR            |                      |            |             |                 |
|                                              |                     |                   |               |                  |        |           | ko     | 2                | 17/24 | 2.8257 | QIGENLIVPGGVK         |                      |            |             |                 |
|                                              |                     |                   |               |                  |        |           | wt     | 2                | 17/18 | 3.9171 | SAADIHALAR            |                      |            |             |                 |
|                                              |                     |                   |               |                  |        |           | wt     | 2                | 14/22 | 2.5511 | IVFEDGNISVSK          |                      |            |             |                 |
|                                              |                     |                   | B             | 1                | 2      | 3         | ko     | 2                | 13/20 | 2.311  | ADGSTQVIDTK           |                      |            |             |                 |
|                                              |                     |                   |               |                  |        |           | wt     | 2                | 20/26 | 4.026  | TASGVTQLADIYEK        |                      |            |             |                 |
|                                              |                     |                   |               |                  |        |           | wt     | 2                | 16/18 | 3.223  | SAADIHALAR            |                      |            |             |                 |
| Dihydropyrimidinase-related protein 2; DRP-2 | O08553              | 62,278            | A             | 4                | 4      | 3         | ko     | 2                | 17/18 | 4.0816 | SAAEVIAQAR            |                      |            |             |                 |
|                                              |                     |                   |               |                  |        |           | ko     | 2                | 17/30 | 3.0798 | SITIANQTNCLYVTK       |                      |            |             |                 |
|                                              |                     |                   |               |                  |        |           | ko     | 2                | 18/30 | 3.3373 | IVLEDGTLHVTEGSGR      |                      |            |             |                 |
|                                              |                     |                   |               |                  |        |           | ko     | 2                | 16/28 | 2.4512 | GLYDGPVCEVSVTPK       |                      |            |             |                 |
|                                              |                     |                   |               |                  |        |           | wt     | 2                | 17/30 | 3.8635 | SITIANQTNCLYVTK       |                      |            |             |                 |
|                                              |                     |                   |               |                  |        |           | wt     | 2                | 16/30 | 2.4127 | IVLEDGTLHVTEGSGR      |                      |            |             |                 |
|                                              |                     |                   |               |                  |        |           | wt     | 2                | 17/28 | 2.48   | GLYDGPVCEVSVTPK       |                      |            |             |                 |
|                                              |                     |                   |               |                  |        |           | wt     | 2                | 17/18 | 3.8308 | SAAEVIAQAR            |                      |            |             |                 |
|                                              |                     |                   |               |                  |        |           | B      | 2                | 5     | 3      | ko                    | 2                    | 11/12      | 2.197       | VFNLYPR         |
|                                              |                     |                   |               |                  |        |           |        |                  |       |        | ko                    | 2                    | 16/30      | 2.996       | SITIANQTNCLYVTK |
|                                              |                     |                   |               |                  |        |           | wt     | 2                | 16/20 | 2.599  | GSPLVVISQ GK          |                      |            |             |                 |
|                                              |                     |                   |               |                  |        |           | wt     | 2                | 13/16 | 2.216  | KFPDFVYK              |                      |            |             |                 |
|                                              |                     |                   |               |                  |        |           | wt     | 2                | 18/28 | 3.075  | GLYDGPVCEVSVTPK       |                      |            |             |                 |
|                                              |                     |                   |               | wt               | 2      | 14/30     | 3.16   | IVLEDGTLHVTEGSGR |       |        |                       |                      |            |             |                 |

| protein name                         | Swiss-Prot acc. no. | protein mass (Da) | data set | matched peptides |    | slice no. | sample | charge state | ions  | Xcorr  | assigned sequence     |       |       |                |   |       |
|--------------------------------------|---------------------|-------------------|----------|------------------|----|-----------|--------|--------------|-------|--------|-----------------------|-------|-------|----------------|---|-------|
|                                      |                     |                   |          | ko               | wt |           |        |              |       |        |                       |       |       |                |   |       |
|                                      |                     |                   |          |                  |    |           | wt     | 3            | 29/60 | 3.798  | SITIANQTNCLPLYVTK     |       |       |                |   |       |
| Dynammin-1                           | P39053              | 97,803            | A        | 6                | 4  | 1         | ko     | 2            | 10/18 | 1.8464 | SSVLENFVGR            |       |       |                |   |       |
|                                      |                     |                   |          |                  |    |           | ko     | 2            | 12/14 | 1.9811 | GYIGVVNR              |       |       |                |   |       |
|                                      |                     |                   |          |                  |    |           | ko     | 2            | 16/22 | 3.5012 | NLVDSYM*AIVNK         |       |       |                |   |       |
|                                      |                     |                   |          |                  |    |           | ko     | 2            | 16/22 | 3.7414 | TSGNQDEILVIR          |       |       |                |   |       |
|                                      |                     |                   |          |                  |    |           | ko     | 2            | 22/34 | 4.4245 | IEGSGDQIDTYELSGGAR    |       |       |                |   |       |
|                                      |                     |                   |          |                  |    |           | ko     | 3            | 28/80 | 3.9026 | GPPPSGIATLVSGIAGEEPQR |       |       |                |   |       |
|                                      |                     |                   |          |                  |    |           | wt     | 2            | 20/34 | 3.6684 | IEGSGDQIDTYELSGGAR    |       |       |                |   |       |
|                                      |                     |                   |          |                  |    |           | wt     | 2            | 12/14 | 2.1858 | GYIGVVNR              |       |       |                |   |       |
|                                      |                     |                   |          |                  |    |           | wt     | 2            | 16/22 | 3.9378 | TSGNQDEILVIR          |       |       |                |   |       |
|                                      |                     |                   |          |                  |    |           | wt     | 2            | 15/22 | 3.1307 | NLVDSYM*AIVNK         |       |       |                |   |       |
|                                      |                     |                   |          |                  |    |           |        |              |       | C      | 1                     | 1     | 1     | ko             | 2 | 16/20 |
|                                      |                     |                   |          |                  |    |           | wt     | 2            | 18/20 | 3.546  | LDLMDEGTDAR           |       |       |                |   |       |
| Elongation factor 1 A-2              | P62631              | 50,454            | A        | 0                | 1  | 3         | wt     | 2            | 16/20 | 3.755  | IGGIGTVPVGR           |       |       |                |   |       |
|                                      |                     |                   |          |                  |    |           |        |              |       |        |                       |       |       |                |   |       |
|                                      |                     |                   |          |                  |    |           |        |              |       |        |                       |       |       |                |   |       |
|                                      |                     |                   |          |                  |    | B         | 1      | 2            | 3     | ko     | 2                     | 11/22 | 2.462 | EGIPALDNFLDK   |   |       |
|                                      |                     |                   |          |                  |    |           | 0      | 1            | 4     | wt     | 2                     | 15/20 | 2.55  | IGGIGTVPVGR    |   |       |
|                                      |                     |                   |          |                  |    |           |        |              |       | wt     | 2                     | 18/26 | 3.218 | ETVSEESNVLCISK |   |       |
|                                      |                     |                   |          |                  |    |           |        |              |       | wt     | 2                     | 13/18 | 2.636 | STTTGHLIYK     |   |       |
|                                      |                     |                   |          |                  |    | C         | 2      | 4            | 3     | ko     | 2                     | 19/20 | 3.032 | IGGIGTVPVGR    |   |       |
|                                      |                     |                   |          |                  |    |           | 1      | 1            | 4     | ko     | 2                     | 13/20 | 2.379 | MDSTEPPEYSQK   |   |       |
|                                      |                     |                   |          |                  |    |           |        |              |       | ko     | 2                     | 16/20 | 3.162 | IGGIGTVPVGR    |   |       |
|                                      |                     |                   |          |                  |    |           |        |              |       | wt     | 2                     | 17/20 | 2.718 | IGGIGTVPVGR    |   |       |
|                                      |                     |                   |          |                  |    |           |        |              |       | wt     | 2                     | 17/20 | 2.461 | IGGIGTVPVGR    |   |       |
|                                      |                     |                   |          |                  |    |           |        |              |       | wt     | 2                     | 19/20 | 3.338 | IGGIGTVPVGR    |   |       |
|                                      |                     |                   |          |                  |    |           |        |              |       | wt     | 2                     | 19/20 | 3.631 | IGGIGTVPVGR    |   |       |
|                                      |                     |                   |          |                  |    |           |        |              |       | wt     | 2                     | 14/20 | 2.311 | MDSTEPAYSEK    |   |       |
| Elongation factor 1-gamma            | Q9D8N0              | 50,061            | A        | 2                | 1  | 3         | ko     | 2            | 15/18 | 2.7858 | STFVLDEFKR            |       |       |                |   |       |
|                                      |                     |                   |          |                  |    |           | ko     | 2            | 19/24 | 4.1199 | ALIAAQYSGAQVR         |       |       |                |   |       |
|                                      |                     |                   |          |                  |    |           | wt     | 2            | 19/24 | 3.8545 | ALIAAQYSGAQVR         |       |       |                |   |       |
| Elongation factor Tu                 | Q8BFR5              | 49,508            | B        | 2                | 1  | 4         | ko     | 2            | 16/22 | 2.89   | AEAGDNLGALVR          |       |       |                |   |       |
|                                      |                     |                   |          |                  |    |           | wt     | 2            | 20/22 | 2.818  | AEAGDNLGALVR          |       |       |                |   |       |
|                                      |                     |                   |          |                  |    | C         | 1      | 1            | 4     | ko     | 2                     | 19/22 | 3.912 | AEAGDNLGALVR   |   |       |
|                                      |                     |                   |          |                  |    |           |        |              |       | ko     | 2                     | 19/22 | 4.016 | AEAGDNLGALVR   |   |       |
|                                      |                     |                   |          |                  |    |           |        |              |       | wt     | 2                     | 17/22 | 3.563 | AEAGDNLGALVR   |   |       |
| Enolase, alpha                       | P17182              | 47,141            | B        | 1                | 2  | 4         | ko     | 2            | 24/36 | 4.714  | DATNVGDEGGFAPNILENK   |       |       |                |   |       |
|                                      |                     |                   |          |                  |    |           | wt     | 2            | 23/36 | 3.758  | DATNVGDEGGFAPNILENK   |       |       |                |   |       |
|                                      |                     |                   |          |                  |    |           | wt     | 2            | 24/34 | 4.031  | AAVPSGASTGIYEALER     |       |       |                |   |       |
| F-actin-capping protein subunit beta | P47757              | 31,345            | A        | 1                | 1  | 6         | ko     | 2            | 14/18 | 2.2053 | STLNEIYFGK            |       |       |                |   |       |
|                                      |                     |                   |          |                  |    |           | wt     | 2            | 15/18 | 2.8966 | STLNEIYFGK            |       |       |                |   |       |
| Fructose-bisphosphate aldolase A     | P05064              | 39,356            | A        | 0                | 3  | 3         | wt     | 2            | 18/28 | 3.1246 | FSNEEIAM*ATVTALR      |       |       |                |   |       |
|                                      |                     |                   |          |                  |    |           | wt     | 2            | 11/16 | 2.2915 | AAQEEYIKR             |       |       |                |   |       |

| protein name                     | Swiss-Prot acc. no. | protein mass (Da) | data set | matched peptides |    | slice no. | sample | charge state | ions  | Xcorr  | assigned sequence       |
|----------------------------------|---------------------|-------------------|----------|------------------|----|-----------|--------|--------------|-------|--------|-------------------------|
|                                  |                     |                   |          | ko               | wt |           |        |              |       |        |                         |
|                                  |                     |                   |          |                  |    |           | wt     | 2            | 20/26 | 4.375  | GILAADESTGSIK           |
|                                  |                     |                   | B        | 3                | 4  | 3         | ko     | 3            | 24/76 | 3.673  | IGEHTPSALAIMENANVLAR    |
|                                  |                     |                   |          |                  |    |           | ko     | 2            | 16/26 | 2.805  | GILAADESTGSIK           |
|                                  |                     |                   |          |                  |    |           | ko     | 2            | 19/26 | 3.128  | GILAADESTGSIK           |
|                                  |                     |                   |          |                  |    |           | wt     | 2            | 15/20 | 2.136  | ALANSLACQ GK            |
|                                  |                     |                   |          |                  |    |           | wt     | 3            | 29/88 | 4.617  | GVVPLAGTNGETTTQGLDGLSER |
|                                  |                     |                   |          |                  |    |           | wt     | 2            | 20/26 | 3.102  | GILAADESTGSIK           |
|                                  |                     |                   |          |                  |    |           | wt     | 2            | 19/26 | 3.589  | GILAADESTGSIK           |
|                                  |                     |                   | C        | 6                | 6  | 4         | ko     | 2            | 14/20 | 2.645  | ALANSLACQ GK            |
|                                  |                     |                   |          |                  |    |           | ko     | 2            | 15/20 | 2.799  | ALANSLACQ GK            |
|                                  |                     |                   |          |                  |    |           | ko     | 2            | 12/16 | 2.759  | AAQEYIKR                |
|                                  |                     |                   |          |                  |    |           | ko     | 2            | 21/24 | 3.144  | LQSIGTENTEENR           |
|                                  |                     |                   |          |                  |    |           | ko     | 2            | 20/26 | 4.039  | GILAADESTGSIK           |
|                                  |                     |                   |          |                  |    |           | ko     | 2            | 20/26 | 4.152  | GILAADESTGSIK           |
|                                  |                     |                   |          |                  |    |           | wt     | 2            | 15/20 | 2.81   | ALANSLACQ GK            |
|                                  |                     |                   |          |                  |    |           | wt     | 2            | 15/20 | 3.088  | ALANSLACQ GK            |
|                                  |                     |                   |          |                  |    |           | wt     | 2            | 17/24 | 3.098  | LQSIGTENTEENR           |
|                                  |                     |                   |          |                  |    |           | wt     | 2            | 18/24 | 2.924  | LQSIGTENTEENR           |
|                                  |                     |                   |          |                  |    |           | wt     | 2            | 20/26 | 4.046  | GILAADESTGSIK           |
|                                  |                     |                   |          |                  |    |           | wt     | 2            | 20/26 | 4.046  | GILAADESTGSIK           |
| Fructose-bisphosphate aldolase C | P05063              | 39,395            | A        | 1                | 0  | 3         | ko     | 2            | 23/30 | 5.2307 | TPSALAIENANVLAR         |
|                                  |                     |                   |          | 0                | 1  | 4         | wt     | 2            | 9/16  | 1.8301 | QVLFSAADDR              |
|                                  |                     |                   |          |                  |    |           | wt     | 2            | 24/30 | 5.2625 | TPSALAIENANVLAR         |
|                                  |                     |                   | B        | 1                | 1  | 4         | wt     | 2            | 23/30 | 4.38   | TPSALAIENANVLAR         |
|                                  |                     |                   |          |                  |    |           | wt     | 2            | 17/22 | 3.4    | EANELQQWITEK            |
|                                  |                     |                   | C        | 3                | 3  | 4         | ko     | 2            | 13/16 | 2.14   | QVLFSAADDR              |
|                                  |                     |                   |          |                  |    |           | ko     | 2            | 18/24 | 3.228  | LSQIGVENTEENR           |
|                                  |                     |                   |          |                  |    |           | ko     | 2            | 18/22 | 3.286  | DNAGAATEEFIK            |
|                                  |                     |                   |          |                  |    |           | wt     | 2            | 12/16 | 2.074  | QVLFSAADDR              |
|                                  |                     |                   |          |                  |    |           | wt     | 2            | 20/26 | 3.744  | GILAADESVGSMK           |
|                                  |                     |                   |          |                  |    |           | wt     | 2            | 20/26 | 4.108  | GILAADESVGSMK           |
| GABA transporter 4               | P31650              | 69,889            | B        | 0                | 1  | 2         | wt     | 2            | 20/30 | 2.865  | GSETLGGGGGAAGTR         |
|                                  |                     |                   | C        | 3                | 2  | 2         | ko     | 2            | 20/30 | 3.492  | GSETLGGGGGAAGTR         |
|                                  |                     |                   |          |                  |    |           | ko     | 2            | 23/30 | 3.968  | GSETLGGGGGAAGTR         |
|                                  |                     |                   |          |                  |    |           | ko     | 2            | 20/30 | 3.492  | GSETLGGGGGAAGTR         |
|                                  |                     |                   |          |                  |    |           | wt     | 2            | 20/30 | 3.452  | GSETLGGGGGAAGTR         |
|                                  |                     |                   |          |                  |    |           | wt     | 2            | 22/30 | 4.127  | GSETLGGGGGAAGTR         |
| Gamma-enolase                    | P17183              | 47,297            | C        | 1                | 1  | 3         | ko     | 3            | 26/72 | 3      | DATNVGDEGGFAPNILENK     |
|                                  |                     |                   |          |                  |    |           | wt     | 2            | 22/36 | 2.891  | DATNVGDEGGFAPNILENK     |
| Glial fibrillary acidic protein  | P03995              | 49,900            | C        | 4                | 4  | 3         | ko     | 2            | 14/18 | 2.072  | QEAEATLAR               |
|                                  |                     |                   |          |                  |    |           | ko     | 2            | 17/18 | 3.2    | FADLTAASR               |
|                                  |                     |                   |          |                  |    |           | ko     | 2            | 16/18 | 3.013  | ALAAELNQLR              |
|                                  |                     |                   |          |                  |    |           | ko     | 2            | 17/20 | 3.418  | LEAENLAAYR              |
|                                  |                     |                   |          |                  |    |           | wt     | 2            | 12/18 | 2.096  | QEAEATLAR               |

| protein name                             | Swiss-Prot acc. no. | protein mass (Da) | data set | matched peptides |    | slice no. | sample | charge state | ions  | Xcorr  | assigned sequence     |
|------------------------------------------|---------------------|-------------------|----------|------------------|----|-----------|--------|--------------|-------|--------|-----------------------|
|                                          |                     |                   |          | ko               | wt |           |        |              |       |        |                       |
|                                          |                     |                   |          |                  |    |           | wt     | 2            | 16/18 | 3.461  | ALAAELNQLR            |
|                                          |                     |                   |          |                  |    |           | wt     | 2            | 15/20 | 3.105  | ESASYQEALAR           |
|                                          |                     |                   |          |                  |    |           | wt     | 2            | 16/18 | 3.383  | LADVYQAE LR           |
| Glutamate dehydrogenase 1                | P26443              | 61,337            | A        | 2                | 6  | 4         | ko     | 2            | 12/18 | 2.5035 | TAAAYVNAIEK           |
|                                          |                     |                   |          |                  |    |           | ko     | 2            | 15/20 | 2.5651 | YSTDVSVDEVK           |
|                                          |                     |                   |          |                  |    |           | wt     | 2            | 10/14 | 1.9866 | YNLGLDLR              |
|                                          |                     |                   |          |                  |    |           | wt     | 2            | 12/18 | 2.5035 | TAAAYVNAIEK           |
|                                          |                     |                   |          |                  |    |           | wt     | 2            | 15/20 | 2.5651 | YSTDVSVDEVK           |
|                                          |                     |                   |          |                  |    |           | wt     | 3            | 31/80 | 3.1909 | IIAEGANGPTTPEADKIFLER |
|                                          |                     |                   | B        | 0                | 2  | 4         | wt     | 2            | 11/20 | 2.427  | YSTDVSVDEVK           |
|                                          |                     |                   |          |                  |    |           | wt     | 2            | 15/18 | 2.64   | TAAAYVNAIEK           |
| Glyceraldehyde-3-phosphate dehydrogenase | P16858              | 35,810            | A        | 2                | 4  | 4         | ko     | 2            | 15/28 | 3.0403 | GAAQNIIPASTGAAK       |
|                                          |                     |                   |          |                  |    |           | ko     | 2            | 16/22 | 3.2041 | VVDLM*AYM*ASKE        |
|                                          |                     |                   |          |                  |    |           | wt     | 2            | 16/26 | 2.5086 | LVI NGKPITIFQER       |
|                                          |                     |                   |          |                  |    |           | wt     | 2            | 20/28 | 3.9067 | GAAQNIIPASTGAAK       |
|                                          |                     |                   |          |                  |    |           | wt     | 2            | 16/20 | 3.4336 | VVDLM*AYM*ASK         |
|                                          |                     |                   |          |                  |    |           | wt     | 2            | 18/26 | 4.2166 | LISWYDNEYGYSNR        |
|                                          |                     |                   | C        | 3                | 5  | 4         | ko     | 2            | 21/32 | 4.179  | IVSNASCTTNCLAPLAK     |
|                                          |                     |                   |          |                  |    |           | ko     | 2            | 24/34 | 4.492  | DGRGAAQNIIPASTGAAK    |
|                                          |                     |                   |          |                  |    |           | ko     | 2            | 15/16 | 2.857  | LISEVIGER             |
|                                          |                     |                   |          |                  |    |           | wt     | 2            | 22/32 | 4.27   | IVSNASCTTNCLAPLAK     |
|                                          |                     |                   |          |                  |    |           | wt     | 2            | 20/34 | 4.41   | DGRGAAQNIIPASTGAAK    |
|                                          |                     |                   |          |                  |    |           | wt     | 2            | 15/26 | 3.061  | VTPPNVSVVDLTCR        |
|                                          |                     |                   |          |                  |    |           | wt     | 2            | 15/16 | 2.765  | LISEVIGER             |
|                                          |                     |                   |          |                  |    |           | wt     | 2            | 15/18 | 2.591  | NYLSSDVEVR            |
| Glycogen phosphorylase                   | Q8CI94              | 96,730            | A        | 3                | 1  | 1         | ko     | 2            | 13/14 | 2.3106 | VIFLENYR              |
|                                          |                     |                   |          |                  |    |           | ko     | 2            | 12/22 | 1.8403 | VLYPNDNFFEGK          |
|                                          |                     |                   |          |                  |    |           | ko     | 2            | 17/22 | 3.3379 | GIAGLDVAEVR           |
|                                          |                     |                   |          |                  |    |           | wt     | 2            | 14/22 | 2.1458 | GIAGLDVAEVR           |
|                                          |                     |                   | B        | 2                | 1  | 1         | ko     | 2            | 16/26 | 2.766  | VTPPNVSVVDLTCR        |
|                                          |                     |                   |          |                  |    |           | ko     | 2            | 17/22 | 2.382  | GIAGLDVAEVR           |
|                                          |                     |                   |          |                  |    |           | wt     | 2            | 18/22 | 2.528  | GIAGLDVAEVR           |
|                                          |                     |                   | C        | 2                | 1  | 1         | ko     | 2            | 15/22 | 2.425  | GIAGLDVAEVR           |
|                                          |                     |                   |          |                  |    |           | ko     | 2            | 15/26 | 2.651  | QAVDQISSGFFSPK        |
|                                          |                     |                   |          |                  |    |           | wt     | 2            | 13/16 | 2.074  | YEFGIFNQK             |
| GTP-binding protein Di-Ras2              | Q5PR73              | 22,498            | C        | 1                | 2  | 6         | ko     | 2            | 18/22 | 2.625  | EVQSSEAEALAR          |
|                                          |                     |                   |          |                  |    |           | wt     | 2            | 15/22 | 2.865  | EVQSSEAEALAR          |
|                                          |                     |                   |          |                  |    |           | wt     | 2            | 18/22 | 3.69   | EVQSSEAEALAR          |
| Guanine deaminase                        | Q9R111              | 51,013            | A        | 1                | 2  | 3         | ko     | 2            | 15/16 | 2.5089 | TPPLALVFR             |
|                                          |                     |                   |          |                  |    |           | wt     | 2            | 14/16 | 2.6572 | TPPLALVFR             |
|                                          |                     |                   |          |                  |    |           | wt     | 2            | 17/20 | 3.4153 | STDVAEEVYTR           |
|                                          |                     |                   | C        | 2                | 1  | 3         | ko     | 2            | 17/20 | 3.446  | STDVAEEVYTR           |
|                                          |                     |                   | C        |                  |    |           | ko     | 2            | 16/18 | 2.919  | NIEEYVGGK             |

| protein name                                      | Swiss-Prot acc. no. | protein mass (Da) | data set | matched peptides |    | slice no. | sample | charge state | ions  | Xcorr  | assigned sequence |   |       |       |             |
|---------------------------------------------------|---------------------|-------------------|----------|------------------|----|-----------|--------|--------------|-------|--------|-------------------|---|-------|-------|-------------|
|                                                   |                     |                   |          | ko               | wt |           |        |              |       |        |                   |   |       |       |             |
|                                                   |                     |                   | C        |                  |    |           | wt     | 2            | 17/20 | 3.67   | STDVAEEVYTR       |   |       |       |             |
| Guanine nucleotide-binding protein subunit beta 4 | P29387              | 37,379            | A        | 1                | 1  | 4         | ko     | 2            | 14/20 | 2.2952 | LIWDSYTTNK        |   |       |       |             |
|                                                   |                     |                   |          |                  |    |           | wt     | 2            | 17/20 | 3.8901 | LIWDSYTTNK        |   |       |       |             |
| Heat shock 70 kDa protein 12A                     | Q8K0U4              | 74,871            | A        | 4                | 4  | 2         | ko     | 2            | 13/20 | 2.1729 | TPITILLTPER       |   |       |       |             |
|                                                   |                     |                   |          |                  |    |           | ko     | 2            | 16/24 | 3.0246 | GAVLFGLDPAVIK     |   |       |       |             |
|                                                   |                     |                   |          |                  |    |           | ko     | 2            | 19/22 | 3.1228 | SPLTYGVGVLNR      |   |       |       |             |
|                                                   |                     |                   |          |                  |    |           | ko     | 2            | 19/24 | 3.1138 | TTPSYVAFTDTER     |   |       |       |             |
|                                                   |                     |                   |          |                  |    |           | wt     | 2            | 14/20 | 2.5637 | TPITILLTPER       |   |       |       |             |
|                                                   |                     |                   |          |                  |    |           | wt     | 2            | 17/24 | 3.0038 | GAVLFGLDPAVIK     |   |       |       |             |
|                                                   |                     |                   |          |                  |    |           | wt     | 2            | 17/22 | 3.3315 | SPLTYGVGVLNR      |   |       |       |             |
|                                                   |                     |                   |          |                  |    |           | wt     | 2            | 19/24 | 3.3328 | TTPSYVAFTDTER     |   |       |       |             |
|                                                   |                     |                   |          |                  |    |           | C      | 4            | 4     | 3      | ko                | 2 | 15/22 | 3.004 | WEGGDPGVSQK |
|                                                   |                     |                   |          |                  |    |           | ko     | 2            | 14/22 | 2.691  | WEGGDPGVSQK       |   |       |       |             |
|                                                   |                     |                   |          |                  |    |           | ko     | 2            | 14/24 | 2.952  | ETAPTSTYSSPAR     |   |       |       |             |
|                                                   |                     |                   |          |                  |    |           | ko     | 2            | 16/24 | 2.435  | ETAPTSTYSSPAR     |   |       |       |             |
|                                                   |                     |                   |          |                  |    |           | wt     | 2            | 13/20 | 2.184  | TPITILLTPER       |   |       |       |             |
|                                                   |                     |                   |          |                  |    |           | wt     | 2            | 23/26 | 3.827  | LDLTGSGGTAVPAR    |   |       |       |             |
|                                                   |                     |                   |          |                  |    |           | wt     | 2            | 15/22 | 3.173  | WEGGDPGVSQK       |   |       |       |             |
| wt                                                | 2                   | 14/24             | 3.096    | ETAPTSTYSSPAR    |    |           |        |              |       |        |                   |   |       |       |             |
| Heat shock 70 kDa protein 4L                      | P48722              | 94,382            | B        | 2                | 2  | 1         | ko     | 2            | 16/26 | 3.289  | ELSTTLNADEAVTR    |   |       |       |             |
|                                                   |                     |                   |          |                  |    |           | ko     | 2            | 18/24 | 3.422  | VLATAFDTLGGR      |   |       |       |             |
|                                                   |                     |                   |          |                  |    |           | wt     | 2            | 14/26 | 2.628  | AGGIETIANEYSDR    |   |       |       |             |
|                                                   |                     |                   |          |                  |    |           | wt     | 2            | 20/24 | 3.436  | VLATAFDTLGGR      |   |       |       |             |
| Heat shock 70 kDa protein 5: BiP                  | P20029              | 72,422            | A        | 3                | 6  | 2         | ko     | 2            | 15/20 | 2.861  | VEIANDQGNR        |   |       |       |             |
|                                                   |                     |                   |          |                  |    |           | ko     | 2            | 24/30 | 4.1517 | IINEPTAAAIAAYGLDK |   |       |       |             |
|                                                   |                     |                   |          |                  |    |           | ko     | 2            | 23/32 | 3.8788 | SQIFSTASDNQPTVTIK |   |       |       |             |
|                                                   |                     |                   |          |                  |    |           | wt     | 2            | 11/16 | 2.1115 | ITITNDQNR         |   |       |       |             |
|                                                   |                     |                   |          |                  |    |           | wt     | 2            | 19/20 | 3.1396 | VEIANDQGNR        |   |       |       |             |
|                                                   |                     |                   |          |                  |    |           | wt     | 2            | 15/22 | 2.4472 | DAGTIAGLNVNMR     |   |       |       |             |
|                                                   |                     |                   |          |                  |    |           | wt     | 2            | 20/30 | 3.0335 | IINEPTAAAIAAYGLDK |   |       |       |             |
|                                                   |                     |                   |          |                  |    |           | wt     | 2            | 17/26 | 3.0739 | ITPSYVAFTPEGER    |   |       |       |             |
|                                                   |                     |                   |          |                  |    |           | wt     | 2            | 25/32 | 4.749  | SQIFSTASDNQPTVTIK |   |       |       |             |
|                                                   |                     |                   |          |                  |    |           | B      | 2            | 2     | 2      | ko                | 2 | 13/20 | 2.064 | VEIANDQGNR  |
|                                                   |                     |                   |          |                  |    |           | wt     | 2            | 18/22 | 3.264  | ADLNNLGTIAK       |   |       |       |             |
|                                                   |                     |                   |          |                  |    |           | C      | 1            | 1     | 2      | ko                | 2 | 18/20 | 2.887 | VEIANDQGNR  |
| wt                                                | 2                   | 18/20             | 3.024    | VEIANDQGNR       |    |           |        |              |       |        |                   |   |       |       |             |
| Heat shock 70 kDa protein 8                       | P63017              | 70,871            | A        | 10               | 6  | 2         | ko     | 2            | 11/14 | 1.58   | GTLDPVEK          |   |       |       |             |
|                                                   |                     |                   |          |                  |    |           | ko     | 2            | 13/20 | 2.4332 | NSLESYAFNMK       |   |       |       |             |
|                                                   |                     |                   |          |                  |    |           | ko     | 2            | 20/22 | 3.6719 | DAGTIAGLNVLR      |   |       |       |             |
|                                                   |                     |                   |          |                  |    |           | ko     | 2            | 16/26 | 1.9315 | SQHIDIVLVGGSTR    |   |       |       |             |
|                                                   |                     |                   |          |                  |    |           | ko     | 2            | 18/20 | 2.9645 | M*KEIAEAYLGK      |   |       |       |             |
|                                                   |                     |                   |          |                  |    |           | ko     | 2            | 20/30 | 3.7155 | QATKDAGTIAGLNVLR  |   |       |       |             |
|                                                   |                     |                   |          |                  |    |           | ko     | 2            | 14/18 | 2.7305 | VQVEYKGETK        |   |       |       |             |

| protein name                | Swiss-Prot acc. no. | protein mass (Da) | data set | matched peptides |    | slice no. | sample | charge state | ions  | Xcorr  | assigned sequence  |
|-----------------------------|---------------------|-------------------|----------|------------------|----|-----------|--------|--------------|-------|--------|--------------------|
|                             |                     |                   |          | ko               | wt |           |        |              |       |        |                    |
|                             |                     |                   |          |                  |    |           | ko     | 2            | 19/26 | 3.9681 | SFYPEEVSSM*VLTK    |
|                             |                     |                   |          |                  |    |           | ko     | 3            | 30/64 | 3.5655 | LDKSQIHDIIVLVGGSTR |
|                             |                     |                   |          |                  |    |           | ko     | 3            | 34/68 | 4.7799 | TVTNAVVTVPAYFNDSQR |
|                             |                     |                   |          |                  |    |           | wt     | 2            | 17/22 | 3.8039 | DAGTIAGLNVLR       |
|                             |                     |                   |          |                  |    |           | wt     | 2            | 13/18 | 2.4063 | VQVEYKGETK         |
|                             |                     |                   |          |                  |    |           | wt     | 2            | 17/34 | 3.163  | TVTNAVVTVPAYFNDSQR |
|                             |                     |                   |          |                  |    |           | wt     | 2            | 15/20 | 3.213  | NSLESYAFNM*K       |
|                             |                     |                   |          |                  |    |           | wt     | 2            | 19/26 | 3.5906 | SQIHDIIVLVGGSTR    |
|                             |                     |                   |          |                  |    |           | wt     | 3            | 21/40 | 3.073  | M*KEIAEAYLGK       |
| Heat shock 70 kDa protein 9 | P38647              | 73,528            | A        | 2                | 3  | 2         | ko     | 2            | 14/28 | 1.6422 | NAVITVPAYFNDSQR    |
|                             |                     |                   |          |                  |    |           | ko     | 2            | 17/20 | 2.9903 | VQQTVDLFR          |
|                             |                     |                   |          |                  |    |           | wt     | 2            | 17/22 | 2.8142 | AQFEGIVTDLIK       |
|                             |                     |                   |          |                  |    |           | wt     | 2            | 16/22 | 3.2057 | DAGQISGLNVLR       |
|                             |                     |                   |          |                  |    |           | wt     | 2            | 15/20 | 2.9732 | VQQTVDLFR          |
|                             |                     |                   | B        | 3                | 3  | 2         | ko     | 2            | 15/20 | 2.634  | VQQTVDLFR          |
|                             |                     |                   |          |                  |    |           | ko     | 2            | 17/22 | 3.132  | DAGQISGLNVLR       |
|                             |                     |                   |          |                  |    |           | ko     | 2            | 17/26 | 3.189  | TTPSYVAFTADGER     |
|                             |                     |                   |          |                  |    |           | wt     | 2            | 18/22 | 3.239  | DAGQISGLNVLR       |
|                             |                     |                   |          |                  |    |           | wt     | 2            | 14/20 | 2.748  | VQQTVDLFR          |
|                             |                     |                   |          |                  |    |           | wt     | 2            | 17/20 | 3.278  | VQQTVDLFR          |
|                             |                     |                   |          |                  |    |           | wt     | 2            | 19/26 | 3.283  | TTPSYVAFTADGER     |
| Heat shock cognate 71 kDa   | P63017              | 70,871            | B        | 10               | 7  | 2         | ko     | 2            | 18/22 | 2.978  | DAGTIAGLNVLR       |
|                             |                     |                   |          |                  |    |           | ko     | 2            | 18/22 | 3.508  | DAGTIAGLNVLR       |
|                             |                     |                   |          |                  |    |           | ko     | 2            | 14/16 | 2.021  | LLQDFENGK          |
|                             |                     |                   |          |                  |    |           | ko     | 2            | 12/20 | 2.811  | NSLESYAFNMK        |
|                             |                     |                   |          |                  |    |           | ko     | 2            | 10/24 | 2.012  | TTPSYVAFTDTER      |
|                             |                     |                   |          |                  |    |           | ko     | 2            | 14/18 | 2.639  | FEELNADLFR         |
|                             |                     |                   |          |                  |    |           | ko     | 2            | 17/24 | 2.588  | TTPSYVAFTDTER      |
|                             |                     |                   |          |                  |    |           | ko     | 2            | 20/26 | 3.315  | SFYPEEVSSMVLTK     |
|                             |                     |                   |          |                  |    |           | ko     | 2            | 22/28 | 4.061  | NQVAMNPTNTVFDAK    |
|                             |                     |                   |          |                  |    |           | ko     | 2            | 18/24 | 3.241  | TTPSYVAFTDTER      |
|                             |                     |                   |          |                  |    |           | wt     | 2            | 18/20 | 3.316  | VAEDETEAGVK        |
|                             |                     |                   |          |                  |    |           | wt     | 2            | 14/18 | 2.474  | FEEDDPEYLR         |
|                             |                     |                   |          |                  |    |           | wt     | 2            | 19/22 | 3.546  | DAGTIAGLNVLR       |
|                             |                     |                   |          |                  |    |           | wt     | 2            | 14/18 | 3.273  | FEELNADLFR         |
|                             |                     |                   |          |                  |    |           | wt     | 2            | 16/24 | 2.698  | TTPSYVAFTDTER      |
|                             |                     |                   |          |                  |    |           | wt     | 2            | 17/24 | 3.001  | TTPSYVAFTDTER      |
|                             |                     |                   |          |                  |    |           | wt     | 3            | 26/68 | 3.66   | TVTNAVVTVPAYFNDSQR |
|                             |                     |                   | C        | 14               | 15 | 2         | ko     | 1            | 10/24 | 1.829  | TTPSYVAFTDTER      |
|                             |                     |                   |          |                  |    |           | ko     | 1            | 10/24 | 2.31   | TTPSYVAFTDTER      |
|                             |                     |                   |          |                  |    |           | ko     | 2            | 14/18 | 2.769  | FEELNADLFR         |
|                             |                     |                   |          |                  |    |           | ko     | 2            | 19/22 | 4.148  | DAGTIAGLNVLR       |
|                             |                     |                   |          |                  |    |           | ko     | 2            | 19/22 | 3.705  | DAGTIAGLNVLR       |
|                             |                     |                   |          |                  |    |           | ko     | 2            | 18/20 | 3.377  | FDDAVVQSDMK        |
|                             |                     |                   |          |                  |    |           | ko     | 2            | 14/18 | 2.488  | VQVEYKGETK         |
|                             |                     |                   |          |                  |    |           | ko     | 2            | 20/22 | 3.86   | DAGTIAGLNVLR       |

| protein name                    | Swiss-Prot acc. no. | protein mass (Da) | data set | matched peptides |    | slice no. | sample | charge state | ions  | Xcorr  | assigned sequence            |
|---------------------------------|---------------------|-------------------|----------|------------------|----|-----------|--------|--------------|-------|--------|------------------------------|
|                                 |                     |                   |          | ko               | wt |           |        |              |       |        |                              |
|                                 |                     |                   |          |                  |    |           | ko     | 2            | 19/24 | 3.006  | TTPSYVAFTDTER                |
|                                 |                     |                   |          |                  |    |           | ko     | 2            | 20/30 | 4.486  | STAGDTHLGGEDFDNR             |
|                                 |                     |                   |          |                  |    |           | ko     | 2            | 19/24 | 2.946  | TTPSYVAFTDTER                |
|                                 |                     |                   |          |                  |    |           | ko     | 2            | 23/28 | 4.466  | NQVAMNPTNTVFDAK              |
|                                 |                     |                   |          |                  |    |           | ko     | 3            | 19/60 | 2.7    | STAGDTHLGGEDFDNR             |
|                                 |                     |                   |          |                  |    |           | ko     | 3            | 24/60 | 2.856  | STAGDTHLGGEDFDNR             |
|                                 |                     |                   |          |                  |    |           | wt     | 2            | 17/22 | 3.124  | DAGTIAGLNVLR                 |
|                                 |                     |                   |          |                  |    |           | wt     | 2            | 17/20 | 2.916  | FDDAVVQSDMK                  |
|                                 |                     |                   |          |                  |    |           | wt     | 2            | 20/22 | 3.974  | DAGTIAGLNVLR                 |
|                                 |                     |                   |          |                  |    |           | wt     | 2            | 16/22 | 2.915  | DAGTIAGLNVLR                 |
|                                 |                     |                   |          |                  |    |           | wt     | 2            | 20/22 | 3.79   | DAGTIAGLNVLR                 |
|                                 |                     |                   |          |                  |    |           | wt     | 2            | 17/22 | 3.145  | DAGTIAGLNVLR                 |
|                                 |                     |                   |          |                  |    |           | wt     | 2            | 10/16 | 2.352  | EIAEAYLGK                    |
|                                 |                     |                   |          |                  |    |           | wt     | 2            | 14/18 | 2.858  | FEELNADLFR                   |
|                                 |                     |                   |          |                  |    |           | wt     | 2            | 16/20 | 3.653  | NSLESYAFNMK                  |
|                                 |                     |                   |          |                  |    |           | wt     | 2            | 14/18 | 3.055  | VQVEYKGETK                   |
|                                 |                     |                   |          |                  |    |           | wt     | 2            | 19/30 | 4.147  | STAGDTHLGGEDFDNR             |
|                                 |                     |                   |          |                  |    |           | wt     | 2            | 19/24 | 3.258  | TTPSYVAFTDTER                |
|                                 |                     |                   |          |                  |    |           | wt     | 2            | 23/28 | 4.394  | NQVAMNPTNTVFDAK              |
|                                 |                     |                   |          |                  |    |           | wt     | 2            | 19/24 | 2.843  | TTPSYVAFTDTER                |
|                                 |                     |                   |          |                  |    |           | wt     | 3            | 22/60 | 2.647  | STAGDTHLGGEDFDNR             |
| Heat shock protein 60 kDa       | P63038              | 60,955            | C        | 7                | 9  | 3         | ko     | 2            | 13/14 | 2.697  | VGEVIVTK                     |
|                                 |                     |                   |          |                  |    |           | ko     | 2            | 15/16 | 2.915  | VGLQVVAVK                    |
|                                 |                     |                   |          |                  |    |           | ko     | 2            | 18/22 | 2.818  | NAGVEGSLIVEK                 |
|                                 |                     |                   |          |                  |    |           | ko     | 2            | 15/16 | 2.954  | LSDGVAVLK                    |
|                                 |                     |                   |          |                  |    |           | ko     | 2            | 17/22 | 3.016  | TVIIQSWGSPK                  |
|                                 |                     |                   |          |                  |    |           | ko     | 2            | 15/16 | 3.398  | VTDALNATR                    |
|                                 |                     |                   |          |                  |    |           | ko     | 2            | 18/22 | 3.008  | GYISPYFINTSK                 |
|                                 |                     |                   |          |                  |    |           | wt     | 2            | 13/14 | 2.445  | VGEVIVTK                     |
|                                 |                     |                   |          |                  |    |           | wt     | 2            | 15/16 | 2.725  | LSDGVAVLK                    |
|                                 |                     |                   |          |                  |    |           | wt     | 2            | 15/16 | 3.377  | VTDALNATR                    |
|                                 |                     |                   |          |                  |    |           | wt     | 2            | 16/22 | 2.806  | TVIIQSWGSPK                  |
|                                 |                     |                   |          |                  |    |           | wt     | 2            | 19/22 | 3.597  | NAGVEGSLIVEK                 |
|                                 |                     |                   |          |                  |    |           | wt     | 2            | 15/16 | 3.329  | VTDALNATR                    |
|                                 |                     |                   |          |                  |    |           | wt     | 2            | 16/22 | 2.876  | GYISPYFINTSK                 |
|                                 |                     |                   |          |                  |    |           | wt     | 2            | 16/22 | 3.585  | VGGTSDVEVNEK                 |
|                                 |                     |                   |          |                  |    |           | wt     | 3            | 27/96 | 4.266  | LVQDVANNTNEEAGDGTTATVLA<br>R |
| Heat shock protein HSP 90-alpha | P07901              | 84,788            | A        | 4                | 9  | 2         | ko     | 2            | 17/22 | 3.0091 | ADLNNLGTIAK                  |
|                                 |                     |                   |          |                  |    |           | ko     | 2            | 10/18 | 1.9647 | RAPFDLFENR                   |
|                                 |                     |                   |          |                  |    |           | ko     | 2            | 11/20 | 2.0275 | DQVANSFAVER                  |
|                                 |                     |                   |          |                  |    |           | ko     | 2            | 20/26 | 4.0091 | GVVDSDELPLNISR               |
|                                 |                     |                   |          |                  |    |           | wt     | 2            | 10/12 | 2.0585 | ALLFVPR                      |
|                                 |                     |                   |          |                  |    |           | wt     | 2            | 7/12  | 1.5659 | FYEQFSK                      |
|                                 |                     |                   |          |                  |    |           | wt     | 2            | 13/16 | 2.9177 | YIDQEELNK                    |
|                                 |                     |                   |          |                  |    |           | wt     | 2            | 13/18 | 2.8267 | RAPFDLFENR                   |
|                                 |                     |                   |          |                  |    |           | wt     | 2            | 20/26 | 4.0296 | GVVDSDELPLNISR               |



| protein name                        | Swiss-Prot acc. no. | protein mass (Da) | data set | matched peptides |    | slice no. | sample | charge state | ions  | Xcorr  | assigned sequence  |
|-------------------------------------|---------------------|-------------------|----------|------------------|----|-----------|--------|--------------|-------|--------|--------------------|
|                                     |                     |                   |          | ko               | wt |           |        |              |       |        |                    |
|                                     |                     |                   |          |                  |    |           | wt     | 2            | 14/20 | 2.5452 | DQVANSFVER         |
|                                     |                     |                   |          |                  |    |           | wt     | 2            | 15/16 | 2.8428 | APFDLFENR          |
|                                     |                     |                   |          |                  |    |           | wt     | 2            | 19/28 | 3.6018 | NPDDITNEEYGEFYK    |
|                                     |                     |                   |          |                  |    |           | wt     | 2            | 21/24 | 4.1016 | TLTIVDTGIGM*TK     |
|                                     |                     |                   | B        | 4                | 3  | 2         | ko     | 2            | 15/20 | 2.548  | QLVEADINGLR        |
|                                     |                     |                   |          |                  |    |           | ko     | 2            | 12/22 | 2.389  | ELISNSSDALDK       |
|                                     |                     |                   |          |                  |    |           | ko     | 2            | 18/22 | 2.963  | ADLINNLGTIAK       |
|                                     |                     |                   |          |                  |    |           | ko     | 2            | 18/22 | 2.973  | ADLINNLGTIAK       |
|                                     |                     |                   |          |                  |    |           | wt     | 2            | 10/16 | 2.199  | APFDLFENK          |
|                                     |                     |                   |          |                  |    |           | wt     | 2            | 15/18 | 2.718  | SIYYITGESK         |
|                                     |                     |                   |          |                  |    |           | wt     | 2            | 16/20 | 2.067  | QLVEADINGLR        |
|                                     |                     |                   | C        | 9                | 2  | 2         | ko     | 2            | 11/12 | 2.05   | FYEAFSK            |
|                                     |                     |                   |          |                  |    |           | ko     | 2            | 12/16 | 2.397  | APFDLFENK          |
|                                     |                     |                   |          |                  |    |           | ko     | 2            | 18/28 | 3.986  | NPDDITQEEYGEFYK    |
|                                     |                     |                   |          |                  |    |           | ko     | 2            | 14/16 | 3.602  | YIDQEELNK          |
|                                     |                     |                   |          |                  |    |           | ko     | 2            | 14/22 | 2.373  | ADLINNLGTIAK       |
|                                     |                     |                   |          |                  |    |           | ko     | 2            | 16/22 | 2.996  | ELISNSSDALDK       |
|                                     |                     |                   |          |                  |    |           | ko     | 2            | 18/22 | 2.917  | ADLINNLGTIAK       |
|                                     |                     |                   |          |                  |    |           | ko     | 2            | 19/22 | 3.054  | ADLINNLGTIAK       |
|                                     |                     |                   |          |                  |    |           | ko     | 2            | 14/18 | 3.272  | EDQTEYLEER         |
|                                     |                     |                   |          |                  |    |           | wt     | 2            | 16/22 | 3.066  | ELISNSSDALDK       |
|                                     |                     |                   |          |                  |    |           | wt     | 2            | 15/18 | 3.068  | EDQTEYLEER         |
| Heat shock-related 70 kDa protein 2 | P17156              | 69,741            | A        | 3                | 3  | 2         | ko     | 2            | 22/32 | 4.4568 | IINEPTAAAIAAYGLDKK |
|                                     |                     |                   |          |                  |    |           | ko     | 2            | 14/18 | 2.7005 | FEELNADLFR         |
|                                     |                     |                   |          |                  |    |           | ko     | 3            | 23/44 | 3.5482 | ARFEELNADLFR       |
|                                     |                     |                   |          |                  |    |           | wt     | 2            | 14/22 | 2.4516 | ARFEELNADLFR       |
|                                     |                     |                   |          |                  |    |           | wt     | 2            | 14/18 | 2.7297 | FEELNADLFR         |
|                                     |                     |                   |          |                  |    |           | wt     | 2            | 17/30 | 3.7083 | STAGDTHLGGEDFDNR   |
| Hemoglobin subunit epsilon-Y2       | P02104              | 16,137            | C        | 2                | 2  | 6         | ko     | 2            | 20/24 | 2.942  | VNSDEVGGEALGR      |
|                                     |                     |                   |          |                  |    |           | ko     | 2            | 22/24 | 3.681  | VNSDEVGGEALGR      |
|                                     |                     |                   |          |                  |    |           | wt     | 2            | 22/24 | 3.209  | VNSDEVGGEALGR      |
|                                     |                     |                   |          |                  |    |           | wt     | 2            | 22/24 | 3.578  | VNSDEVGGEALGR      |
| Hexokinase-1                        | P17710              | 108,302           | A        | 1                | 2  | 1         | ko     | 2            | 13/20 | 2.7394 | GAAM*VTAVAYR       |
|                                     |                     |                   |          |                  |    |           | wt     | 2            | 12/18 | 2.6518 | FLLSESGGK          |
|                                     |                     |                   |          |                  |    |           | wt     | 2            | 15/20 | 2.6365 | GAAM*VTAVAYR       |
|                                     |                     |                   | C        | 3                | 2  | 1         | ko     | 2            | 12/14 | 2.024  | ITPELLTR           |
|                                     |                     |                   |          |                  |    |           | ko     | 2            | 17/20 | 2.743  | GAALITAVGVR        |
|                                     |                     |                   |          |                  |    |           | ko     | 2            | 16/20 | 2.732  | GAAMVTAVAYR        |
|                                     |                     |                   |          |                  |    |           | wt     | 2            | 17/20 | 2.727  | GAALITAVGVR        |
|                                     |                     |                   |          |                  |    |           | wt     | 2            | 17/20 | 2.633  | GAAMVTAVAYR        |
| Histone protein                     | P62806              | 11,367            | B        | 7                | 4  | 6         | ko     | 1            | 8/12  | 1.549  | TLYFGG             |
|                                     |                     |                   |          |                  |    |           | ko     | 2            | 12/18 | 2.351  | ISGLIYEETR         |
|                                     |                     |                   |          |                  |    |           | ko     | 2            | 15/18 | 3.219  | ISGLIYEETR         |
|                                     |                     |                   |          |                  |    |           | ko     | 2            | 18/22 | 2.165  | TVTAMDVVYALK       |

| protein name                                 | Swiss-Prot acc. no. | protein mass (Da) | data set | matched peptides |    | slice no. | sample | charge state | ions  | Xcorr  | assigned sequence |
|----------------------------------------------|---------------------|-------------------|----------|------------------|----|-----------|--------|--------------|-------|--------|-------------------|
|                                              |                     |                   |          | ko               | wt |           |        |              |       |        |                   |
|                                              |                     |                   |          |                  |    |           | ko     | 2            | 15/18 | 2.742  | ISGLIYEETR        |
|                                              |                     |                   |          |                  |    |           | ko     | 2            | 17/18 | 3.555  | ISGLIYEETR        |
|                                              |                     |                   |          |                  |    |           | ko     | 2            | 17/18 | 3.688  | ISGLIYEETR        |
|                                              |                     |                   |          |                  |    |           | wt     | 2            | 12/18 | 2.522  | ISGLIYEETR        |
|                                              |                     |                   |          |                  |    |           | wt     | 2            | 16/18 | 3.119  | ISGLIYEETR        |
|                                              |                     |                   |          |                  |    |           | wt     | 2            | 17/18 | 3.686  | ISGLIYEETR        |
|                                              |                     |                   |          |                  |    |           | wt     | 2            | 16/18 | 3.042  | ISGLIYEETR        |
| Hydroxysteroid 17-beta dehydrogenase 6       | Q9R092              | 36,103            | B        | 1                | 2  | 5         | ko     | 2            | 19/24 | 3.051  | AVANYDSVEAGEK     |
|                                              |                     |                   |          |                  |    |           | wt     | 2            | 18/24 | 3.097  | AVANYDSVEAGEK     |
|                                              |                     |                   |          |                  |    |           | wt     | 2            | 15/22 | 2.483  | SGSGEVYQGPAK      |
| Isocitrate dehydrogenase [NAD] subunit alpha | Q9D6R2              | 39,639            | A        | 2                | 1  | 4         | ko     | 2            | 16/22 | 2.4234 | TPYTDVNVITIR      |
|                                              |                     |                   |          |                  |    |           | ko     | 2            | 17/18 | 3.4927 | IAEFAFEYAR        |
|                                              |                     |                   |          |                  |    |           | wt     | 2            | 17/22 | 3.0472 | TPYTDVNVITIR      |
| LanC-like protein 1                          | O89112              | 45,341            | C        | 1                | 1  | 4         | ko     | 2            | 16/22 | 3.337  | SLAENYFDSTGR      |
|                                              |                     |                   |          |                  |    |           | wt     | 2            | 15/22 | 3.136  | SLAENYFDSTGR      |
| Large GTP binding protein                    | P58281              | 111,339           | B        | 1                | 2  | 1         | ko     | 2            | 15/20 | 2.841  | ALGYFAVVTGK       |
|                                              |                     |                   |          |                  |    |           | wt     | 2            | 15/20 | 2.58   | ESVEQQADSK        |
|                                              |                     |                   |          |                  |    |           | wt     | 2            | 15/20 | 2.37   | ALGYFAVVTGK       |
| L-lactate dehydrogenase B chain              | P16125              | 36,572            | C        | 2                | 1  | 4         | ko     | 2            | 16/18 | 2.302  | VLTPEEEAR         |
|                                              |                     |                   |          |                  |    |           | ko     | 2            | 16/18 | 2.525  | VLTPEEEAR         |
|                                              |                     |                   |          |                  |    |           | wt     | 2            | 16/18 | 2.282  | VLTPEEEAR         |
| Malate dehydrogenase, cytoplasmic            | P14152              | 36,511            | A        | 1                | 3  | 4         | ko     | 2            | 15/22 | 3.06   | FVEGLPINDFSR      |
|                                              |                     |                   |          |                  |    |           | wt     | 2            | 13/24 | 2.7244 | DLDVAVLVGSM*PR    |
|                                              |                     |                   |          |                  |    |           | wt     | 2            | 14/18 | 2.4772 | GEFITTVQQR        |
|                                              |                     |                   |          |                  |    |           | wt     | 2            | 19/22 | 3.3033 | FVEGLPINDFSR      |
| Malate dehydrogenase, mitochondrial          | P08249              | 35,611            | A        | 2                | 8  | 4         | ko     | 2            | 17/20 | 3.1346 | IFGVTTLDIVR       |
|                                              |                     |                   |          |                  |    |           | ko     | 2            | 16/30 | 2.7589 | AGAGSATLSM*AYAGAR |
|                                              |                     |                   |          |                  |    |           | wt     | 2            | 14/18 | 2.7118 | M*IAEAIPELK       |
|                                              |                     |                   |          |                  |    |           | wt     | 2            | 12/24 | 2.4636 | GYLGPEQLPDCLK     |
|                                              |                     |                   |          |                  |    |           | wt     | 2            | 13/16 | 2.7116 | ANTFVAELK         |
|                                              |                     |                   |          |                  |    |           | wt     | 2            | 12/18 | 2.8467 | IQEAGTEVVK        |
|                                              |                     |                   |          |                  |    |           | wt     | 2            | 17/20 | 3.516  | IFGVTTLDIVR       |
|                                              |                     |                   |          |                  |    |           | wt     | 2            | 19/24 | 4.0899 | GCDVVVIPAGVPR     |
|                                              |                     |                   |          |                  |    |           | wt     | 2            | 19/22 | 3.4715 | THPLISQCTPK       |
|                                              |                     |                   |          |                  |    |           | wt     | 2            | 20/26 | 3.9754 | VDFPQDQLATLTGR    |
| Mapsin                                       | P70124              | 42,111            | B        | 2                | 1  | 5         | ko     | 2            | 23/28 | 4.033  | DVPFGFQTVTSDVVK   |
|                                              |                     |                   |          |                  |    |           | ko     | 2            | 16/22 | 3.018  | ILVVNAAYFVGK      |
|                                              |                     |                   |          |                  |    |           | wt     | 2            | 17/20 | 2.365  | DVEDESTGLEK       |
| Microtubule-associated protein 1B            | P14873              | 270,411           | A        | 1                | 1  | 1         | ko     | 2            | 16/18 | 3.0446 | AVLDALLEGK        |

| protein name                    | Swiss-Prot acc. no. | protein mass (Da) | data set | matched peptides |    | slice no. | sample | charge state | ions  | Xcorr  | assigned sequence |
|---------------------------------|---------------------|-------------------|----------|------------------|----|-----------|--------|--------------|-------|--------|-------------------|
|                                 |                     |                   |          | ko               | wt |           |        |              |       |        |                   |
|                                 |                     |                   |          | 1                | 0  | 2         | ko     | 2            | 16/26 | 3.2631 | SVGNTIEPVILFQK    |
|                                 |                     |                   |          |                  |    |           | wt     | 2            | 15/26 | 3.2223 | SVGNTIEPVILFQK    |
| Mitochondrial stress-70 protein | P38647              | 73,528            | C        | 5                | 6  | 2         | ko     | 2            | 15/22 | 3.217  | DAGQISGLNVLK      |
|                                 |                     |                   |          |                  |    |           | ko     | 2            | 14/20 | 2.275  | VQQTVDLFGK        |
|                                 |                     |                   |          |                  |    |           | ko     | 2            | 16/20 | 3.304  | VQQTVDLFGK        |
|                                 |                     |                   |          |                  |    |           | ko     | 2            | 20/26 | 3.51   | QAVTNPNTFYATK     |
|                                 |                     |                   |          |                  |    |           | ko     | 2            | 19/26 | 3.6    | TTPSVVAFTADGER    |
|                                 |                     |                   |          |                  |    |           | wt     | 2            | 13/20 | 2.4    | VQQTVDLFGK        |
|                                 |                     |                   |          |                  |    |           | wt     | 2            | 16/22 | 3.767  | DAGQISGLNVLK      |
|                                 |                     |                   |          |                  |    |           | wt     | 2            | 14/20 | 3.135  | VQQTVDLFGK        |
|                                 |                     |                   |          |                  |    |           | wt     | 2            | 17/20 | 3.038  | VQQTVDLFGK        |
|                                 |                     |                   |          |                  |    |           | wt     | 2            | 16/26 | 3.373  | QAVTNPNTFYATK     |
|                                 |                     |                   |          |                  |    |           | wt     | 2            | 21/26 | 3.596  | TTPSVVAFTADGER    |
| Mu-crystallin                   | O54983              | 33,523            | B        | 0                | 1  | 4         | wt     | 2            | 10/16 | 2.099  | QAVLYVDSK         |
|                                 |                     |                   |          | 2                | 0  | 2         | ko     | 2            | 17/18 | 2.199  | FASTVQGDVQ        |
|                                 |                     |                   |          |                  |    |           | ko     | 2            | 13/16 | 2.307  | QAVLYVDSK         |
| Myelin basic protein            | Q62079              | 26,567            | A        | 3                | 4  | 5         | ko     | 1            | 10/18 | 1.5529 | DTGILDSIK         |
|                                 |                     |                   |          | 1                | 5  | 6         | ko     | 2            | 12/18 | 2.3426 | DTGILDSIK         |
|                                 |                     |                   |          |                  |    |           | ko     | 2            | 17/22 | 3.183  | TQDENPVVHFFK      |
|                                 |                     |                   |          |                  |    |           | ko     | 2            | 14/18 | 2.6532 | DTGILDSIK         |
|                                 |                     |                   |          |                  |    |           | wt     | 2            | 13/18 | 2.1749 | TTHYGSLPQK        |
|                                 |                     |                   |          |                  |    |           | wt     | 2            | 11/18 | 1.9057 | FFSGDRGAPK        |
|                                 |                     |                   |          |                  |    |           | wt     | 2            | 13/18 | 2.4625 | DTGILDSIK         |
|                                 |                     |                   |          |                  |    |           | wt     | 2            | 16/18 | 3.4852 | DTGILDSIK         |
|                                 |                     |                   |          |                  |    |           | wt     | 2            | 17/18 | 3.9204 | DTGILDSIK         |
|                                 |                     |                   |          |                  |    |           | wt     | 3            | 18/44 | 2.1562 | TQDENPVVHFFK      |
|                                 |                     |                   |          |                  |    |           | wt     | 3            | 19/44 | 3.0369 | HRDTGILDSIK       |
|                                 |                     |                   |          |                  |    |           | wt     | 3            | 20/44 | 3.3997 | HRDTGILDSIK       |
|                                 |                     |                   |          |                  |    |           | wt     | 3            | 25/44 | 3.3762 | TQDENPVVHFFK      |
|                                 |                     |                   | B        | 4                | 4  | 4         | ko     | 2            | 16/18 | 3.056  | DTGILDSIK         |
|                                 |                     |                   |          | 3                | 8  | 5         | ko     | 2            | 16/18 | 2.534  | DTGILDSIK         |
|                                 |                     |                   |          |                  |    |           | ko     | 2            | 16/18 | 2.905  | DTGILDSIK         |
|                                 |                     |                   |          |                  |    |           | ko     | 2            | 16/20 | 2.893  | GAYDAQGLSK        |
|                                 |                     |                   |          |                  |    |           | ko     | 2            | 15/20 | 2.834  | GAYDAQGLSK        |
|                                 |                     |                   |          |                  |    |           | ko     | 2            | 16/20 | 2.919  | GAYDAQGLSK        |
|                                 |                     |                   |          |                  |    |           | ko     | 2            | 10/18 | 2.144  | TTHYGSLPQK        |
|                                 |                     |                   |          |                  |    |           | wt     | 2            | 16/18 | 2.947  | DTGILDSIK         |
|                                 |                     |                   |          |                  |    |           | wt     | 2            | 13/18 | 2.657  | DTGILDSIK         |
|                                 |                     |                   |          |                  |    |           | wt     | 2            | 16/18 | 2.568  | DTGILDSIK         |
|                                 |                     |                   |          |                  |    |           | wt     | 2            | 17/18 | 3.049  | DTGILDSIK         |
|                                 |                     |                   |          |                  |    |           | wt     | 2            | 17/18 | 2.917  | DTGILDSIK         |
|                                 |                     |                   |          |                  |    |           | wt     | 2            | 16/18 | 2.429  | DTGILDSIK         |
|                                 |                     |                   |          |                  |    |           | wt     | 2            | 16/20 | 3.075  | GAYDAQGLSK        |
|                                 |                     |                   |          |                  |    |           | wt     | 2            | 16/20 | 3.233  | GAYDAQGLSK        |
|                                 |                     |                   |          |                  |    |           | wt     | 2            | 16/20 | 3.24   | GAYDAQGLSK        |

| protein name                              | Swiss-Prot acc. no. | protein mass (Da) | data set | matched peptides |    | slice no. | sample | charge state | ions  | Xcorr | assigned sequence        |
|-------------------------------------------|---------------------|-------------------|----------|------------------|----|-----------|--------|--------------|-------|-------|--------------------------|
|                                           |                     |                   |          | ko               | wt |           |        |              |       |       |                          |
|                                           |                     |                   |          |                  |    |           | wt     | 2            | 16/20 | 3.147 | GAYDAQGTLISK             |
|                                           |                     |                   |          |                  |    |           | wt     | 2            | 12/18 | 2.442 | TTHYGSLPQK               |
|                                           |                     |                   |          |                  |    |           | wt     | 2            | 12/18 | 2.392 | TTHYGSLPQK               |
|                                           |                     |                   | C        | 5                | 3  | 4         | ko     | 2            | 12/18 | 2.538 | TTHYGSLPQK               |
|                                           |                     |                   |          | 1                | 3  | 5         | ko     | 2            | 13/18 | 2.531 | DTGILDSIGR               |
|                                           |                     |                   |          |                  |    |           | ko     | 2            | 16/18 | 3.114 | DTGILDSIGR               |
|                                           |                     |                   |          |                  |    |           | ko     | 2            | 15/18 | 2.871 | DTGILDSIGR               |
|                                           |                     |                   |          |                  |    |           | ko     | 2            | 17/18 | 3.082 | DTGILDSIGR               |
|                                           |                     |                   |          |                  |    |           | wt     | 2            | 15/18 | 2.381 | DTGILDSIGR               |
|                                           |                     |                   |          |                  |    |           | wt     | 2            | 15/18 | 2.648 | DTGILDSIGR               |
|                                           |                     |                   |          |                  |    |           | wt     | 2            | 17/18 | 2.891 | DTGILDSIGR               |
|                                           |                     |                   |          |                  |    |           | wt     | 2            | 16/18 | 3.048 | DTGILDSIGR               |
|                                           |                     |                   |          |                  |    |           | wt     | 2            | 16/18 | 3.388 | DTGILDSIGR               |
|                                           |                     |                   |          |                  |    |           | wt     | 2            | 15/18 | 3.299 | DTGILDSIGR               |
| Myelin proteolipid protein                | P60202              | 26,274            | C        | 7                | 7  | 6         | ko     | 2            | 13/20 | 2.72  | LAPEYEAATR               |
|                                           |                     |                   |          |                  |    |           | ko     | 1            | 11/20 | 1.843 | GLSATVTGGQK              |
|                                           |                     |                   |          |                  |    |           | ko     | 2            | 17/20 | 2.681 | GLSATVTGGQK              |
|                                           |                     |                   |          |                  |    |           | ko     | 2            | 17/20 | 2.65  | GLSATVTGGQK              |
|                                           |                     |                   |          |                  |    |           | ko     | 2            | 14/20 | 2.178 | GLSATVTGGQK              |
|                                           |                     |                   |          |                  |    |           | ko     | 2            | 18/20 | 2.97  | GLSATVTGGQK              |
|                                           |                     |                   |          |                  |    |           | ko     | 2            | 17/20 | 3.266 | GLSATVTGGQK              |
|                                           |                     |                   |          |                  |    |           | wt     | 1            | 10/20 | 1.7   | GLSATVTGGQK              |
|                                           |                     |                   |          |                  |    |           | wt     | 2            | 17/20 | 2.278 | GLSATVTGGQK              |
|                                           |                     |                   |          |                  |    |           | wt     | 2            | 16/20 | 3.122 | GLSATVTGGQK              |
|                                           |                     |                   |          |                  |    |           | wt     | 2            | 17/20 | 2.596 | GLSATVTGGQK              |
|                                           |                     |                   |          |                  |    |           | wt     | 2            | 17/20 | 3.028 | GLSATVTGGQK              |
|                                           |                     |                   |          |                  |    |           | wt     | 2            | 16/20 | 3.129 | GLSATVTGGQK              |
|                                           |                     |                   |          |                  |    |           | wt     | 2            | 18/24 | 3.532 | TSASIGSLCADAR            |
| NAD-dependent deacetylase sirtuin-2       | Q8VDQ8              | 43,256            | C        | 1                | 3  | 4         | ko     | 2            | 20/22 | 3.435 | SPSTGLYANLEK             |
|                                           |                     |                   |          |                  |    |           | wt     | 2            | 16/24 | 2.267 | NLFTQTLGLGSQK            |
|                                           |                     |                   |          |                  |    |           | wt     | 2            | 19/22 | 3.122 | SPSTGLYANLEK             |
|                                           |                     |                   |          |                  |    |           | wt     | 3            | 38/92 | 4.67  | EHANIDAQSGSQAPNPSTTISPGK |
| N-ethylmaleimide sensitive fusion protein | P46460              | 82,613            | B        | 8                | 14 | 2         | ko     | 2            | 15/18 | 2.462 | YVGESEANIR               |
|                                           |                     |                   |          |                  |    |           | ko     | 2            | 16/20 | 2.973 | AENSSLNLIGK              |
|                                           |                     |                   |          |                  |    |           | ko     | 2            | 12/20 | 2.389 | NIDSNPYDTDK              |
|                                           |                     |                   |          |                  |    |           | ko     | 2            | 17/24 | 3.179 | SQLSCVVDDIER             |
|                                           |                     |                   |          |                  |    |           | ko     | 2            | 17/24 | 3.492 | VLDDGELLVQQTK            |
|                                           |                     |                   |          |                  |    |           | ko     | 2            | 19/24 | 3.718 | VLDDGELLVQQTK            |
|                                           |                     |                   |          |                  |    |           | ko     | 2            | 15/18 | 2.32  | LLDYVPIGPR               |
|                                           |                     |                   |          |                  |    |           | ko     | 2            | 15/20 | 2.727 | NIDSNPYDTDK              |
|                                           |                     |                   |          |                  |    |           | wt     | 1            | 10/18 | 1.612 | EEGASPLDFD               |
|                                           |                     |                   |          |                  |    |           | wt     | 2            | 16/18 | 2.932 | LFADAEER                 |
|                                           |                     |                   |          |                  |    |           | wt     | 2            | 16/18 | 2.54  | YVGESEANIR               |
|                                           |                     |                   |          |                  |    |           | wt     | 2            | 15/20 | 2.85  | AENSSLNLIGK              |
|                                           |                     |                   |          |                  |    |           | wt     | 2            | 17/20 | 3.264 | AENSSLNLIGK              |

| protein name | Swiss-Prot<br>acc. no. | protein<br>mass<br>(Da) | data<br>set | matched<br>peptides |    | slice<br>no. | sample | charge<br>state | ions  | Xcorr | assigned sequence |
|--------------|------------------------|-------------------------|-------------|---------------------|----|--------------|--------|-----------------|-------|-------|-------------------|
|              |                        |                         |             | ko                  | wt |              |        |                 |       |       |                   |
|              |                        |                         |             |                     |    |              | wt     | 2               | 15/22 | 2.689 | GILLYGPPGCGK      |
|              |                        |                         |             |                     |    |              | wt     | 2               | 14/18 | 2.388 | LLDYVPIGPR        |
|              |                        |                         |             |                     |    |              | wt     | 2               | 14/20 | 2.833 | NIDSNPYDTDK       |
|              |                        |                         |             |                     |    |              | wt     | 2               | 14/18 | 2.405 | LLDYVPIGPR        |
|              |                        |                         |             |                     |    |              | wt     | 2               | 15/20 | 2.268 | NIDSNPYDTDK       |
|              |                        |                         |             |                     |    |              | wt     | 2               | 17/24 | 3.425 | VLDGELLVQGTK      |
|              |                        |                         |             |                     |    |              | wt     | 2               | 20/24 | 3.795 | SQLSCVVDDIER      |
|              |                        |                         |             |                     |    |              | wt     | 2               | 19/24 | 3.602 | VLDGELLVQGTK      |
|              |                        |                         |             |                     |    |              | wt     | 2               | 21/24 | 4.097 | SQLSCVVDDIER      |
|              |                        |                         | C           | 19                  | 20 | 2            | ko     | 1               | 8/18  | 2.03  | EEGASPLDFD        |
|              |                        |                         |             |                     |    |              | ko     | 2               | 12/20 | 2.855 | IAEESNPFPIK       |
|              |                        |                         |             |                     |    |              | ko     | 2               | 13/20 | 2.404 | DIEAMDPSILK       |
|              |                        |                         |             |                     |    |              | ko     | 2               | 13/16 | 2.053 | MIGFSETAK         |
|              |                        |                         |             |                     |    |              | ko     | 2               | 12/20 | 2.404 | IAEESNPFPIK       |
|              |                        |                         |             |                     |    |              | ko     | 2               | 13/18 | 2.597 | LLDYVPIGPR        |
|              |                        |                         |             |                     |    |              | ko     | 2               | 16/22 | 2.802 | NFSGAELEGLVR      |
|              |                        |                         |             |                     |    |              | ko     | 2               | 16/20 | 2.678 | AENSSLNLIGK       |
|              |                        |                         |             |                     |    |              | ko     | 2               | 16/20 | 2.509 | AENSSLNLIGK       |
|              |                        |                         |             |                     |    |              | ko     | 2               | 17/20 | 3.293 | AENSSLNLIGK       |
|              |                        |                         |             |                     |    |              | ko     | 2               | 15/24 | 2.271 | VLDGELLVQGTK      |
|              |                        |                         |             |                     |    |              | ko     | 2               | 20/24 | 3.903 | VLDGELLVQGTK      |
|              |                        |                         |             |                     |    |              | ko     | 2               | 13/20 | 2.279 | NIDSNPYDTDK       |
|              |                        |                         |             |                     |    |              | ko     | 2               | 15/20 | 2.742 | NIDSNPYDTDK       |
|              |                        |                         |             |                     |    |              | ko     | 2               | 18/24 | 3.68  | VLDGELLVQGTK      |
|              |                        |                         |             |                     |    |              | ko     | 2               | 14/18 | 2.928 | VVNGPEILNK        |
|              |                        |                         |             |                     |    |              | ko     | 2               | 14/18 | 2.387 | VVNGPEILNK        |
|              |                        |                         |             |                     |    |              | ko     | 2               | 15/20 | 3.101 | NIDSNPYDTDK       |
|              |                        |                         |             |                     |    |              | ko     | 2               | 15/20 | 2.916 | NIDSNPYDTDK       |
|              |                        |                         |             |                     |    |              | wt     | 1               | 12/24 | 1.723 | VLDGELLVQGTK      |
|              |                        |                         |             |                     |    |              | wt     | 1               | 9/18  | 1.984 | EEGASPLDFD        |
|              |                        |                         |             |                     |    |              | wt     | 1               | 10/18 | 2.023 | EEGASPLDFD        |
|              |                        |                         |             |                     |    |              | wt     | 2               | 15/18 | 2.566 | LLDYVPIGPR        |
|              |                        |                         |             |                     |    |              | wt     | 2               | 12/18 | 2.46  | LLDYVPIGPR        |
|              |                        |                         |             |                     |    |              | wt     | 2               | 16/18 | 3.183 | LFADAEER          |
|              |                        |                         |             |                     |    |              | wt     | 2               | 18/22 | 3.6   | NFSGAELEGLVR      |
|              |                        |                         |             |                     |    |              | wt     | 2               | 13/24 | 2.409 | VLDGELLVQGTK      |
|              |                        |                         |             |                     |    |              | wt     | 2               | 16/22 | 2.954 | NFSGAELEGLVR      |
|              |                        |                         |             |                     |    |              | wt     | 2               | 13/20 | 2.901 | IAEESNPFPIK       |
|              |                        |                         |             |                     |    |              | wt     | 2               | 11/18 | 2.025 | LLDYVPIGPR        |
|              |                        |                         |             |                     |    |              | wt     | 2               | 15/20 | 3.221 | NIDSNPYDTDK       |
|              |                        |                         |             |                     |    |              | wt     | 2               | 13/18 | 2.725 | VVNGPEILNK        |
|              |                        |                         |             |                     |    |              | wt     | 2               | 16/18 | 2.81  | LLDYVPIGPR        |
|              |                        |                         |             |                     |    |              | wt     | 2               | 15/18 | 2.665 | VVNGPEILNK        |
|              |                        |                         |             |                     |    |              | wt     | 2               | 17/24 | 3.68  | VLDGELLVQGTK      |
|              |                        |                         |             |                     |    |              | wt     | 2               | 21/24 | 3.619 | VLDGELLVQGTK      |
|              |                        |                         |             |                     |    |              | wt     | 2               | 18/24 | 3.841 | VLDGELLVQGTK      |
|              |                        |                         |             |                     |    |              | wt     | 2               | 15/20 | 2.824 | NIDSNPYDTDK       |
|              |                        |                         |             |                     |    |              | wt     | 2               | 14/20 | 3.29  | NIDSNPYDTDK       |

| protein name                              | Swiss-Prot acc. no. | protein mass (Da) | data set | matched peptides |    | slice no. | sample | charge state | ions  | Xcorr  | assigned sequence       |
|-------------------------------------------|---------------------|-------------------|----------|------------------|----|-----------|--------|--------------|-------|--------|-------------------------|
|                                           |                     |                   |          | ko               | wt |           |        |              |       |        |                         |
| Neurofascin                               | Q810U3              | 137,975           | A        | 1                | 1  | 1         | ko     | 2            | 13/28 | 2.9524 | YVVGQTPVYVPEIR          |
|                                           |                     |                   |          |                  |    |           | wt     | 2            | 16/18 | 3.2833 | DLELTDLAER              |
| Neurofilament protein NF-L                | P08551              | 61,508            | B        | 1                | 1  | 3         | ko     | 2            | 13/18 | 2.271  | LAAEDATNEK              |
|                                           |                     |                   |          |                  |    |           | wt     | 2            | 14/18 | 2.468  | LAAEDATNEK              |
| Neuroglycan C                             | Q71M36              | 60,419            | C        | 1                | 1  | 3         | ko     | 2            | 18/24 | 3.028  | ETGSAIEAELVR            |
|                                           |                     |                   |          |                  |    |           | wt     | 2            | 19/24 | 3.355  | ETGSAIEAELVR            |
| Neuroplastin precursor                    | P97300              | 31,277            | C        | 1                | 1  | 3         | ko     | 2            | 14/16 | 2.581  | NGVELTATR               |
|                                           |                     |                   |          |                  |    |           | wt     | 2            | 14/16 | 2.78   | NGVELTATR               |
| NIPSNAP1 protein                          | O55125              | 33,363            | C        | 1                | 1  | 4         | ko     | 2            | 14/16 | 2.556  | AGPNIELR                |
|                                           |                     |                   |          |                  |    |           | wt     | 2            | 14/16 | 3.098  | AGPNIELR                |
| Nonselenium glutathione peroxidase        | O08709              | 24,871            | C        | 1                | 1  | 5         | ko     | 2            | 17/24 | 3.581  | DINAYNGETPTEK           |
|                                           |                     |                   |          |                  |    |           | wt     | 2            | 17/24 | 4.302  | DINAYNGETPTEK           |
| Nucleolin                                 | P09405              | 76,723            | C        | 3                | 2  | 2         | ko     | 2            | 14/26 | 2.518  | GFGFVDFNSEEDAK          |
|                                           |                     |                   |          |                  |    |           | ko     | 2            | 15/16 | 2.894  | NDLAVVDVR               |
|                                           |                     |                   |          |                  |    |           | ko     | 2            | 20/24 | 3.352  | TLVLSNLSYSATK           |
|                                           |                     |                   |          |                  |    |           | wt     | 2            | 15/16 | 3.001  | NDLAVVDVR               |
|                                           |                     |                   |          |                  |    |           | wt     | 2            | 20/24 | 3.705  | TLVLSNLSYSATK           |
| PACSIN                                    | Q61644              | 50,575            | B        | 0                | 1  | 3         | wt     | 2            | 11/16 | 2.408  | GPQYGLSER               |
|                                           |                     |                   |          |                  |    |           | ko     | 2            | 12/16 | 2.468  | GPQYGLSER               |
|                                           |                     |                   | C        | 3                | 1  | 3         | ko     | 3            | 28/88 | 3.641  | KAEGATLSNATGAVESTSQAGDR |
|                                           |                     |                   |          |                  |    |           | ko     | 2            | 15/18 | 2.788  | NSLLNEDLEK              |
|                                           |                     |                   |          |                  |    |           | wt     | 2            | 12/16 | 2.343  | GPQYGLSER               |
| PEA-15                                    | Q62048              | 15,054            | B        | 0                | 1  | 6         | wt     | 2            | 13/18 | 2.532  | ISEEEELDTK              |
|                                           |                     |                   |          |                  |    |           | ko     | 2            | 15/18 | 2.958  | ISEEEELDTK              |
|                                           |                     |                   | C        | 1                | 1  | 6         | wt     | 2            | 15/18 | 3.007  | ISEEEELDTK              |
| Peanut                                    | Q9Z2Q6              | 42,748            | C        | 1                | 1  | 4         | ko     | 2            | 18/22 | 3.896  | DVTNNVHYENYR            |
|                                           |                     |                   |          |                  |    |           | wt     | 2            | 17/22 | 3.568  | DVTNNVHYENYR            |
| Peroxisomal multifunctional enzyme type 2 | P51660              | 79,482            | B        | 1                | 1  | 3         | ko     | 2            | 20/24 | 3.305  | VVLVTGAGGGLGR           |
|                                           |                     |                   |          |                  |    |           | wt     | 2            | 21/24 | 3.384  | VVLVTGAGGGLGR           |
| Plakoglobin                               | Q02257              | 81,801            | B        | 9                | 5  | 2         | ko     | 2            | 11/20 | 2.126  | VSVELTNSLFK             |
|                                           |                     |                   |          |                  |    |           | ko     | 2            | 14/22 | 2.185  | HPEAEMAQNSVR            |
|                                           |                     |                   |          |                  |    |           | ko     | 2            | 17/22 | 2.651  | LLNDEDPVVVTK            |
|                                           |                     |                   |          |                  |    |           | ko     | 2            | 15/26 | 2.558  | NEGATYAAAVLFR           |
|                                           |                     |                   |          |                  |    |           | ko     | 2            | 17/20 | 2.599  | VSVELTNSLFK             |
|                                           |                     |                   |          |                  |    |           | ko     | 2            | 18/22 | 3.136  | TMQNTSDLDTAR            |
| ko                                        | 2                   | 20/26             | 3.626    | ALMGSPQLVAAVVR   |    |           |        |              |       |        |                         |

| protein name                                  | Swiss-Prot acc. no. | protein mass (Da) | data set | matched peptides |    | slice no. | sample | charge state | ions  | Xcorr | assigned sequence |
|-----------------------------------------------|---------------------|-------------------|----------|------------------|----|-----------|--------|--------------|-------|-------|-------------------|
|                                               |                     |                   |          | ko               | wt |           |        |              |       |       |                   |
|                                               |                     |                   |          |                  |    |           | ko     | 2            | 15/22 | 2.667 | LLNDEDPVVVTK      |
|                                               |                     |                   |          |                  |    |           | ko     | 2            | 18/22 | 3.071 | TMQNTSDLDLTAR     |
|                                               |                     |                   |          |                  |    |           | wt     | 2            | 17/22 | 2.207 | LLNDEDPVVVTK      |
|                                               |                     |                   |          |                  |    |           | wt     | 2            | 15/22 | 2.198 | LLNDEDPVVVTK      |
|                                               |                     |                   |          |                  |    |           | wt     | 2            | 16/22 | 2.335 | LLNDEDPVVVTK      |
|                                               |                     |                   |          |                  |    |           | wt     | 2            | 16/22 | 2.834 | TMQNTSDLDLTAR     |
|                                               |                     |                   |          |                  |    |           | wt     | 2            | 16/20 | 2.19  | VSVELTNSLTK       |
| Plakophilin-1                                 | P97350              | 80,896            | B        | 1                | 1  | 4         | ko     | 2            | 15/20 | 2.486 | ELLIIGGVAAR       |
|                                               |                     |                   |          | 0                | 2  | 5         | wt     | 2            | 20/26 | 3.993 | AQSELSGAADAAAR    |
|                                               |                     |                   |          |                  |    |           | wt     | 2            | 16/18 | 2.69  | GIVDSITGQR        |
|                                               |                     |                   |          |                  |    |           | wt     | 2            | 13/18 | 2.107 | GIVDSITGQR        |
| Plasma membrane calcium-transporting ATPase 2 | Q9R0K7              | 132,588           | C        | 9                | 11 | 1         | ko     | 2            | 22/26 | 4.213 | IDESSLTGESDQVR    |
|                                               |                     |                   |          |                  |    |           | ko     | 2            | 19/20 | 3.388 | MVTGDNINTAR       |
|                                               |                     |                   |          |                  |    |           | ko     | 2            | 19/20 | 3.511 | MVTGDNINTAR       |
|                                               |                     |                   |          |                  |    |           | ko     | 2            | 23/30 | 4.052 | TSPNEGLSGNPADLER  |
|                                               |                     |                   |          |                  |    |           | ko     | 2            | 22/32 | 4.008 | QVAVTGDGTNDGPALK  |
|                                               |                     |                   |          |                  |    |           | ko     | 2            | 23/32 | 4.203 | QVAVTGDGTNDGPALK  |
|                                               |                     |                   |          |                  |    |           | ko     | 2            | 18/32 | 3.518 | EASDIILTDDNFSSIVK |
|                                               |                     |                   |          |                  |    |           | ko     | 2            | 20/30 | 2.746 | TSPVEGLPGTAPDLEK  |
|                                               |                     |                   |          |                  |    |           | ko     | 2            | 18/26 | 3.613 | IDESSLTGESDQVR    |
|                                               |                     |                   |          |                  |    |           | wt     | 2            | 21/30 | 3.659 | TSPNEGLSGNPADLER  |
|                                               |                     |                   |          |                  |    |           | wt     | 2            | 18/20 | 3.036 | MVTGDNINTAR       |
|                                               |                     |                   |          |                  |    |           | wt     | 2            | 12/14 | 2.09  | FFDIDSGR          |
|                                               |                     |                   |          |                  |    |           | wt     | 2            | 23/30 | 3.575 | TSPNEGLSGNPADLER  |
|                                               |                     |                   |          |                  |    |           | wt     | 2            | 23/32 | 4.528 | QVAVTGDGTNDGPALK  |
|                                               |                     |                   |          |                  |    |           | wt     | 2            | 23/32 | 3.771 | QVAVTGDGTNDGPALK  |
|                                               |                     |                   |          |                  |    |           | wt     | 2            | 15/20 | 2.362 | GIIDSTHTEQR       |
|                                               |                     |                   |          |                  |    |           | wt     | 2            | 18/30 | 2.857 | TSPVEGLPGTAPDLEK  |
|                                               |                     |                   |          |                  |    |           | wt     | 2            | 17/30 | 2.808 | TSPVEGLPGTAPDLEK  |
|                                               |                     |                   |          |                  |    |           | wt     | 2            | 20/26 | 2.963 | IDESSLTGESDQVR    |
|                                               |                     |                   |          |                  |    |           | wt     | 2            | 23/26 | 3.454 | IDESSLTGESDQVR    |
| Profilin II                                   | Q9JJV2              | 15,032            | B        | 2                | 3  |           | ko     | 2            | 18/26 | 2.117 | SQGGPEPTYNVAVGR   |
|                                               |                     |                   |          |                  |    |           | ko     | 2            | 17/26 | 3.015 | SQGGPEPTYNVAVGR   |
|                                               |                     |                   |          |                  |    |           | wt     | 2            | 18/26 | 2.749 | SQGGPEPTYNVAVGR   |
|                                               |                     |                   |          |                  |    |           | wt     | 2            | 17/26 | 3.468 | SQGGPEPTYNVAVGR   |
|                                               |                     |                   |          |                  |    |           | wt     | 2            | 19/26 | 3.638 | SQGGPEPTYNVAVGR   |
| Proliferation associated gene (pag)           | Q60848              | 95,126            | B        | 3                | 6  | 5         | ko     | 2            | 14/20 | 2.286 | QITVNDLPVGR       |
|                                               |                     |                   |          |                  |    |           | ko     | 2            | 12/14 | 2.189 | ADEGISFR          |
|                                               |                     |                   |          |                  |    |           | ko     | 2            | 16/18 | 3.1   | LVQAFQFTDK        |
|                                               |                     |                   |          |                  |    |           | wt     | 2            | 11/14 | 2.119 | ADEGISFR          |
|                                               |                     |                   |          |                  |    |           | wt     | 2            | 12/20 | 2.285 | QITVNDLPVGR       |
|                                               |                     |                   |          |                  |    |           | wt     | 2            | 11/14 | 2.372 | GLFIHDDK          |
|                                               |                     |                   |          |                  |    |           | wt     | 2            | 15/18 | 2.7   | LVQAFQFTDK        |
|                                               |                     |                   |          |                  |    |           | wt     | 2            | 13/20 | 2.163 | QITVNDLPVGR       |

| protein name                                            | Swiss-Prot acc. no. | protein mass (Da) | data set | matched peptides |    | slice no. | sample | charge state | ions  | Xcorr | assigned sequence |
|---------------------------------------------------------|---------------------|-------------------|----------|------------------|----|-----------|--------|--------------|-------|-------|-------------------|
|                                                         |                     |                   |          | ko               | wt |           |        |              |       |       |                   |
|                                                         |                     |                   |          |                  |    |           | wt     | 2            | 12/14 | 2.17  | ADEGISFR          |
|                                                         |                     |                   | C        | 2                | 3  | 5         | ko     | 2            | 14/20 | 2.434 | QITVNDLPVGR       |
|                                                         |                     |                   |          |                  |    |           | ko     | 2            | 12/14 | 2.872 | ADEGISFR          |
|                                                         |                     |                   |          |                  |    |           | wt     | 2            | 14/20 | 2.421 | ATAVMPDGQFK       |
|                                                         |                     |                   |          |                  |    |           | wt     | 2            | 13/20 | 2.463 | QITVNDLPVGR       |
|                                                         |                     |                   |          |                  |    |           | wt     | 2            | 13/14 | 2.626 | ADEGISFR          |
| Propionyl Coenzyme A carboxylase, alpha                 | Q91ZA3              | 79,922            | C        | 8                | 8  | 2         | ko     | 2            | 15/18 | 2.312 | HIEIQLGDK         |
|                                                         |                     |                   |          |                  |    |           | ko     | 2            | 11/14 | 2.056 | VYAEOPYK          |
|                                                         |                     |                   |          |                  |    |           | ko     | 2            | 12/14 | 2.203 | VYAEOPYK          |
|                                                         |                     |                   |          |                  |    |           | ko     | 2            | 15/28 | 2.671 | VVEEAPSIFLDPETR   |
|                                                         |                     |                   |          |                  |    |           | ko     | 2            | 15/18 | 2.31  | HIEIQLGDK         |
|                                                         |                     |                   |          |                  |    |           | ko     | 2            | 16/28 | 2.968 | AGDTVGEGLLVELE    |
|                                                         |                     |                   |          |                  |    |           | ko     | 2            | 19/26 | 3.069 | FSSQEAASSFGDDR    |
|                                                         |                     |                   |          |                  |    |           | ko     | 2            | 20/28 | 3.866 | VVEEAPSIFLDPETR   |
|                                                         |                     |                   |          |                  |    |           | wt     | 2            | 11/20 | 2.048 | FLSDVYPDFK        |
|                                                         |                     |                   |          |                  |    |           | wt     | 2            | 11/20 | 2.172 | FLSDVYPDFK        |
|                                                         |                     |                   |          |                  |    |           | wt     | 2            | 12/14 | 2.2   | VYAEOPYK          |
|                                                         |                     |                   |          |                  |    |           | wt     | 2            | 13/28 | 2.545 | VVEEAPSIFLDPETR   |
|                                                         |                     |                   |          |                  |    |           | wt     | 2            | 18/28 | 3.756 | YSSAGTVEFLVDSQK   |
|                                                         |                     |                   |          |                  |    |           | wt     | 2            | 18/28 | 2.895 | VVEEAPSIFLDPETR   |
|                                                         |                     |                   |          |                  |    |           | wt     | 2            | 23/26 | 3.707 | FSSQEAASSFGDDR    |
|                                                         |                     |                   |          |                  |    |           | wt     | 2            | 21/26 | 3.905 | FSSQEAASSFGDDR    |
| Propionyl Coenzyme A carboxylase, beta                  | Q8CFZ3              | 58,376            | C        | 4                | 5  | 2         | ko     | 2            | 24/28 | 5.205 | GHQDVEAAQAEYVEK   |
|                                                         |                     |                   |          | 4                | 3  | 3         | ko     | 3            | 27/56 | 3.777 | GHQDVEAAQAEYVEK   |
|                                                         |                     |                   |          |                  |    |           | ko     | 2            | 21/26 | 4.492 | FSSQEAASSFGDDR    |
|                                                         |                     |                   |          |                  |    |           | ko     | 2            | 15/24 | 3.506 | GFVDDIIQPSSTR     |
|                                                         |                     |                   |          |                  |    |           | ko     | 2            | 18/24 | 4.53  | GFVDDIIQPSSTR     |
|                                                         |                     |                   |          |                  |    |           | ko     | 2            | 19/22 | 2.867 | AYGGAYDVMSK       |
|                                                         |                     |                   |          |                  |    |           | ko     | 2            | 20/30 | 5.112 | SVTNEDVTQEQLGGAK  |
|                                                         |                     |                   |          |                  |    |           | ko     | 2            | 18/28 | 2.516 | LVPELDTVVPLESSK   |
|                                                         |                     |                   |          |                  |    |           | wt     | 2            | 24/28 | 5.239 | GHQDVEAAQAEYVEK   |
|                                                         |                     |                   |          |                  |    |           | wt     | 2            | 17/26 | 3.915 | DTSYLFITGPEVVK    |
|                                                         |                     |                   |          |                  |    |           | wt     | 2            | 16/24 | 3.376 | GFVDDIIQPSSTR     |
|                                                         |                     |                   |          |                  |    |           | wt     | 2            | 16/24 | 3.902 | GFVDDIIQPSSTR     |
|                                                         |                     |                   |          |                  |    |           | wt     | 2            | 19/22 | 3.808 | AYGGAYDVMSK       |
|                                                         |                     |                   |          |                  |    |           | wt     | 2            | 15/28 | 2.522 | LVPELDTVVPLESSK   |
|                                                         |                     |                   |          |                  |    |           | wt     | 2            | 20/28 | 2.153 | LVPELDTVVPLESSK   |
|                                                         |                     |                   |          |                  |    |           | wt     | 2            | 21/30 | 5.273 | SVTNEDVTQEQLGGAK  |
| Protein-L-isoaspartate(D-aspartate) O-methyltransferase | P23506              | 24,634            | B        | 0                | 1  | 6         | wt     | 2            | 14/20 | 2.305 | ELVDDISITNVK      |
|                                                         |                     |                   | C        | 8                | 15 | 5         | ko     | 2            | 14/20 | 2.067 | ELVDDISITNVK      |
|                                                         |                     |                   |          |                  |    |           | ko     | 2            | 16/20 | 2.888 | ELVDDISITNVK      |
|                                                         |                     |                   |          |                  |    |           | ko     | 2            | 16/20 | 2.719 | ELVDDISITNVK      |
|                                                         |                     |                   |          |                  |    |           | ko     | 2            | 16/20 | 2.888 | ELVDDISITNVK      |
|                                                         |                     |                   |          |                  |    |           | ko     | 2            | 16/20 | 2.719 | ELVDDISITNVK      |
|                                                         |                     |                   |          |                  |    |           | ko     | 2            | 15/18 | 2.265 | DDPMLLSSGR        |



| protein name         | Swiss-Prot acc. no. | protein mass (Da) | data set | matched peptides |    | slice no. | sample | charge state | ions  | Xcorr  | assigned sequence |
|----------------------|---------------------|-------------------|----------|------------------|----|-----------|--------|--------------|-------|--------|-------------------|
|                      |                     |                   |          | ko               | wt |           |        |              |       |        |                   |
|                      |                     |                   |          |                  |    |           | ko     | 2            | 14/20 | 2.067  | ELVDD SITNVK      |
|                      |                     |                   |          |                  |    |           | ko     | 3            | 27/52 | 3.606  | SGGASHSELIHNLR    |
|                      |                     |                   |          |                  |    |           | wt     | 1            | 12/20 | 1.881  | ELVDD SITNVK      |
|                      |                     |                   |          |                  |    |           | wt     | 1            | 11/20 | 2.344  | ELVDD SITNVK      |
|                      |                     |                   |          |                  |    |           | wt     | 2            | 14/20 | 3.098  | ELVDD SITNVK      |
|                      |                     |                   |          |                  |    |           | wt     | 2            | 14/18 | 2.325  | DDPMLSSGR         |
|                      |                     |                   |          |                  |    |           | wt     | 2            | 16/18 | 2.345  | DDPMLSSGR         |
|                      |                     |                   |          |                  |    |           | wt     | 2            | 16/20 | 2.658  | ELVDD SITNVK      |
|                      |                     |                   |          |                  |    |           | wt     | 2            | 16/20 | 2.692  | ELVDD SITNVK      |
|                      |                     |                   |          |                  |    |           | wt     | 2            | 16/20 | 2.692  | ELVDD SITNVK      |
|                      |                     |                   |          |                  |    |           | wt     | 2            | 14/18 | 2.325  | DDPMLSSGR         |
|                      |                     |                   |          |                  |    |           | wt     | 2            | 14/20 | 3.098  | ELVDD SITNVK      |
|                      |                     |                   |          |                  |    |           | wt     | 1            | 12/20 | 1.881  | ELVDD SITNVK      |
|                      |                     |                   |          |                  |    |           | wt     | 1            | 11/20 | 2.344  | ELVDD SITNVK      |
|                      |                     |                   |          |                  |    |           | wt     | 2            | 16/20 | 2.658  | ELVDD SITNVK      |
|                      |                     |                   |          |                  |    |           | wt     | 2            | 16/18 | 2.345  | DDPMLSSGR         |
|                      |                     |                   |          |                  |    |           | wt     | 3            | 24/52 | 2.84   | SGGASHSELIHNLR    |
| Pyruvate carboxylase | Q05920              | 129,685           | A        | 2                | 2  | 1         | ko     | 2            | 17/26 | 3.2876 | AEAEQAEELSFPR     |
|                      |                     |                   |          |                  |    |           | ko     | 2            | 17/28 | 3.9881 | DFTATFGPLDSL NTR  |
|                      |                     |                   |          |                  |    |           | wt     | 2            | 14/22 | 2.2171 | GTPLDTEVPLER      |
|                      |                     |                   |          |                  |    |           | wt     | 2            | 16/28 | 2.8289 | DFTATFGPLDSL NTR  |
| Pyruvate carboxylase |                     |                   | C        | 17               | 17 | 1         | ko     | 1            | 12/22 | 1.543  | GTPLDTEVPLER      |
|                      |                     |                   |          |                  |    |           | ko     | 1            | 12/22 | 2.248  | GTPLDTEVPLER      |
|                      |                     |                   |          |                  |    |           | ko     | 2            | 12/20 | 3.066  | IAPYVAHFNK        |
|                      |                     |                   |          |                  |    |           | ko     | 2            | 14/16 | 2.114  | HYFIEVNSR         |
|                      |                     |                   |          |                  |    |           | ko     | 2            | 15/22 | 2.787  | SSSAPVASPNVR      |
|                      |                     |                   |          |                  |    |           | ko     | 2            | 14/16 | 2.374  | ALAVSDLNR         |
|                      |                     |                   |          |                  |    |           | ko     | 2            | 14/20 | 2.535  | PGASLPPLNLK       |
|                      |                     |                   |          |                  |    |           | ko     | 2            | 14/20 | 2.046  | QKADEAYLIGR       |
|                      |                     |                   |          |                  |    |           | ko     | 2            | 17/22 | 3.055  | GTPLDTEVPLER      |
|                      |                     |                   |          |                  |    |           | ko     | 2            | 15/18 | 2.595  | GQIGAPMPGK        |
|                      |                     |                   |          |                  |    |           | ko     | 2            | 14/16 | 2.764  | HYFIEVNSR         |
|                      |                     |                   |          |                  |    |           | ko     | 2            | 15/16 | 3.345  | ADEAYLIGR         |
|                      |                     |                   |          |                  |    |           | ko     | 2            | 19/24 | 4.187  | ADFAQACQDAGVR     |
|                      |                     |                   |          |                  |    |           | ko     | 2            | 16/28 | 3.392  | DFTATFGPLDSL NTR  |
|                      |                     |                   |          |                  |    |           | ko     | 2            | 21/26 | 4.522  | AEAEQAEELSFPR     |
|                      |                     |                   |          |                  |    |           | ko     | 2            | 19/28 | 4.272  | DFTATFGPLDSL NTR  |
|                      |                     |                   |          |                  |    |           | ko     | 2            | 21/26 | 4.468  | AEAEQAEELSFPR     |
|                      |                     |                   |          |                  |    |           | wt     | 2            | 13/22 | 2.192  | SPVDSVLEGVK       |
|                      |                     |                   |          |                  |    |           | wt     | 1            | 14/26 | 2.775  | AEAEQAEELSFPR     |
|                      |                     |                   |          |                  |    |           | wt     | 2            | 14/16 | 2.518  | ALAVSDLNR         |
|                      |                     |                   |          |                  |    |           | wt     | 2            | 14/22 | 2.22   | SSSAPVASPNVR      |
|                      |                     |                   |          |                  |    |           | wt     | 2            | 14/16 | 2.585  | ALAVSDLNR         |
|                      |                     |                   |          |                  |    |           | wt     | 2            | 11/16 | 2.565  | HYFIEVNSR         |
|                      |                     |                   |          |                  |    |           | wt     | 2            | 15/22 | 2.594  | SSSAPVASPNVR      |
|                      |                     |                   |          |                  |    |           | wt     | 2            | 17/22 | 2.762  | GTPLDTEVPLER      |
|                      |                     |                   |          |                  |    |           | wt     | 2            | 14/16 | 2.222  | HYFIEVNSR         |

| protein name                   | Swiss-Prot acc. no. | protein mass (Da) | data set | matched peptides |    | slice no. | sample | charge state | ions  | Xcorr  | assigned sequence  |
|--------------------------------|---------------------|-------------------|----------|------------------|----|-----------|--------|--------------|-------|--------|--------------------|
|                                |                     |                   |          | ko               | wt |           |        |              |       |        |                    |
|                                |                     |                   |          |                  |    |           | wt     | 2            | 15/16 | 3.33   | ADEAYLIGR          |
|                                |                     |                   |          |                  |    |           | wt     | 2            | 15/16 | 3.317  | ADEAYLIGR          |
|                                |                     |                   |          |                  |    |           | wt     | 2            | 19/24 | 4.075  | ADFAQACQDAGVR      |
|                                |                     |                   |          |                  |    |           | wt     | 2            | 17/26 | 3.696  | AEAEAQEELSFPFR     |
|                                |                     |                   |          |                  |    |           | wt     | 2            | 18/22 | 2.781  | GTPLDTEVPLER       |
|                                |                     |                   |          |                  |    |           | wt     | 2            | 18/28 | 3.336  | DFTATFGPLDSLNTNR   |
|                                |                     |                   |          |                  |    |           | wt     | 2            | 20/28 | 4.368  | DFTATFGPLDSLNTNR   |
|                                |                     |                   |          |                  |    |           | wt     | 2            | 21/26 | 3.718  | AEAEAQEELSFPFR     |
| Pyruvate kinase isozymes M1/M2 | P52480              | 57,845            | A        | 2                | 8  | 2         | ko     | 2            | 19/24 | 3.7415 | NTGHICTIGPASR      |
|                                |                     |                   |          |                  |    |           | ko     | 2            | 19/24 | 3.7415 | NTGHICTIGPASR      |
|                                |                     |                   |          |                  |    |           | wt     | 2            | 10/16 | 1.9551 | GDYPLEAVR          |
|                                |                     |                   |          |                  |    |           | wt     | 2            | 10/16 | 1.9551 | GDYPLEAVR          |
|                                |                     |                   |          |                  |    |           | wt     | 2            | 16/20 | 3.5239 | LDIDSAPITAR        |
|                                |                     |                   |          |                  |    |           | wt     | 2            | 16/20 | 3.5239 | LDIDSAPITAR        |
|                                |                     |                   |          |                  |    |           | wt     | 2            | 23/34 | 4.4042 | GADFLVTEVENGGSLGSK |
|                                |                     |                   |          |                  |    |           | wt     | 2            | 23/34 | 4.4042 | GADFLVTEVENGGSLGSK |
|                                |                     |                   |          |                  |    |           | wt     | 2            | 19/24 | 4.1784 | NTGHICTIGPASR      |
|                                |                     |                   |          |                  |    |           | wt     | 2            | 19/24 | 4.1784 | NTGHICTIGPASR      |
|                                |                     |                   | B        | 1                | 4  | 2         | ko     | 2            | 25/34 | 4.888  | GADFLVTEVENGGSLGSK |
|                                |                     |                   |          |                  |    |           | wt     | 2            | 13/16 | 2.599  | GDYPLEAVR          |
|                                |                     |                   |          |                  |    |           | wt     | 2            | 18/24 | 3.397  | IYVDDGLISLQVK      |
|                                |                     |                   |          |                  |    |           | wt     | 2            | 20/32 | 2.923  | GVNLPGAAVDLPAVSEK  |
|                                |                     |                   |          |                  |    |           | wt     | 2            | 25/34 | 4.726  | GADFLVTEVENGGSLGSK |
|                                |                     |                   | C        | 3                | 6  | 2         | ko     | 2            | 16/20 | 2.811  | GDLGIEIPA EK       |
|                                |                     |                   |          |                  |    |           | ko     | 2            | 14/16 | 2.616  | GDYPLEAVR          |
|                                |                     |                   |          |                  |    |           | ko     | 2            | 20/32 | 3.998  | GVNLPGAAVDLPAVSEK  |
|                                |                     |                   |          |                  |    |           | wt     | 2            | 20/32 | 4.079  | GVNLPGAAVDLPAVSEK  |
|                                |                     |                   |          |                  |    |           | wt     | 2            | 13/14 | 2.628  | APIHAVTR           |
|                                |                     |                   |          |                  |    |           | wt     | 2            | 19/34 | 3.933  | GADFLVTEVENGGSLGSK |
|                                |                     |                   |          |                  |    |           | wt     | 2            | 19/24 | 3.732  | NTGHICTIGPASR      |
|                                |                     |                   |          |                  |    |           | wt     | 2            | 15/18 | 3.009  | ITLDNAYMEK         |
|                                |                     |                   |          |                  |    |           | wt     | 2            | 20/34 | 3.486  | GADFLVTEVENGGSLGSK |
| RNA-binding protein FUS        | P56959              | 52,673            | B        | 1                | 1  | 2         | ko     | 2            | 19/26 | 2.681  | GEATVSFDDPPSAK     |
|                                |                     |                   |          |                  |    |           | wt     | 2            | 19/26 | 3.085  | GEATVSFDDPPSAK     |
| Septin 3                       | Q9Z1S5              | 40,038            | C        | 1                | 1  | 4         | ko     | 2            | 11/16 | 2.346  | ADTMTLEEK          |
|                                |                     |                   |          |                  |    |           | wt     | 2            | 12/16 | 2.453  | STLVNTLFK          |
| Septin-11                      | Q8C1B7              | 49,695            | A        | 2                | 2  | 4         | ko     | 2            | 15/18 | 2.9347 | SYELQESNVR         |
|                                |                     |                   |          |                  |    |           | ko     | 2            | 16/20 | 2.2835 | STLM*DTLFNTK       |
|                                |                     |                   |          |                  |    |           | wt     | 2            | 11/16 | 2.4827 | VNIPIAK            |
|                                |                     |                   |          |                  |    |           | wt     | 2            | 15/18 | 2.9148 | SYELQESNVR         |
|                                |                     |                   | B        | 2                | 1  | 3         | ko     | 2            | 15/22 | 2.526  | TIISYIDEQFER       |
|                                |                     |                   |          |                  |    |           | ko     | 2            | 12/20 | 2.474  | ELEEEVSNFQK        |
|                                |                     |                   |          |                  |    |           | wt     | 2            | 16/20 | 2.843  | ELEEEVSNFQK        |
|                                |                     |                   | C        | 1                | 1  | 3         | ko     | 2            | 14/16 | 2.357  | VNNFPPLPK          |

| protein name                                 | Swiss-Prot acc. no. | protein mass (Da) | data set | matched peptides |    | slice no. | sample | charge state | ions  | Xcorr  | assigned sequence    |   |   |    |   |       |       |            |
|----------------------------------------------|---------------------|-------------------|----------|------------------|----|-----------|--------|--------------|-------|--------|----------------------|---|---|----|---|-------|-------|------------|
|                                              |                     |                   |          | ko               | wt |           |        |              |       |        |                      |   |   |    |   |       |       |            |
|                                              |                     |                   |          |                  |    |           | wt     | 2            | 15/20 | 3.562  | ELEEEVSNFQK          |   |   |    |   |       |       |            |
| Signal recognition particle 19 kDa protein   | Q9D7A6              | 16,191            | C        | 1                | 2  | 7         | ko     | 2            | 17/20 | 3.365  | ALSQLAEVEEK          |   |   |    |   |       |       |            |
|                                              |                     |                   |          |                  |    |           | wt     | 2            | 15/28 | 2.469  | SGGADPSLQQEGGSK      |   |   |    |   |       |       |            |
|                                              |                     |                   |          |                  |    |           | wt     | 2            | 20/28 | 3.661  | SGGADPSLQQEGGSK      |   |   |    |   |       |       |            |
| Sodium/potassium-transporting ATPase alpha-1 | Q8VDN2              | 112,982           | A        | 8                | 17 | 1         | ko     | 2            | 18/36 | 3.126  | QGAIVAVTGDGVNDSPALK  |   |   |    |   |       |       |            |
|                                              |                     |                   |          |                  |    |           | ko     | 2            | 14/20 | 2.367  | LNIPVQVNPR           |   |   |    |   |       |       |            |
|                                              |                     |                   |          |                  |    |           | ko     | 2            | 13/16 | 2.1066 | GIVVYTGDR            |   |   |    |   |       |       |            |
|                                              |                     |                   |          |                  |    |           | ko     | 2            | 39436 | 2.0983 | NM*VPQQALVIR         |   |   |    |   |       |       |            |
|                                              |                     |                   |          |                  |    |           | ko     | 2            | 17/28 | 2.7441 | VDNSSLTGESEPPQTR     |   |   |    |   |       |       |            |
|                                              |                     |                   |          |                  |    |           | ko     | 2            | 17/24 | 3.6451 | SPDFTNENPLETR        |   |   |    |   |       |       |            |
|                                              |                     |                   |          |                  |    |           | ko     | 2            | 25/34 | 5.2473 | GVGIHSEGNETVEDIAAR   |   |   |    |   |       |       |            |
|                                              |                     |                   |          |                  |    |           | ko     | 3            | 26/76 | 3.0212 | QGAIVAVTGDGVNDSPALKK |   |   |    |   |       |       |            |
|                                              |                     |                   |          |                  |    |           | wt     | 2            | 10/16 | 1.9882 | GIVVYTGDR            |   |   |    |   |       |       |            |
|                                              |                     |                   |          |                  |    |           | wt     | 2            | 16/20 | 2.4641 | NM*VPQQALVIR         |   |   |    |   |       |       |            |
|                                              |                     |                   |          |                  |    |           | wt     | 2            | 17/20 | 2.6458 | LNIPVQVNPR           |   |   |    |   |       |       |            |
|                                              |                     |                   |          |                  |    |           | wt     | 2            | 21/28 | 3.6507 | VDNSSLTGESEPPQTR     |   |   |    |   |       |       |            |
|                                              |                     |                   |          |                  |    |           | wt     | 2            | 18/24 | 3.7059 | SPDFTNENPLETR        |   |   |    |   |       |       |            |
|                                              |                     |                   |          |                  |    |           | wt     | 2            | 18/34 | 3.4201 | GVGIHSEGNETVEDIAAR   |   |   |    |   |       |       |            |
|                                              |                     |                   |          |                  |    |           | wt     | 2            | 14/28 | 2.5238 | VDNSSLTGESEPPQTR     |   |   |    |   |       |       |            |
|                                              |                     |                   |          |                  |    |           | wt     | 2            | 18/28 | 3.448  | AVFQANQENLPILKR      |   |   |    |   |       |       |            |
|                                              |                     |                   |          |                  |    |           | wt     | 2            | 24/34 | 4.6395 | GVGIHSEGNETVEDIAAR   |   |   |    |   |       |       |            |
|                                              |                     |                   |          |                  |    |           | wt     | 2            | 22/36 | 3.6632 | QGAIVAVTGDGVNDSPALK  |   |   |    |   |       |       |            |
|                                              |                     |                   |          |                  |    |           | wt     | 2            | 21/30 | 3.9961 | ADIGVAM*GIVGSDVSK    |   |   |    |   |       |       |            |
|                                              |                     |                   |          |                  |    |           | wt     | 2            | 25/34 | 5.4003 | GVGIHSEGNETVEDIAAR   |   |   |    |   |       |       |            |
|                                              |                     |                   |          |                  |    |           | wt     | 2            | 16/24 | 3.5296 | SPDFTNENPLETR        |   |   |    |   |       |       |            |
|                                              |                     |                   |          |                  |    |           | wt     | 2            | 24/36 | 4.96   | QGAIVAVTGDGVNDSPALK  |   |   |    |   |       |       |            |
|                                              |                     |                   |          |                  |    |           | wt     | 2            | 23/34 | 4.6915 | GVGIHSEGNETVEDIAAR   |   |   |    |   |       |       |            |
|                                              |                     |                   |          |                  |    |           | wt     | 3            | 25/64 | 3.3948 | IM*ESFKNM*VPQQALVIR  |   |   |    |   |       |       |            |
|                                              |                     |                   |          |                  |    |           | wt     | 2            | 16/30 | 2.2659 | ADIGVAM*GIAGSDVSK    |   |   |    |   |       |       |            |
|                                              |                     |                   |          |                  |    |           |        |              |       | C      | 3                    | 4 | 1 | ko | 2 | 15/18 | 2.674 | TSATWFALSR |
|                                              |                     |                   |          |                  |    |           |        |              |       |        |                      |   |   | ko | 2 | 16/20 | 2.553 | LNIPVQVNPR |
|                                              |                     |                   |          |                  |    |           | ko     | 3            | 24/56 | 2.946  | DKYEPAAVSEHGDKK      |   |   |    |   |       |       |            |
|                                              |                     |                   |          |                  |    |           | wt     | 2            | 14/18 | 2.115  | TSATWFALSR           |   |   |    |   |       |       |            |
|                                              |                     |                   |          |                  |    |           | wt     | 2            | 15/18 | 3.092  | TSATWFALSR           |   |   |    |   |       |       |            |
|                                              |                     |                   |          |                  |    |           | wt     | 2            | 14/20 | 2.648  | LNIPVQVNPR           |   |   |    |   |       |       |            |
|                                              |                     |                   |          |                  |    |           | wt     | 2            | 16/20 | 3.121  | LNIPVQVNPR           |   |   |    |   |       |       |            |
| Sodium/potassium-transporting ATPase alpha-2 | Q6PIE5              | 112,217           | A        | 4                | 0  | 1         | wt     | 2            | 14/20 | 2.233  | LNIPVQVNPR           |   |   |    |   |       |       |            |
|                                              |                     |                   |          |                  |    |           | wt     | 2            | 14/20 | 2.8992 | LNIPVQVNPR           |   |   |    |   |       |       |            |
|                                              |                     |                   |          |                  |    |           | wt     | 2            | 21/24 | 3.1833 | DTAGDASESALLK        |   |   |    |   |       |       |            |
|                                              |                     |                   |          |                  |    |           | wt     | 2            | 17/24 | 2.8563 | SPEFTHENPLETR        |   |   |    |   |       |       |            |
|                                              |                     |                   |          |                  |    |           | ko     | 2            | 14/16 | 2.428  | GIVVYTGDR            |   |   |    |   |       |       |            |
|                                              |                     |                   |          |                  |    |           | ko     | 2            | 14/20 | 2.318  | LNIPVQVNPR           |   |   |    |   |       |       |            |
|                                              |                     |                   |          |                  |    |           | ko     | 2            | 21/28 | 4.035  | VDNSSLTGESEPPQTR     |   |   |    |   |       |       |            |
|                                              |                     |                   |          |                  |    |           | ko     | 2            | 20/24 | 3.256  | AVAGDASESALLK        |   |   |    |   |       |       |            |
|                                              |                     |                   |          |                  |    |           | ko     | 2            | 19/24 | 3.446  | SPDFTNENPLETR        |   |   |    |   |       |       |            |

| protein name                                 | Swiss-Prot acc. no. | protein mass (Da) | data set | matched peptides |    | slice no. | sample | charge state | ions  | Xcorr  | assigned sequence  |
|----------------------------------------------|---------------------|-------------------|----------|------------------|----|-----------|--------|--------------|-------|--------|--------------------|
|                                              |                     |                   |          | ko               | wt |           |        |              |       |        |                    |
|                                              |                     |                   |          |                  |    |           | wt     | 2            | 22/28 | 3.897  | VDNSSLTGESEPPQTR   |
|                                              |                     |                   |          |                  |    |           | wt     | 2            | 13/16 | 2.209  | GIVVYTGDR          |
|                                              |                     |                   |          |                  |    |           | wt     | 2            | 16/26 | 2.684  | AVFQANQENLPILK     |
|                                              |                     |                   |          |                  |    |           | wt     | 2            | 19/24 | 2.942  | AVAGDASESALLK      |
|                                              |                     |                   |          |                  |    |           | wt     | 2            | 17/24 | 3.908  | SPDFTNENPLETR      |
|                                              |                     |                   |          |                  |    |           | wt     | 2            | 19/28 | 3.637  | VDNSSLTGESEPPQTR   |
|                                              |                     |                   |          |                  |    |           | wt     | 2            | 18/24 | 3.751  | SPDFTNENPLETR      |
|                                              |                     |                   |          |                  |    |           | wt     | 2            | 21/34 | 4.063  | GVGIISEGNETVEDIAAR |
|                                              |                     |                   |          |                  |    |           | wt     | 2            | 26/34 | 4.996  | GVGIISEGNETVEDIAAR |
|                                              |                     |                   |          |                  |    |           | wt     | 2            | 16/18 | 3.092  | TSATWFALSR         |
| Sodium/potassium-transporting ATPase alpha-3 | Q6PIC6              | 111,692           | A        | 4                | 7  | 1         | ko     | 2            | 20/24 | 3.9868 | DVAGDASESALLK      |
|                                              |                     |                   |          |                  |    |           | ko     | 2            | 24/30 | 4.8551 | ADIGVAM*GIAGSDVSK  |
|                                              |                     |                   |          |                  |    |           | ko     | 2            | 13/22 | 2.0735 | IATLASGLEVGK       |
|                                              |                     |                   |          |                  |    |           | ko     | 2            | 22/24 | 4.3393 | DVAGDASESALLK      |
|                                              |                     |                   |          |                  |    |           | wt     | 2            | 20/28 | 3.2183 | AVFKGGQDNIPVLKR    |
|                                              |                     |                   |          |                  |    |           | wt     | 2            | 18/22 | 3.1739 | IATLASGLEVGK       |
|                                              |                     |                   |          |                  |    |           | wt     | 2            | 21/24 | 4.3137 | DVAGDASESALLK      |
|                                              |                     |                   |          |                  |    |           | wt     | 2            | 21/24 | 3.9721 | DVAGDASESALLK      |
|                                              |                     |                   |          |                  |    |           | wt     | 2            | 16/30 | 2.2659 | ADIGVAM*GIAGSDVSK  |
|                                              |                     |                   |          |                  |    |           | wt     | 2            | 18/22 | 3.0323 | IATLASGLEVGK       |
|                                              |                     |                   |          |                  |    |           | wt     | 2            | 20/28 | 3.2183 | AVFKGGQDNIPVLKR    |
| Sodium/potassium-transporting ATPase beta-2  | P14231              | 33,344            | B        | 1                | 0  | 4         | ko     | 2            | 24/34 | 4.147  | GVGIISEGNETVEDIAAR |
|                                              |                     |                   | C        | 3                | 2  | 4         | ko     | 2            | 18/20 | 3.621  | AYGENIGYSEK        |
|                                              |                     |                   |          |                  |    |           | ko     | 2            | 15/24 | 2.332  | YNPNVLPVQCTGK      |
|                                              |                     |                   |          |                  |    |           | ko     | 2            | 19/26 | 2.36   | VAPPGLTQIPQIQK     |
|                                              |                     |                   |          |                  |    |           | wt     | 2            | 19/22 | 3.444  | TIAMDGTEGLVR       |
|                                              |                     |                   |          |                  |    |           | wt     | 2            | 17/24 | 2.278  | YNPNVLPVQCTGK      |
| Spectrin alpha chain                         | Q3URW8              | 97,906            | A        | 18               | 43 | 1         | ko     | 2            | 15/22 | 2.2285 | GVIDM*GNSLIER      |
|                                              |                     |                   |          |                  |    |           | ko     | 2            | 15/20 | 2.321  | WTQLLANSATR        |
|                                              |                     |                   |          |                  |    |           | ko     | 2            | 15/16 | 2.0028 | DLTGVQNLNR         |
|                                              |                     |                   |          |                  |    |           | ko     | 2            | 14/22 | 2.197  | GVIDM*GNSLIER      |
|                                              |                     |                   |          |                  |    |           | ko     | 2            | 14/22 | 2.7512 | DVDEIEAWISEK       |
|                                              |                     |                   |          |                  |    |           | ko     | 2            | 13/16 | 2.985  | SLQQLAEER          |
|                                              |                     |                   |          |                  |    |           | ko     | 2            | 16/28 | 3.0783 | LSDDNTIGQEEIQQR    |
|                                              |                     |                   |          |                  |    |           | ko     | 2            | 16/18 | 2.7469 | SSEEIESAFR         |
|                                              |                     |                   |          |                  |    |           | ko     | 2            | 17/20 | 3.3418 | DLSSVQTLTK         |
|                                              |                     |                   |          |                  |    |           | ko     | 2            | 11/18 | 2.0581 | LLVSSDYGR          |
|                                              |                     |                   |          |                  |    |           | ko     | 2            | 17/22 | 3.6582 | LGESQTLQQFSR       |
|                                              |                     |                   |          |                  |    |           | ko     | 2            | 19/26 | 3.6159 | LAALADQWQFLVQK     |
|                                              |                     |                   |          |                  |    |           | ko     | 2            | 15/18 | 2.6074 | SSEEIESAFR         |
|                                              |                     |                   |          |                  |    |           | ko     | 2            | 18/20 | 3.9248 | KVEDLFLTFK         |
|                                              |                     |                   |          |                  |    |           | ko     | 2            | 17/20 | 3.2684 | DVTGAEALLER        |
|                                              |                     |                   |          |                  |    |           | ko     | 2            | 16/22 | 3.9518 | LGESQTLQQFSR       |
|                                              |                     |                   |          |                  |    |           | ko     | 2            | 16/24 | 3.9312 | ENLLEEQGSIALR      |
|                                              |                     |                   |          |                  |    |           | ko     | 3            | 27/68 | 4.6257 | DLAALGDKVNSLGETAQR |
|                                              |                     |                   |          |                  |    |           | wt     | 1            | 5/8   | 1.2098 | SLFVN              |

| protein name | Swiss-Prot<br>acc. no. | protein<br>mass<br>(Da) | data<br>set | matched<br>peptides |    | slice<br>no. | sample | charge<br>state | ions  | Xcorr  | assigned sequence     |
|--------------|------------------------|-------------------------|-------------|---------------------|----|--------------|--------|-----------------|-------|--------|-----------------------|
|              |                        |                         |             | ko                  | wt |              |        |                 |       |        |                       |
|              |                        |                         |             |                     |    |              | wt     | 2               | 14/16 | 2.6797 | DLTGVQNLR             |
|              |                        |                         |             |                     |    |              | wt     | 2               | 10/16 | 1.8054 | LLEAQSHFR             |
|              |                        |                         |             |                     |    |              | wt     | 2               | 10/10 | 1.4686 | FLSDFR                |
|              |                        |                         |             |                     |    |              | wt     | 2               | 12/16 | 2.5176 | SLOQLAEER             |
|              |                        |                         |             |                     |    |              | wt     | 2               | 10/16 | 2.0386 | GLVSSDELAK            |
|              |                        |                         |             |                     |    |              | wt     | 2               | 11/20 | 1.896  | KVEDLFLTFAK           |
|              |                        |                         |             |                     |    |              | wt     | 2               | 12/16 | 2.4075 | EELYQNLTR             |
|              |                        |                         |             |                     |    |              | wt     | 2               | 13/18 | 2.4053 | VEDLFLTFAK            |
|              |                        |                         |             |                     |    |              | wt     | 2               | 17/20 | 3.1172 | DVTGAEALLER           |
|              |                        |                         |             |                     |    |              | wt     | 2               | 20/28 | 4.1323 | LSDDNTIGQEEIQQR       |
|              |                        |                         |             |                     |    |              | wt     | 2               | 11/24 | 1.7879 | ELPTAFDYVEFTR         |
|              |                        |                         |             |                     |    |              | wt     | 2               | 17/20 | 3.1617 | WTQLLANSATR           |
|              |                        |                         |             |                     |    |              | wt     | 2               | 15/20 | 2.9424 | WTQLLANSATR           |
|              |                        |                         |             |                     |    |              | wt     | 2               | 13/18 | 2.3595 | LLVSSDYGR             |
|              |                        |                         |             |                     |    |              | wt     | 2               | 14/16 | 2.4723 | DLTGVQNLR             |
|              |                        |                         |             |                     |    |              | wt     | 2               | 16/18 | 3.2466 | SSEEIESAFR            |
|              |                        |                         |             |                     |    |              | wt     | 2               | 12/16 | 2.2428 | EELYQNLTR             |
|              |                        |                         |             |                     |    |              | wt     | 2               | 16/22 | 2.9225 | SLLGSAHEVQR           |
|              |                        |                         |             |                     |    |              | wt     | 2               | 17/22 | 3.0152 | DVDEIEAWISEK          |
|              |                        |                         |             |                     |    |              | wt     | 2               | 20/24 | 3.892  | ENLLEEQGSIALR         |
|              |                        |                         |             |                     |    |              | wt     | 2               | 21/28 | 4.1995 | LSDDNTIGQEEIQQR       |
|              |                        |                         |             |                     |    |              | wt     | 2               | 16/22 | 2.8645 | GVIDM*GNSLIER         |
|              |                        |                         |             |                     |    |              | wt     | 2               | 21/34 | 4.409  | SSLSSAQADFNQLAELDR    |
|              |                        |                         |             |                     |    |              | wt     | 2               | 17/20 | 3.029  | DLSSVQTLTK            |
|              |                        |                         |             |                     |    |              | wt     | 2               | 18/20 | 3.4622 | DVTGAEALLER           |
|              |                        |                         |             |                     |    |              | wt     | 2               | 18/20 | 4.2942 | KVEDLFLTFAK           |
|              |                        |                         |             |                     |    |              | wt     | 2               | 19/22 | 4.1663 | LGESQTLQQFSR          |
|              |                        |                         |             |                     |    |              | wt     | 2               | 16/22 | 3.4896 | SLLGSAHEVQR           |
|              |                        |                         |             |                     |    |              | wt     | 2               | 16/18 | 3.3094 | SSEEIESAFR            |
|              |                        |                         |             |                     |    |              | wt     | 2               | 17/22 | 4.321  | LGESQTLQQFSR          |
|              |                        |                         |             |                     |    |              | wt     | 2               | 21/26 | 4.2872 | LAALADQWQFLVQK        |
|              |                        |                         |             |                     |    |              | wt     | 2               | 13/24 | 2.0682 | ELPTAFDYVEFTR         |
|              |                        |                         |             |                     |    |              | wt     | 2               | 27/34 | 5.41   | SSLSSAQADFNQLAELDR    |
|              |                        |                         |             |                     |    |              | wt     | 3               | 17/32 | 2.1288 | RQEENDKLR             |
|              |                        |                         |             |                     |    |              | wt     | 3               | 22/44 | 3.555  | M*QHINLEQQIQAR        |
|              |                        |                         |             |                     |    |              | wt     | 3               | 19/52 | 2.2745 | HQLEADISAHEDR         |
|              |                        |                         |             |                     |    |              | wt     | 3               | 23/72 | 2.4834 | LLVSSDYGRDLTGVQNLR    |
|              |                        |                         |             |                     |    |              | wt     | 3               | 32/80 | 2.8097 | EAALTNEEVGADLEQVEVLQK |
|              |                        |                         |             |                     |    |              | wt     | 3               | 30/80 | 2.4839 | NQALNTDNYGHDLASVQALQR |
|              |                        |                         |             |                     |    |              | wt     | 3               | 33/56 | 4.1482 | GRELPTAFDYVEFTR       |
|              |                        |                         |             |                     |    |              | wt     | 3               | 30/80 | 3.5836 | NQALNTDNYGHDLASVQALQR |
|              |                        |                         |             |                     |    |              | wt     | 3               | 30/56 | 3.1955 | GRELPTAFDYVEFTR       |
|              |                        |                         |             |                     |    |              | wt     | 3               | 34/68 | 5.0206 | DLAALGDKVNSLGETAQR    |
|              |                        |                         |             |                     |    |              | wt     | 3               | 34/68 | 4.8697 | DLAALGDKVNSLGETAQR    |
|              |                        |                         | B           | 1                   | 16 | 1            | ko     | 2               | 17/20 | 2.924  | DLSSVQTLTK            |
|              |                        |                         |             |                     |    |              | wt     | 2               | 13/20 | 2.475  | KLLVSSDYGR            |
|              |                        |                         |             |                     |    |              | wt     | 2               | 13/20 | 2.434  | DLSSVQTLTK            |
|              |                        |                         |             |                     |    |              | wt     | 2               | 20/24 | 3.838  | VNDVCTNGQDLIK         |

| protein name        | Swiss-Prot<br>acc. no. | protein<br>mass<br>(Da) | data<br>set | matched<br>peptides |    | slice<br>no. | sample | charge<br>state | ions  | Xcorr  | assigned sequence   |
|---------------------|------------------------|-------------------------|-------------|---------------------|----|--------------|--------|-----------------|-------|--------|---------------------|
|                     |                        |                         |             | ko                  | wt |              |        |                 |       |        |                     |
|                     |                        |                         |             |                     |    |              | wt     | 2               | 15/20 | 2.849  | DLSSVQTLTK          |
|                     |                        |                         |             |                     |    |              | wt     | 2               | 17/20 | 3.142  | ADVVESWIGEK         |
|                     |                        |                         |             |                     |    |              | wt     | 2               | 17/20 | 2.706  | DLSSVQTLTK          |
|                     |                        |                         |             |                     |    |              | wt     | 2               | 25/34 | 4.881  | SSLSSAQADFNQLAELDR  |
|                     |                        |                         |             |                     |    |              | wt     | 2               | 16/18 | 2.787  | LLVSSEDYGR          |
|                     |                        |                         |             |                     |    |              | wt     | 2               | 17/20 | 3.216  | DLSSVQTLTK          |
|                     |                        |                         |             |                     |    |              | wt     | 2               | 16/20 | 2.99   | KVEDLFLTFAK         |
|                     |                        |                         |             |                     |    |              | wt     | 2               | 16/22 | 2.847  | LGESQTLQQFSR        |
|                     |                        |                         |             |                     |    |              | wt     | 2               | 16/18 | 2.45   | VEDLFLTFAK          |
|                     |                        |                         |             |                     |    |              | wt     | 2               | 14/18 | 2.033  | GLVSSDELAKE         |
|                     |                        |                         |             |                     |    |              | wt     | 2               | 19/24 | 3.41   | CTELNQAWTSLGK       |
|                     |                        |                         |             |                     |    |              | wt     | 2               | 17/20 | 2.612  | LNIPVQVNPR          |
|                     |                        |                         |             |                     |    |              | wt     | 2               | 13/18 | 2.166  | DLDYATLLK           |
| Spectrin beta chain | Q62261                 | 274,223                 | A           | 16                  | 37 | 1            | ko     | 2               | 8/10  | 1.7446 | FREFAR              |
|                     |                        |                         |             |                     |    |              | ko     | 2               | 15/18 | 3.0842 | DQNTVETLQR          |
|                     |                        |                         |             |                     |    |              | ko     | 2               | 8/16  | 1.8583 | DTGNIGQER           |
|                     |                        |                         |             |                     |    |              | ko     | 2               | 13/16 | 2.1407 | VQAVVAVAR           |
|                     |                        |                         |             |                     |    |              | ko     | 2               | 12/10 | 1.9004 | EIGQSVDEVEK         |
|                     |                        |                         |             |                     |    |              | ko     | 2               | 8/16  | 1.6607 | ENEVLEAWK           |
|                     |                        |                         |             |                     |    |              | ko     | 2               | 7/14  | 1.5124 | QLQEDAAR            |
|                     |                        |                         |             |                     |    |              | ko     | 2               | 13/18 | 2.2823 | VLDNAIETEK          |
|                     |                        |                         |             |                     |    |              | ko     | 2               | 14/16 | 2.3061 | LLEVLSGER           |
|                     |                        |                         |             |                     |    |              | ko     | 2               | 13/16 | 2.2175 | VAVVNQIAR           |
|                     |                        |                         |             |                     |    |              | ko     | 2               | 11/18 | 2.459  | VLLSQDYGK           |
|                     |                        |                         |             |                     |    |              | ko     | 2               | 16/28 | 2.2402 | TLETAAQM*EGFLNR     |
|                     |                        |                         |             |                     |    |              | ko     | 2               | 21/32 | 3.3763 | SQNIITDSSSLNAEAIR   |
|                     |                        |                         |             |                     |    |              | ko     | 2               | 15/20 | 2.2581 | LVS DGNINSDR        |
|                     |                        |                         |             |                     |    |              | ko     | 2               | 22/26 | 3.6266 | SALPAQSAATLPAR      |
|                     |                        |                         |             |                     |    |              | ko     | 3               | 22/60 | 2.2802 | LQAAYAGDKADDIQKR    |
|                     |                        |                         |             |                     |    |              | wt     | 2               | 9/16  | 1.6284 | ENEVLEAWK           |
|                     |                        |                         |             |                     |    |              | wt     | 2               | 8/16  | 1.7093 | ETWLSNQER           |
|                     |                        |                         |             |                     |    |              | wt     | 2               | 12/18 | 2.3932 | ELALRNELIR          |
|                     |                        |                         |             |                     |    |              | wt     | 2               | 8/12  | 1.5906 | LPEELGR             |
|                     |                        |                         |             |                     |    |              | wt     | 2               | 13/20 | 2.1581 | FM*ELLEPLSER        |
|                     |                        |                         |             |                     |    |              | wt     | 2               | 12/16 | 1.9684 | SLLDACEGR           |
|                     |                        |                         |             |                     |    |              | wt     | 2               | 10/10 | 1.8844 | FREFAR              |
|                     |                        |                         |             |                     |    |              | wt     | 2               | 15/18 | 2.8985 | VLLSQDYGK           |
|                     |                        |                         |             |                     |    |              | wt     | 2               | 16/18 | 3.6429 | DQNTVETLQR          |
|                     |                        |                         |             |                     |    |              | wt     | 2               | 11/16 | 1.8009 | EAASELLM*R          |
|                     |                        |                         |             |                     |    |              | wt     | 2               | 12/14 | 2.4923 | SAATWDER            |
|                     |                        |                         |             |                     |    |              | wt     | 2               | 12/20 | 2.4674 | QALQDTLALYK         |
|                     |                        |                         |             |                     |    |              | wt     | 2               | 13/16 | 2.6012 | DTGNIGQER           |
|                     |                        |                         |             |                     |    |              | wt     | 2               | 10/12 | 2.0539 | LAGIEER             |
|                     |                        |                         |             |                     |    |              | wt     | 2               | 13/20 | 2.0102 | EIGQSVDEVEK         |
|                     |                        |                         |             |                     |    |              | wt     | 2               | 15/16 | 3.118  | LLEVLSGER           |
|                     |                        |                         |             |                     |    |              | wt     | 2               | 17/36 | 3.1322 | LVSQDNFGFDLPAVEAATK |
|                     |                        |                         |             |                     |    |              | wt     | 2               | 16/18 | 3.0496 | LTLELLEVR           |

| protein name | Swiss-Prot<br>acc. no. | protein<br>mass<br>(Da) | data<br>set | matched<br>peptides |    | slice<br>no. | sample | charge<br>state | ions  | Xcorr  | assigned sequence     |
|--------------|------------------------|-------------------------|-------------|---------------------|----|--------------|--------|-----------------|-------|--------|-----------------------|
|              |                        |                         |             | ko                  | wt |              |        |                 |       |        |                       |
|              |                        |                         |             |                     |    |              | wt     | 2               | 13/20 | 2.3319 | HLLGVEDLLQK           |
|              |                        |                         |             |                     |    |              | wt     | 2               | 13/16 | 2.7399 | VAVVNQIAR             |
|              |                        |                         |             |                     |    |              | wt     | 2               | 14/22 | 2.8062 | LSDGNEYLFQAK          |
|              |                        |                         |             |                     |    |              | wt     | 2               | 16/20 | 3.5634 | DLDFQSWLSR            |
|              |                        |                         |             |                     |    |              | wt     | 2               | 11/18 | 2.5784 | VLDNAIETEK            |
|              |                        |                         |             |                     |    |              | wt     | 2               | 16/20 | 3.3717 | DLM*LWM*EDVIR         |
|              |                        |                         |             |                     |    |              | wt     | 2               | 19/24 | 4.1971 | EQWANLEQLSAIR         |
|              |                        |                         |             |                     |    |              | wt     | 2               | 21/26 | 3.7409 | SALPAQSAATLPAR        |
|              |                        |                         |             |                     |    |              | wt     | 2               | 26/32 | 5.9811 | SQNIITDSSSLNAEAIR     |
|              |                        |                         |             |                     |    |              | wt     | 2               | 17/20 | 3.1737 | LVSDGNINSDR           |
|              |                        |                         |             |                     |    |              | wt     | 2               | 23/28 | 3.9276 | TLETAAQM*EGFLNR       |
|              |                        |                         |             |                     |    |              | wt     | 3               | 22/72 | 2.9701 | DASVAEAWLLGQEPYLSR    |
|              |                        |                         |             |                     |    |              | wt     | 3               | 19/56 | 2.3199 | KHEAIETDIAAYEER       |
|              |                        |                         |             |                     |    |              | wt     | 3               | 20/72 | 2.3141 | EAEKLESEHPDQAQAILSR   |
|              |                        |                         |             |                     |    |              | wt     | 3               | 19/44 | 2.5879 | TQILAASYELHK          |
|              |                        |                         |             |                     |    |              | wt     | 3               | 25/64 | 3.186  | M*HTTFEHDIQALGTQVR    |
|              |                        |                         |             |                     |    |              | wt     | 3               | 25/76 | 3.1145 | VIESTQDLGNDLAGVM*ALQR |
|              |                        |                         |             |                     |    |              | wt     | 3               | 20/76 | 2.4686 | AQTLPTSVVITSESSPGKR   |
|              |                        |                         |             |                     |    |              | wt     | 3               | 26/64 | 3.7389 | LPEELGRDQNTVETLQR     |
|              |                        |                         | B           | 4                   | 13 | 1            | ko     | 2               | 17/18 | 3.028  | LTLELLEVR             |
|              |                        |                         |             |                     |    |              | ko     | 2               | 12/16 | 2.576  | ITDLYTDLR             |
|              |                        |                         |             |                     |    |              | ko     | 2               | 18/20 | 2.364  | LVSDGNINSDR           |
|              |                        |                         |             |                     |    |              | ko     | 2               | 17/20 | 2.559  | HLLGVEDLLQK           |
|              |                        |                         |             |                     |    |              | wt     | 2               | 19/22 | 3.76   | LGESQTLQQFSR          |
|              |                        |                         |             |                     |    |              | wt     | 2               | 14/16 | 2.897  | LLEVLSGER             |
|              |                        |                         |             |                     |    |              | wt     | 2               | 16/18 | 2.865  | LTLELLEVR             |
|              |                        |                         |             |                     |    |              | wt     | 2               | 15/16 | 2.713  | ITDLYTDLR             |
|              |                        |                         |             |                     |    |              | wt     | 2               | 15/16 | 2.769  | LLEVLSGER             |
|              |                        |                         |             |                     |    |              | wt     | 2               | 15/16 | 3.093  | LLEVLSGER             |
|              |                        |                         |             |                     |    |              | wt     | 2               | 13/18 | 2.527  | VLDNAIETEK            |
|              |                        |                         |             |                     |    |              | wt     | 2               | 15/18 | 2.68   | DQNTVETLQR            |
|              |                        |                         |             |                     |    |              | wt     | 2               | 13/16 | 2.125  | VAVVNQIAR             |
|              |                        |                         |             |                     |    |              | wt     | 2               | 19/26 | 2.924  | FQIQDISVETEDNK        |
|              |                        |                         |             |                     |    |              | wt     | 2               | 15/16 | 3.208  | ITDLYTDLR             |
|              |                        |                         |             |                     |    |              | wt     | 2               | 15/20 | 2.447  | HLLGVEDLLQK           |
|              |                        |                         |             |                     |    |              | wt     | 3               | 29/52 | 4.445  | HQAFEAEELHANADR       |
|              |                        |                         | C           | 8                   | 10 | 1            | ko     | 2               | 16/20 | 2.996  | DLSSVQTLTK            |
|              |                        |                         |             |                     |    |              | ko     | 2               | 18/20 | 3.383  | DVTGAEALLER           |
|              |                        |                         |             |                     |    |              | ko     | 2               | 17/20 | 2.905  | DVTGAEALLER           |
|              |                        |                         |             |                     |    |              | ko     | 2               | 14/22 | 2.372  | GVIDMGNSLIER          |
|              |                        |                         |             |                     |    |              | ko     | 2               | 17/22 | 3.735  | LGESQTLQQFSR          |
|              |                        |                         |             |                     |    |              | ko     | 2               | 16/18 | 2.954  | DQNTVETLQR            |
|              |                        |                         |             |                     |    |              | ko     | 2               | 19/20 | 3.106  | LVSDGNINSDR           |
|              |                        |                         |             |                     |    |              | ko     | 2               | 16/18 | 3.172  | VLDNAIETEK            |
|              |                        |                         |             |                     |    |              | wt     | 2               | 15/18 | 2.337  | LLVSSEDYGR            |
|              |                        |                         |             |                     |    |              | wt     | 2               | 16/20 | 2.918  | DLSSVQTLTK            |
|              |                        |                         |             |                     |    |              | wt     | 2               | 17/20 | 3.748  | DLSSVQTLTK            |
|              |                        |                         |             |                     |    |              | wt     | 2               | 15/18 | 2.138  | GLVSSDELAK            |

| protein name    | Swiss-Prot acc. no. | protein mass (Da) | data set | matched peptides |    | slice no. | sample | charge state | ions  | Xcorr  | assigned sequence   |
|-----------------|---------------------|-------------------|----------|------------------|----|-----------|--------|--------------|-------|--------|---------------------|
|                 |                     |                   |          | ko               | wt |           |        |              |       |        |                     |
|                 |                     |                   |          |                  |    |           | wt     | 2            | 18/28 | 2.651  | LSDDNTIGQEEIQQR     |
|                 |                     |                   |          |                  |    |           | wt     | 2            | 18/20 | 2.699  | WTQLANSATR          |
|                 |                     |                   |          |                  |    |           | wt     | 2            | 18/20 | 2.989  | DVTGAEALLER         |
|                 |                     |                   |          |                  |    |           | wt     | 2            | 18/22 | 3.659  | LGESQTLQQFSR        |
|                 |                     |                   |          |                  |    |           | wt     | 2            | 17/18 | 3.364  | DQNTVETLQR          |
|                 |                     |                   |          |                  |    |           | wt     | 2            | 19/20 | 3.381  | LVSDGNNSDR          |
| Synapsin-1      | O88935              | 74,097            | A        | 1                | 1  | 2         | ko     | 2            | 15/22 | 2.9796 | TYATAEPFIDAK        |
|                 |                     |                   |          | 0                | 1  | 3         | wt     | 2            | 16/22 | 2.9085 | TYATAEPFIDAK        |
|                 |                     |                   |          |                  |    |           | wt     | 2            | 18/22 | 3.7652 | TYATAEPFIDAK        |
|                 |                     |                   | B        | 2                | 2  | 2         | ko     | 2            | 16/22 | 2.25   | TYATAEPFIDAK        |
|                 |                     |                   |          |                  |    |           | ko     | 2            | 15/22 | 2.856  | TYATAEPFIDAK        |
|                 |                     |                   |          |                  |    |           | wt     | 2            | 16/22 | 2.656  | TYATAEPFIDAK        |
|                 |                     |                   |          |                  |    |           | wt     | 2            | 18/22 | 2.472  | TYATAEPFIDAK        |
|                 |                     |                   | C        | 3                | 4  | 2         | ko     | 1            | 9/14  | 1.516  | SFASLFSD            |
|                 |                     |                   |          | 3                | 5  | 3         | ko     | 2            | 12/24 | 2.112  | EMLSSTYPVVVK        |
|                 |                     |                   |          |                  |    |           | ko     | 2            | 17/22 | 3.311  | TYATAEPFIDAK        |
|                 |                     |                   |          |                  |    |           | ko     | 2            | 18/22 | 3.079  | TYATAEPFIDAK        |
|                 |                     |                   |          |                  |    |           | ko     | 2            | 16/22 | 2.999  | TYATAEPFIDAK        |
|                 |                     |                   |          |                  |    |           | ko     | 2            | 17/22 | 3.723  | TYATAEPFIDAK        |
|                 |                     |                   |          |                  |    |           | wt     | 1            | 11/22 | 1.772  | TYATAEPFIDAK        |
|                 |                     |                   |          |                  |    |           | wt     | 2            | 11/12 | 2.149  | MTQALPR             |
|                 |                     |                   |          |                  |    |           | wt     | 2            | 11/12 | 2.016  | MTQALPR             |
|                 |                     |                   |          |                  |    |           | wt     | 2            | 16/22 | 3.024  | TYATAEPFIDAK        |
|                 |                     |                   |          |                  |    |           | wt     | 2            | 15/22 | 2.685  | TYATAEPFIDAK        |
|                 |                     |                   |          |                  |    |           | wt     | 2            | 16/22 | 2.93   | TYATAEPFIDAK        |
|                 |                     |                   |          |                  |    |           | wt     | 2            | 18/24 | 3.34   | EMLSSTYPVVVK        |
|                 |                     |                   |          |                  |    |           | wt     | 2            | 18/22 | 3.418  | TYATAEPFIDAK        |
|                 |                     |                   |          |                  |    |           | wt     | 2            | 16/22 | 3.341  | TYATAEPFIDAK        |
| Synapsin-2      | Q64332              | 63,373            | C        | 2                | 1  | 4         | ko     | 2            | 22/30 | 4.488  | GSHSQQSSPGALTLGR    |
|                 |                     |                   |          |                  |    |           | ko     | 2            | 24/36 | 5.149  | QTAASAGLVDAPAPSAASR |
|                 |                     |                   |          |                  |    |           | wt     | 2            | 27/36 | 4.973  | QTAASAGLVDAPAPSAASR |
| Synaptobrevin 2 | P63044              | 12,691            | B        | 1                | 4  | 6         | ko     | 2            | 19/32 | 3.736  | ADALQAGASQFETSAAK   |
|                 |                     |                   |          |                  |    |           | wt     | 2            | 25/32 | 4.551  | ADALQAGASQFETSAAK   |
|                 |                     |                   |          |                  |    |           | wt     | 2            | 23/32 | 4.019  | ADALQAGASQFETSAAK   |
|                 |                     |                   |          |                  |    |           | wt     | 2            | 22/32 | 4.225  | ADALQAGASQFETSAAK   |
|                 |                     |                   |          |                  |    |           | wt     | 3            | 22/64 | 2.995  | ADALQAGASQFETSAAK   |
|                 |                     |                   | C        | 2                | 1  | 7         | ko     | 2            | 21/32 | 5.067  | ADALQAGASQFETSAAK   |
|                 |                     |                   |          |                  |    |           | ko     | 3            | 31/64 | 4.785  | ADALQAGASQFETSAAK   |
|                 |                     |                   |          |                  |    |           | wt     | 2            | 24/32 | 4.938  | ADALQAGASQFETSAAK   |
| Synaptogyrin-3  | Q8R191              | 24,561            | A        | 1                | 2  | 5         | ko     | 2            | 16/22 | 2.8712 | AGAAFDPVSFAR        |
|                 |                     |                   |          |                  |    |           | wt     | 1            | 7/12  | 1.2603 | GYQVPAY             |
|                 |                     |                   |          |                  |    |           | wt     | 2            | 15/22 | 2.5058 | AGAAFDPVSFAR        |
|                 |                     |                   | B        | 1                | 1  | 5         | ko     | 2            | 17/22 | 3.246  | AGAAFDPVSFAR        |
|                 |                     |                   |          |                  |    |           | wt     | 2            | 17/22 | 3      | AGAAFDPVSFAR        |



| protein name                                | Swiss-Prot acc. no. | protein mass (Da) | data set | matched peptides |    | slice no. | sample | charge state | ions  | Xcorr  | assigned sequence |
|---------------------------------------------|---------------------|-------------------|----------|------------------|----|-----------|--------|--------------|-------|--------|-------------------|
|                                             |                     |                   |          | ko               | wt |           |        |              |       |        |                   |
| Syntaxin-binding protein 1                  | O08599              | 67,569            | B        | 2                | 4  | 2         | ko     | 2            | 18/24 | 2.334  | SSASFSTTAVSAR     |
|                                             |                     |                   |          |                  |    |           | ko     | 2            | 15/18 | 2.671  | NGITEENLNK        |
|                                             |                     |                   |          |                  |    |           | wt     | 2            | 16/18 | 3.742  | ISEQTYQLSR        |
|                                             |                     |                   |          |                  |    |           | wt     | 2            | 16/20 | 2.377  | HIAEVSQEVTR       |
|                                             |                     |                   |          |                  |    |           | wt     | 2            | 15/24 | 2.404  | LAEQIATLCATLK     |
|                                             |                     |                   |          |                  |    |           | wt     | 2            | 19/24 | 2.25   | SSASFSTTAVSAR     |
| T-complex protein 1 subunit alpha A         | P11984              | 60,341            | A        | 1                | 1  | 3         | ko     | 2            | 12/18 | 2.0931 | EQLAIAEFAR        |
|                                             |                     |                   |          |                  |    |           | wt     | 2            | 11/18 | 2.5156 | EQLAIAEFAR        |
| T-complex protein 1 subunit beta            | P80314              | 57,477            | B        | 1                | 1  | 3         | ko     | 2            | 17/22 | 3.53   | GATQQILDEAER      |
|                                             |                     |                   |          |                  |    |           | wt     | 2            | 17/22 | 3.297  | GATQQILDEAER      |
| T-complex protein 1 subunit delta           | Q3TH0               | 58,084            | A        | 0                | 2  | 3         | wt     | 2            | 23/30 | 3.5078 | ALIAGGGAPEIELALR  |
|                                             |                     |                   |          |                  |    |           | wt     | 2            | 23/30 | 3.5078 | ALIAGGGAPEIELALR  |
|                                             |                     |                   | B        | 1                | 1  | 3         | ko     | 2            | 17/24 | 2.716  | VIDPATATSVDLR     |
|                                             |                     |                   |          |                  |    |           | wt     | 2            | 16/24 | 2.761  | VIDPATATSVDLR     |
| T-complex protein 1 subunit gamma; Matricin | P80318              | 60,630            | A        | 2                | 2  | 3         | ko     | 2            | 16/20 | 3.1875 | AVAQALEVIPR       |
|                                             |                     |                   | A        |                  |    |           | ko     | 2            | 18/20 | 3.5709 | TAVETAVLLLR       |
|                                             |                     |                   | A        |                  |    |           | wt     | 2            | 13/20 | 2.362  | IVLLDSSLEYK       |
|                                             |                     |                   | A        |                  |    |           | wt     | 2            | 14/20 | 2.7166 | AVAQALEVIPR       |
| T-complex protein 1 subunit theta           | P42932              | 59,555            | A        | 5                | 0  | 3         | ko     | 2            | 13/18 | 2.2412 | DVDEVSSLLR        |
|                                             |                     |                   |          |                  |    |           | ko     | 2            | 17/18 | 3.0753 | FAEAFEAIPIR       |
|                                             |                     |                   |          |                  |    |           | ko     | 2            | 17/22 | 2.9259 | LFVTNDAATILR      |
|                                             |                     |                   |          |                  |    |           | ko     | 2            | 17/26 | 1.9555 | LVPGGGATEIELAK    |
|                                             |                     |                   |          |                  |    |           | ko     | 2            | 21/28 | 3.7141 | AIAGTGANVIVTGGK   |
|                                             |                     |                   | B        | 2                | 1  | 4         | ko     | 2            | 13/20 | 2.605  | LATNAAVTVLR       |
|                                             |                     |                   |          |                  |    |           | ko     | 2            | 16/28 | 2.945  | AIAGTGANVIVTGGK   |
|                                             |                     |                   |          |                  |    |           | wt     | 2            | 13/22 | 2.364  | LFVTNDAATILR      |
|                                             |                     |                   | C        | 1                | 2  | 3         | ko     | 2            | 16/22 | 2.528  | GIDPFSLDALAK      |
|                                             |                     |                   |          |                  |    |           | wt     | 2            | 15/18 | 3.076  | FAEAFEAIPIR       |
|                                             |                     |                   |          |                  |    |           | wt     | 2            | 14/18 | 3.437  | DVDEVSSLLR        |
| Tetraspan TM4SF; Tspan-2                    | Q922J6              | 24,181            | C        | 1                | 1  | 1         | ko     | 2            | 13/22 | 2.473  | ESSEQVQPTCPK      |
|                                             |                     |                   |          |                  |    |           | wt     | 2            | 14/22 | 3.503  | ESSEQVQPTCPK      |
| Transitional endoplasmic reticulum ATPase   | Q01853              | 89,322            | A        | 3                | 1  | 1         | ko     | 2            | 11/22 | 1.9688 | GVLFGPPGCGK       |
|                                             |                     |                   |          |                  |    |           | ko     | 2            | 39432 | 2.0566 | DVDLEFLAK         |
|                                             |                     |                   |          |                  |    |           | ko     | 2            | 18/22 | 2.992  | GILLYGPPGTGK      |
|                                             |                     |                   |          |                  |    |           | wt     | 2            | 17/22 | 3.0965 | GILLYGPPGTGK      |
| Triosephosphate isomerase                   | P17751              | 26,713            | B        | 1                | 2  | 5         | ko     | 2            | 18/22 | 2.951  | SNVNDGVAQSTR      |
|                                             |                     |                   |          |                  |    |           | wt     | 2            | 12/24 | 2.965  | TATPQQAQEVHEK     |
|                                             |                     |                   |          |                  |    |           | wt     | 2            | 17/22 | 2.749  | SNVNDGVAQSTR      |
| Triosephosphate isomerase                   |                     |                   | C        | 2                | 2  | 4         | ko     | 2            | 14/24 | 2.928  | TATPQQAQEVHEK     |

| protein name              | Swiss-Prot<br>acc. no. | protein<br>mass<br>(Da) | data<br>set | matched<br>peptides |    | slice<br>no. | sample | charge<br>state | ions  | Xcorr  | assigned sequence    |
|---------------------------|------------------------|-------------------------|-------------|---------------------|----|--------------|--------|-----------------|-------|--------|----------------------|
|                           |                        |                         |             | ko                  | wt |              |        |                 |       |        |                      |
|                           |                        |                         |             |                     |    |              | ko     | 2               | 19/24 | 3.894  | IYGGSVTGATCK         |
|                           |                        |                         |             |                     |    |              | wt     | 2               | 12/20 | 2.054  | LVVVGGGVGVK          |
|                           |                        |                         |             |                     |    |              | wt     | 2               | 15/24 | 3.172  | TATPQQAQEVHEK        |
| Tropomyosin alpha-1 chain | P58771                 | 32,681                  | A           | 1                   | 0  | 3            | ko     | 2               | 12/18 | 2.4441 | IQLVEEELDR           |
|                           |                        |                         |             | 5                   | 2  | 4            | ko     | 2               | 14/26 | 2.8698 | IQLVEEELDRAQER       |
|                           |                        |                         |             |                     |    |              | ko     | 2               | 15/30 | 2.9805 | AISEELDHALNDM*TSI    |
|                           |                        |                         |             |                     |    |              | ko     | 2               | 17/18 | 2.8333 | IQLVEEELDR           |
|                           |                        |                         |             |                     |    |              | ko     | 3               | 28/56 | 3.3811 | RIQLVEEELDRAQER      |
|                           |                        |                         |             |                     |    |              | wt     | 2               | 17/18 | 3.2632 | IQLVEEELDR           |
|                           |                        |                         |             |                     |    |              | wt     | 3               | 24/56 | 3.0186 | RIQLVEEELDRAQER      |
| Tropomyosin-3             | P21107                 | 32,863                  | A           | 1                   | 1  | 6            | ko     | 2               | 19/24 | 4.0921 | TIDDLEDELYAQK        |
|                           |                        |                         |             |                     |    |              | wt     | 2               | 15/24 | 2.8846 | AADAAEAVASLNR        |
|                           |                        |                         | B           | 0                   | 3  | 6            | wt     | 2               | 20/24 | 4.351  | LEEAEKAADESER        |
|                           |                        |                         |             |                     |    |              | wt     | 3               | 24/48 | 3.656  | LEEAEKAADESER        |
|                           |                        |                         |             |                     |    |              | wt     | 3               | 23/76 | 4.415  | LATALQKLEEAKEKADESER |
| Tubulin alpha-1A chain    | P68362                 | 50,136                  | B           | 10                  | 11 | 2            | ko     | 2               | 15/18 | 2.787  | DVNAAIATIK           |
|                           |                        |                         |             |                     |    |              | ko     | 2               | 16/18 | 2.894  | DVNAAIATIK           |
|                           |                        |                         |             |                     |    |              | ko     | 2               | 15/18 | 2.881  | DVNAAIATIK           |
|                           |                        |                         |             |                     |    |              | ko     | 2               | 16/18 | 3.009  | DVNAAIATIK           |
|                           |                        |                         |             |                     |    |              | ko     | 2               | 12/18 | 2.28   | DVNAAIATIK           |
|                           |                        |                         |             |                     |    |              | ko     | 2               | 12/28 | 2.189  | AVFVDLEPTVIDEVR      |
|                           |                        |                         |             |                     |    |              | ko     | 2               | 18/34 | 2.392  | VGINYQPPTVVPGDLAK    |
|                           |                        |                         |             |                     |    |              | ko     | 2               | 16/18 | 3.094  | DVNAAIATIK           |
|                           |                        |                         |             |                     |    |              | ko     | 2               | 17/34 | 2.65   | VGINYQPPTVVPGDLAK    |
|                           |                        |                         |             |                     |    |              | ko     | 2               | 22/38 | 5.027  | TIGGGDSSFNTFFSETGAGK |
|                           |                        |                         |             |                     |    |              | wt     | 2               | 17/18 | 2.627  | DVNAIAAIK            |
|                           |                        |                         |             |                     |    |              | wt     | 2               | 16/18 | 2.633  | DVNAIAAIK            |
|                           |                        |                         |             |                     |    |              | wt     | 2               | 17/18 | 2.763  | DVNAIAAIK            |
|                           |                        |                         |             |                     |    |              | wt     | 2               | 15/18 | 2.879  | DVNAAIATIK           |
|                           |                        |                         |             |                     |    |              | wt     | 2               | 17/18 | 2.785  | DVNAAIATIK           |
|                           |                        |                         |             |                     |    |              | wt     | 2               | 15/18 | 3.06   | DVNAAIATIK           |
|                           |                        |                         |             |                     |    |              | wt     | 2               | 16/18 | 3.286  | DVNAAIATIK           |
|                           |                        |                         |             |                     |    |              | wt     | 2               | 14/18 | 2.747  | DVNAAIATIK           |
|                           |                        |                         |             |                     |    |              | wt     | 2               | 15/18 | 2.757  | DVNAAIATIK           |
|                           |                        |                         |             |                     |    |              | wt     | 2               | 16/18 | 3.279  | DVNAAIATIK           |
|                           |                        |                         |             |                     |    |              | wt     | 2               | 18/34 | 2.803  | VGINYQPPTVVPGDLAK    |
|                           |                        |                         | C           | 22                  | 33 | 3            | ko     | 1               | 11/18 | 2.135  | DVNAIAAIK            |
|                           |                        |                         |             |                     |    |              | ko     | 1               | 11/18 | 1.731  | DVNAAIATIK           |
|                           |                        |                         |             |                     |    |              | ko     | 1               | 11/18 | 1.778  | DVNAAIATIK           |
|                           |                        |                         |             |                     |    |              | ko     | 1               | 11/18 | 1.806  | DVNAAIATIK           |
|                           |                        |                         |             |                     |    |              | ko     | 1               | 12/18 | 2.538  | DVNAAIATIK           |
|                           |                        |                         |             |                     |    |              | ko     | 2               | 15/34 | 2.054  | VGINYQPPTVVPGDLAK    |
|                           |                        |                         |             |                     |    |              | ko     | 2               | 17/18 | 2.922  | DVNAIAAIK            |
|                           |                        |                         |             |                     |    |              | ko     | 2               | 12/18 | 2.186  | DVNAAIATIK           |
|                           |                        |                         |             |                     |    |              | ko     | 2               | 15/18 | 3.121  | DVNAAIATIK           |

| protein name   | Swiss-Prot<br>acc. no. | protein<br>mass<br>(Da) | data<br>set | matched<br>peptides |    | slice<br>no. | sample | charge<br>state | ions  | Xcorr  | assigned sequence   |
|----------------|------------------------|-------------------------|-------------|---------------------|----|--------------|--------|-----------------|-------|--------|---------------------|
|                |                        |                         |             | ko                  | wt |              |        |                 |       |        |                     |
|                |                        |                         |             |                     |    |              | ko     | 2               | 16/18 | 3.049  | DVNAAIAAIK          |
|                |                        |                         |             |                     |    |              | ko     | 2               | 13/14 | 2.395  | PTYTNLNR            |
|                |                        |                         |             |                     |    |              | ko     | 2               | 16/18 | 3.128  | DVNAAIATIK          |
|                |                        |                         |             |                     |    |              | ko     | 2               | 11/14 | 2.206  | PTYTNLNR            |
|                |                        |                         |             |                     |    |              | ko     | 2               | 14/18 | 2.957  | DVNAAIATIK          |
|                |                        |                         |             |                     |    |              | ko     | 2               | 13/18 | 2.618  | DVNAAIATIK          |
|                |                        |                         |             |                     |    |              | ko     | 2               | 16/18 | 3.159  | DVNAAIATIK          |
|                |                        |                         |             |                     |    |              | ko     | 2               | 16/18 | 3.107  | DVNAAIATIK          |
|                |                        |                         |             |                     |    |              | ko     | 2               | 16/18 | 3.437  | DVNAAIATIK          |
|                |                        |                         |             |                     |    |              | ko     | 2               | 16/18 | 3.104  | DVNAAIATIK          |
|                |                        |                         |             |                     |    |              | ko     | 2               | 16/18 | 3.336  | DVNAAIATIK          |
|                |                        |                         |             |                     |    |              | ko     | 2               | 14/34 | 2.647  | VGINYQPPTVVPGGDLAK  |
|                |                        |                         |             |                     |    |              | ko     | 3               | 19/56 | 2.613  | AVFVDLEPTVIDEVR     |
|                |                        |                         |             |                     |    |              | wt     | 1               | 12/18 | 2.373  | DVNAAIAAIK          |
|                |                        |                         |             |                     |    |              | wt     | 1               | 7/12  | 1.503  | LSVDYGK             |
|                |                        |                         |             |                     |    |              | wt     | 1               | 11/18 | 1.656  | DVNAAIATIK          |
|                |                        |                         |             |                     |    |              | wt     | 1               | 11/18 | 2.125  | DVNAAIATIK          |
|                |                        |                         |             |                     |    |              | wt     | 1               | 12/18 | 1.648  | DVNAAIATIK          |
|                |                        |                         |             |                     |    |              | wt     | 1               | 11/18 | 2.058  | DVNAAIAAIK          |
|                |                        |                         |             |                     |    |              | wt     | 1               | 12/18 | 2.055  | DVNAAIATIK          |
|                |                        |                         |             |                     |    |              | wt     | 1               | 14/18 | 1.996  | DVNAAIATIK          |
|                |                        |                         |             |                     |    |              | wt     | 1               | 12/18 | 2.141  | DVNAAIATIK          |
|                |                        |                         |             |                     |    |              | wt     | 2               | 14/18 | 2.479  | DVNAAIAAIK          |
|                |                        |                         |             |                     |    |              | wt     | 2               | 13/16 | 2.477  | EIIDPVLDR           |
|                |                        |                         |             |                     |    |              | wt     | 2               | 15/18 | 2.505  | DVNAAIATIK          |
|                |                        |                         |             |                     |    |              | wt     | 2               | 16/18 | 3.039  | DVNAAIAAIK          |
|                |                        |                         |             |                     |    |              | wt     | 2               | 11/14 | 2.318  | PTYTNLNR            |
|                |                        |                         |             |                     |    |              | wt     | 2               | 16/18 | 3.01   | DVNAAIATIK          |
|                |                        |                         |             |                     |    |              | wt     | 2               | 16/18 | 3.179  | DVNAAIAAIK          |
|                |                        |                         |             |                     |    |              | wt     | 2               | 16/18 | 3.224  | DVNAAIAAIK          |
|                |                        |                         |             |                     |    |              | wt     | 2               | 16/18 | 3.653  | DVNAAIAAIK          |
|                |                        |                         |             |                     |    |              | wt     | 2               | 17/18 | 3.351  | DVNAAIAAIK          |
|                |                        |                         |             |                     |    |              | wt     | 2               | 16/38 | 2.005  | TIGGGDSFNFFFSETGAGK |
|                |                        |                         |             |                     |    |              | wt     | 2               | 16/18 | 3.504  | DVNAAIATIK          |
|                |                        |                         |             |                     |    |              | wt     | 2               | 16/18 | 2.696  | DVNAAIAAIK          |
|                |                        |                         |             |                     |    |              | wt     | 2               | 16/18 | 3.172  | DVNAAIATIK          |
|                |                        |                         |             |                     |    |              | wt     | 2               | 17/18 | 3.308  | DVNAAIATIK          |
|                |                        |                         |             |                     |    |              | wt     | 2               | 16/18 | 2.968  | DVNAAIATIK          |
|                |                        |                         |             |                     |    |              | wt     | 2               | 15/34 | 2.314  | VGINYQPPTVVPGGDLAK  |
|                |                        |                         |             |                     |    |              | wt     | 2               | 16/18 | 3.006  | DVNAAIATIK          |
|                |                        |                         |             |                     |    |              | wt     | 2               | 15/34 | 2.704  | VGINYQPPTVVPGGDLAK  |
|                |                        |                         |             |                     |    |              | wt     | 2               | 18/34 | 3.457  | VGINYQPPTVVPGGDLAK  |
|                |                        |                         |             |                     |    |              | wt     | 2               | 20/34 | 3.041  | VGINYQPPTVVPGGDLAK  |
|                |                        |                         |             |                     |    |              | wt     | 2               | 15/38 | 3.268  | TIGGGDSFNFFFSETGAGK |
|                |                        |                         |             |                     |    |              | wt     | 2               | 20/34 | 3.268  | VGINYQPPTVVPGGDLAK  |
| Tubulin beta 1 | Q80ZV2                 | 21,454                  | A           | 15                  | 32 | 4            | ko     | 2               | 12/38 | 2.387  | TIGGGDSFNFFFSETGAGK |
|                |                        |                         |             |                     |    |              | ko     | 2               | 15/26 | 2.8395 | NLDIERPTYTNLNR      |

| protein name          | Swiss-Prot<br>acc. no. | protein<br>mass<br>(Da) | data<br>set | matched<br>peptides |    | slice<br>no. | sample | charge<br>state | ions  | Xcorr  | assigned sequence     |
|-----------------------|------------------------|-------------------------|-------------|---------------------|----|--------------|--------|-----------------|-------|--------|-----------------------|
|                       |                        |                         |             | ko                  | wt |              |        |                 |       |        |                       |
|                       |                        |                         |             |                     |    |              | ko     | 2               | 14/24 | 2.4897 | TIQFVDWCPTGFK         |
|                       |                        |                         |             |                     |    |              | ko     | 2               | 12/16 | 2.105  | EIIDLVLDR             |
|                       |                        |                         |             |                     |    |              | ko     | 2               | 18/28 | 3.2759 | AVFVDEPTVIDEVR        |
|                       |                        |                         |             |                     |    |              | ko     | 2               | 12/16 | 2.1616 | EIIDLVLDR             |
|                       |                        |                         |             |                     |    |              | ko     | 2               | 13/16 | 2.1089 | EIIDLVLDR             |
|                       |                        |                         |             |                     |    |              | ko     | 2               | 15/18 | 3.388  | DVNAAIATIK            |
|                       |                        |                         |             |                     |    |              | ko     | 2               | 18/30 | 3.3521 | IHFPLATYAPVISAEK      |
|                       |                        |                         |             |                     |    |              | ko     | 2               | 22/28 | 4.8433 | AVFVDEPTVIDEVR        |
|                       |                        |                         |             |                     |    |              | ko     | 2               | 19/34 | 3.393  | VGINYQPPTVVPGDLAK     |
|                       |                        |                         |             |                     |    |              | ko     | 2               | 20/28 | 4.0869 | AVFVDEPTVIDEVR        |
|                       |                        |                         |             |                     |    |              | ko     | 2               | 20/38 | 3.6376 | TIGGGDSSFNTFFSETGAGK  |
|                       |                        |                         |             |                     |    |              | ko     | 2               | 22/32 | 4.26   | AVCM*LSNTTAIAEAWAR    |
|                       |                        |                         |             |                     |    |              | ko     | 3               | 23/56 | 3.237  | AVFVDEPTVIDEVR        |
|                       |                        |                         |             |                     |    |              | wt     | 2               | 11/14 | 2.0673 | LSVDYGKK              |
|                       |                        |                         |             |                     |    |              | wt     | 2               | 10/30 | 1.8348 | IHFPLATYAPVISAEK      |
|                       |                        |                         |             |                     |    |              | wt     | 2               | 11/20 | 2.0673 | LSVDYGKK              |
|                       |                        |                         |             |                     |    |              | wt     | 2               | 9/12  | 1.6622 | FDLM*YAK              |
|                       |                        |                         |             |                     |    |              | wt     | 2               | 15/16 | 2.9669 | EIIDLVLDR             |
|                       |                        |                         |             |                     |    |              | wt     | 2               | 15/26 | 2.8325 | NLDIERPTYTNLNR        |
|                       |                        |                         |             |                     |    |              | wt     | 2               | 16/34 | 2.7893 | VGINYQPPTVVPGDLAK     |
|                       |                        |                         |             |                     |    |              | wt     | 2               | 15/18 | 2.5065 | DVNAAIATIK            |
|                       |                        |                         |             |                     |    |              | wt     | 2               | 16/28 | 2.9232 | AVFVDEPTVIDEVR        |
|                       |                        |                         |             |                     |    |              | wt     | 2               | 13/18 | 2.2407 | DVNAAIATIK            |
|                       |                        |                         |             |                     |    |              | wt     | 2               | 18/34 | 2.6652 | VGINYQPPTVVPGDLAK     |
|                       |                        |                         |             |                     |    |              | wt     | 2               | 21/28 | 4.205  | AVFVDEPTVIDEVR        |
|                       |                        |                         |             |                     |    |              | wt     | 2               | 15/34 | 2.5749 | VGINYQPPTVVPGDLAK     |
|                       |                        |                         |             |                     |    |              | wt     | 2               | 15/18 | 2.8072 | DVNAAIATIK            |
|                       |                        |                         |             |                     |    |              | wt     | 2               | 12/16 | 2.6196 | EIIDLVLDR             |
|                       |                        |                         |             |                     |    |              | wt     | 2               | 18/28 | 3.2887 | AVFVDEPTVIDEVR        |
|                       |                        |                         |             |                     |    |              | wt     | 2               | 15/16 | 2.8187 | EIIDLVLDR             |
|                       |                        |                         |             |                     |    |              | wt     | 2               | 15/18 | 3.0306 | DVNAAIATIK            |
|                       |                        |                         |             |                     |    |              | wt     | 2               | 16/18 | 2.5734 | DVNAAIATIK            |
|                       |                        |                         |             |                     |    |              | wt     | 2               | 21/28 | 4.1293 | AVFVDEPTVIDEVR        |
|                       |                        |                         |             |                     |    |              | wt     | 2               | 18/24 | 3.1688 | TIQFVDWCPTGFK         |
|                       |                        |                         |             |                     |    |              | wt     | 2               | 17/18 | 3.9988 | DVNAAIATIK            |
|                       |                        |                         |             |                     |    |              | wt     | 2               | 17/38 | 3.4816 | TIGGGDSSFNTFFSETGAGK  |
|                       |                        |                         |             |                     |    |              | wt     | 2               | 21/34 | 3.5442 | VGINYQPPTVVPGDLAK     |
|                       |                        |                         |             |                     |    |              | wt     | 2               | 19/38 | 3.8348 | TIGGGDSSFNTFFSETGAGK  |
|                       |                        |                         |             |                     |    |              | wt     | 2               | 15/22 | 2.1822 | QLFHPEQLITGK          |
|                       |                        |                         |             |                     |    |              | wt     | 2               | 24/32 | 5.2467 | AVCM*LSNTTAIAEAWAR    |
|                       |                        |                         |             |                     |    |              | wt     | 2               | 22/38 | 4.754  | TIGGGDSSFNTFFSETGAGK  |
|                       |                        |                         |             |                     |    |              | wt     | 3               | 27/60 | 3.4395 | IHFPLATYAPVISAEK      |
|                       |                        |                         |             |                     |    |              | wt     | 3               | 29/80 | 3.9176 | QLFHPEQLITGKEDAANNYAR |
|                       |                        |                         |             |                     |    |              | wt     | 3               | 27/60 | 3.8346 | GDVVPKDVNAAIATIK      |
| Tubulin beta-2A chain | Q99J49                 | 34,001                  | C           | 1                   | 2  | 2            | ko     | 2               | 13/16 | 2.06   | YLTVATVFR             |
|                       |                        |                         |             |                     |    |              | wt     | 2               | 14/16 | 2.324  | YLTVATVFR             |
|                       |                        |                         |             |                     |    |              | wt     | 2               | 14/16 | 2.351  | YLTVATVFR             |

| protein name         | Swiss-Prot acc. no. | protein mass (Da) | data set | matched peptides |    | slice no. | sample               | charge state | ions   | Xcorr  | assigned sequence |    |   |    |   |       |        |            |
|----------------------|---------------------|-------------------|----------|------------------|----|-----------|----------------------|--------------|--------|--------|-------------------|----|---|----|---|-------|--------|------------|
|                      |                     |                   |          | ko               | wt |           |                      |              |        |        |                   |    |   |    |   |       |        |            |
| Tubulin beta-3 chain | Q9ERD7              | 50,419            | A        | 0                | 1  | 1         | ko                   | 2            | 14/20  | 2.1141 | KLAVNM*VPFPR      |    |   |    |   |       |        |            |
|                      |                     |                   |          |                  |    |           | ko                   | 2            | 13/16  | 2.2097 | YLTVATVFR         |    |   |    |   |       |        |            |
|                      |                     |                   |          |                  |    |           | ko                   | 2            | 20/28  | 3.4975 | ALTVPELTQQM*FDAQ  |    |   |    |   |       |        |            |
|                      |                     |                   |          |                  |    |           | ko                   | 2            | 18/26  | 3.3407 | NSSYFVEWIPNNVK    |    |   |    |   |       |        |            |
|                      |                     |                   |          |                  |    |           | ko                   | 2            | 16/18  | 3.2406 | LAVNM*VPFPR       |    |   |    |   |       |        |            |
|                      |                     |                   |          |                  |    |           | ko                   | 2            | 16/18  | 3.0089 | LAVNMVPFPR        |    |   |    |   |       |        |            |
|                      |                     |                   |          |                  |    |           | ko                   | 2            | 21/28  | 3.9593 | AILVDLEPGTM*DSVR  |    |   |    |   |       |        |            |
|                      |                     |                   |          |                  |    |           | wt                   | 2            | 14/28  | 3.1871 | AILVDLEPGTMDSVR   |    |   |    |   |       |        |            |
|                      |                     |                   |          |                  |    |           | wt                   | 2            | 16/20  | 2.5093 | FPGQLNADLRK       |    |   |    |   |       |        |            |
|                      |                     |                   |          |                  |    |           | wt                   | 2            | 14/26  | 2.53   | NSSYFVEWIPNNVK    |    |   |    |   |       |        |            |
|                      |                     |                   |          |                  |    |           | wt                   | 2            | 18/28  | 2.9169 | ALTVPELTQQM*FDAQ  |    |   |    |   |       |        |            |
|                      |                     |                   |          |                  |    |           | wt                   | 2            | 12/20  | 2.3568 | KLAVNM*VPFPR      |    |   |    |   |       |        |            |
|                      |                     |                   |          |                  |    |           | wt                   | 2            | 14/28  | 2.6584 | ALTVPELTQQM*FDAQ  |    |   |    |   |       |        |            |
|                      |                     |                   |          |                  |    |           | wt                   | 2            | 14/16  | 2.98   | VAVCDIPPR         |    |   |    |   |       |        |            |
|                      |                     |                   |          |                  |    |           | wt                   | 2            | 15/18  | 2.8445 | FPGQLNADLR        |    |   |    |   |       |        |            |
|                      |                     |                   |          |                  |    |           | wt                   | 2            | 20/28  | 3.3845 | ALTVPELTQQM*FDAQ  |    |   |    |   |       |        |            |
|                      |                     |                   |          |                  |    |           | wt                   | 2            | 16/18  | 3.2323 | LAVNM*VPFPR       |    |   |    |   |       |        |            |
|                      |                     |                   |          |                  |    |           | wt                   | 2            | 14/16  | 3.1715 | YLTVATVFR         |    |   |    |   |       |        |            |
|                      |                     |                   |          |                  |    |           | wt                   | 2            | 13/18  | 2.8337 | LAVNM*VPFPR       |    |   |    |   |       |        |            |
|                      |                     |                   |          |                  |    |           | wt                   | 2            | 15/26  | 3.0388 | NSSYFVEWIPNNVK    |    |   |    |   |       |        |            |
|                      |                     |                   |          |                  |    |           | wt                   | 2            | 20/26  | 4.1605 | NSSYFVEWIPNNVK    |    |   |    |   |       |        |            |
|                      |                     |                   |          |                  |    |           | wt                   | 2            | 15/18  | 3.3951 | LAVNMVPFPR        |    |   |    |   |       |        |            |
|                      |                     |                   |          |                  |    |           | wt                   | 2            | 20/28  | 4.139  | AILVDLEPGTM*DSVR  |    |   |    |   |       |        |            |
|                      |                     |                   |          |                  |    |           | wt                   | 2            | 15/18  | 2.9675 | LAVNM*VPFPR       |    |   |    |   |       |        |            |
|                      |                     |                   |          |                  |    |           | wt                   | 2            | 18/22  | 3.7962 | IM*NTFSVVPSPK     |    |   |    |   |       |        |            |
|                      |                     |                   |          |                  |    |           | Tubulin beta-4 chain | Q9D6F9       | 49,586 | A      | 8                 | 10 | 4 | ko | 2 | 13/16 | 2.0644 | TAVCDIPPR  |
| ko                   | 2                   | 13/16             | 2.0644   | TAVCDIPPR        |    |           |                      |              |        |        |                   |    |   |    |   |       |        |            |
| ko                   | 2                   | 15/16             | 2.629    | YLTVAAVFR        |    |           |                      |              |        |        |                   |    |   |    |   |       |        |            |
| ko                   | 2                   | 15/16             | 2.629    | YLTVAAVFR        |    |           |                      |              |        |        |                   |    |   |    |   |       |        |            |
| ko                   | 2                   | 19/30             | 3.2862   | INVYYNEATGGNYVPR |    |           |                      |              |        |        |                   |    |   |    |   |       |        |            |
| ko                   | 2                   | 19/30             | 3.2862   | INVYYNEATGGNYVPR |    |           |                      |              |        |        |                   |    |   |    |   |       |        |            |
| ko                   | 2                   | 18/28             | 3.7216   | AVLVDLEPGTM*DSVR |    |           |                      |              |        |        |                   |    |   |    |   |       |        |            |
| ko                   | 2                   | 18/28             | 3.7216   | AVLVDLEPGTM*DSVR |    |           |                      |              |        |        |                   |    |   |    |   |       |        |            |
| wt                   | 2                   | 15/16             | 2.73     | TAVCDIPPR        |    |           |                      |              |        |        |                   |    |   |    |   |       |        |            |
| wt                   | 2                   | 15/16             | 2.73     | TAVCDIPPR        |    |           |                      |              |        |        |                   |    |   |    |   |       |        |            |
| wt                   | 2                   | 15/16             | 3.3898   | YLTVAAVFR        |    |           |                      |              |        |        |                   |    |   |    |   |       |        |            |
| wt                   | 2                   | 15/16             | 3.3898   | YLTVAAVFR        |    |           |                      |              |        |        |                   |    |   |    |   |       |        |            |
| wt                   | 2                   | 23/30             | 4.2184   | INVYYNEATGGNYVPR |    |           |                      |              |        |        |                   |    |   |    |   |       |        |            |
| wt                   | 2                   | 23/30             | 4.2184   | INVYYNEATGGNYVPR |    |           |                      |              |        |        |                   |    |   |    |   |       |        |            |
| wt                   | 2                   | 20/28             | 3.9356   | AVLVDLEPGTM*DSVR |    |           |                      |              |        |        |                   |    |   |    |   |       |        |            |
| wt                   | 2                   | 20/28             | 3.9356   | AVLVDLEPGTM*DSVR |    |           |                      |              |        |        |                   |    |   |    |   |       |        |            |
| wt                   | 2                   | 20/28             | 4.0911   | AVLVDLEPGTMDSVR  |    |           |                      |              |        |        |                   |    |   |    |   |       |        |            |
| wt                   | 2                   | 20/28             | 4.0911   | AVLVDLEPGTMDSVR  |    |           |                      |              |        |        |                   |    |   |    |   |       |        |            |
| Tubulin beta-5 chain | P99024              | 49,671            | B        | 2                | 4  | 3         |                      |              |        |        |                   |    |   | ko | 2 | 15/16 | 2.154  | TAVCDIPPR  |
|                      |                     |                   |          |                  |    |           |                      |              |        |        |                   |    |   | ko | 2 | 17/18 | 3.22   | LAVNMVPFPR |

| protein name                    | Swiss-Prot<br>acc. no. | protein<br>mass<br>(Da) | data<br>set | matched<br>peptides |    | slice<br>no. | sample | charge<br>state | ions  | Xcorr  | assigned sequence  |
|---------------------------------|------------------------|-------------------------|-------------|---------------------|----|--------------|--------|-----------------|-------|--------|--------------------|
|                                 |                        |                         |             | ko                  | wt |              |        |                 |       |        |                    |
|                                 |                        |                         |             |                     |    |              | wt     | 2               | 14/18 | 2.706  | FPGQLNADLR         |
|                                 |                        |                         |             |                     |    |              | wt     | 2               | 14/16 | 2.18   | YLTVAAVFR          |
|                                 |                        |                         |             |                     |    |              | wt     | 3               | 24/40 | 2.818  | FPGQLNADLRK        |
|                                 |                        |                         |             |                     |    |              | wt     | 2               | 18/28 | 2.89   | AVLVLDLEPGTMDSVR   |
|                                 |                        |                         | C           | 10                  | 14 | 4            | ko     | 2               | 12/22 | 2.288  | IMNTFSVVPSPK       |
|                                 |                        |                         |             |                     |    |              | ko     | 2               | 14/16 | 2.77   | TAVCDIPPR          |
|                                 |                        |                         |             |                     |    |              | ko     | 2               | 13/18 | 2.556  | FPGQLNADLR         |
|                                 |                        |                         |             |                     |    |              | ko     | 2               | 17/18 | 3.082  | FPGQLNADLR         |
|                                 |                        |                         |             |                     |    |              | ko     | 2               | 17/18 | 2.939  | FPGQLNADLR         |
|                                 |                        |                         |             |                     |    |              | ko     | 2               | 15/22 | 3.373  | IMNTFSVVPSPK       |
|                                 |                        |                         |             |                     |    |              | ko     | 2               | 17/18 | 3.583  | LAVNMVPEPR         |
|                                 |                        |                         |             |                     |    |              | ko     | 2               | 15/16 | 2.578  | NMMAACDPR          |
|                                 |                        |                         |             |                     |    |              | ko     | 2               | 17/18 | 3.199  | LAVNMVPEPR         |
|                                 |                        |                         |             |                     |    |              | ko     | 2               | 19/22 | 3.81   | EVDEQMLSVQSK       |
|                                 |                        |                         |             |                     |    |              | wt     | 2               | 17/22 | 3.148  | IMNTFSVVPSPK       |
|                                 |                        |                         |             |                     |    |              | wt     | 2               | 16/18 | 3.029  | FPGQLNADLR         |
|                                 |                        |                         |             |                     |    |              | wt     | 2               | 16/18 | 2.993  | FPGQLNADLR         |
|                                 |                        |                         |             |                     |    |              | wt     | 2               | 14/18 | 2.636  | LAVNMVPEPR         |
|                                 |                        |                         |             |                     |    |              | wt     | 2               | 19/22 | 3.78   | IMNTFSVVPSPK       |
|                                 |                        |                         |             |                     |    |              | wt     | 2               | 15/16 | 2.515  | TAVCDIPPR          |
|                                 |                        |                         |             |                     |    |              | wt     | 2               | 18/22 | 4.204  | IMNTFSVVPSPK       |
|                                 |                        |                         |             |                     |    |              | wt     | 2               | 16/28 | 3.043  | AVLVLDLEPGTMDSVR   |
|                                 |                        |                         |             |                     |    |              | wt     | 2               | 15/18 | 2.718  | LAVNMVPEPR         |
|                                 |                        |                         |             |                     |    |              | wt     | 2               | 17/18 | 3.107  | LAVNMVPEPR         |
|                                 |                        |                         |             |                     |    |              | wt     | 2               | 13/16 | 2.15   | NMMAACDPR          |
|                                 |                        |                         |             |                     |    |              | wt     | 2               | 15/18 | 2.566  | LAVNMVPEPR         |
|                                 |                        |                         |             |                     |    |              | wt     | 2               | 19/22 | 3.909  | EVDEQMLSVQSK       |
|                                 |                        |                         |             |                     |    |              | wt     | 2               | 19/22 | 3.482  | EVDEQMLSVQSK       |
| Vacuolar ATP synthase subunit A | P50516                 | 68,326                  | A           | 3                   | 3  | 3            | ko     | 2               | 11/16 | 2.24   | GVNVSALSR          |
|                                 |                        |                         |             |                     |    |              | ko     | 2               | 13/28 | 2.439  | TALVANTSNM*PVAAR   |
|                                 |                        |                         |             |                     |    |              | ko     | 2               | 18/32 | 4.2164 | LAEM*PADSGYPAYLGAR |
|                                 |                        |                         |             |                     |    |              | wt     | 2               | 14/16 | 2.6456 | GVNVSALSR          |
|                                 |                        |                         |             |                     |    |              | wt     | 2               | 14/32 | 2.2053 | LAEM*PADSGYPAYLGAR |
|                                 |                        |                         |             |                     |    |              | wt     | 3               | 24/64 | 4.2541 | IKADYAQLLEDM*QNAFR |
| Vacuolar ATP synthase subunit B | P62814                 | 56,551                  | A           | 4                   | 3  | 4            | ko     | 2               | 13/20 | 2.1076 | SGQVLEVSGSK        |
|                                 |                        |                         |             |                     |    |              | ko     | 2               | 13/18 | 1.9866 | TPVSEDM*LGR        |
|                                 |                        |                         |             |                     |    |              | ko     | 2               | 14/22 | 2.5875 | IPQSTLSEFYPR       |
|                                 |                        |                         |             |                     |    |              | ko     | 2               | 16/22 | 2.8117 | IPQSTLSEFYPR       |
|                                 |                        |                         |             |                     |    |              | wt     | 2               | 14/20 | 3.0022 | NFITQGPYENR        |
|                                 |                        |                         |             |                     |    |              | wt     | 2               | 14/22 | 2.5967 | IPQSTLSEFYPR       |
|                                 |                        |                         |             |                     |    |              | wt     | 2               | 22/28 | 4.4745 | AVVQVFEGTSGIDAK    |
|                                 |                        |                         | B           | 1                   | 2  |              | ko     | 2               | 18/28 | 3.049  | AVVQVFEGTSGIDAK    |
|                                 |                        |                         |             |                     |    |              | wt     | 2               | 19/28 | 3.036  | AVVQVFEGTSGIDAK    |
|                                 |                        |                         |             |                     |    |              | wt     | 2               | 21/28 | 3.694  | AVVQVFEGTSGIDAK    |
| Vesicle-fusing ATPase           | P46460                 | 82,613                  | A           | 6                   | 10 | 3            | ko     | 2               | 15/20 | 2.6393 | IAEESNFFPIK        |

| protein name | Swiss-Prot acc. no. | protein mass (Da) | data set | matched peptides |    | slice no. | sample | charge state | ions  | Xcorr  | assigned sequence |
|--------------|---------------------|-------------------|----------|------------------|----|-----------|--------|--------------|-------|--------|-------------------|
|              |                     |                   |          | ko               | wt |           |        |              |       |        |                   |
|              |                     |                   |          |                  |    |           | ko     | 2            | 17/24 | 3.3908 | VLDDGELLVQGTK     |
|              |                     |                   |          |                  |    |           | ko     | 2            | 18/24 | 4.0325 | VLDDGELLVQGTK     |
|              |                     |                   |          |                  |    |           | ko     | 2            | 17/22 | 3.018  | NFSGAELEGLVR      |
|              |                     |                   |          |                  |    |           | ko     | 2            | 13/24 | 2.8628 | SQLSCVVVDDIER     |
|              |                     |                   |          |                  |    |           | ko     | 2            | 14/20 | 2.9104 | IAEESNFPEIK       |
|              |                     |                   |          |                  |    |           | wt     | 2            | 15/20 | 2.5738 | IAEESNFPEIK       |
|              |                     |                   |          |                  |    |           | wt     | 2            | 16/18 | 2.8322 | LLDYVPIGPR        |
|              |                     |                   |          |                  |    |           | wt     | 2            | 14/18 | 3.1046 | KLLIIGTTSR        |
|              |                     |                   |          |                  |    |           | wt     | 2            | 14/20 | 2.6587 | IAEESNFPEIK       |
|              |                     |                   |          |                  |    |           | wt     | 2            | 18/22 | 3.1195 | NFSGAELEGLVR      |
|              |                     |                   |          |                  |    |           | wt     | 2            | 17/24 | 2.9614 | VLDDGELLVQGTK     |
|              |                     |                   |          |                  |    |           | wt     | 2            | 20/24 | 4.3509 | VLDDGELLVQGTK     |
|              |                     |                   |          |                  |    |           | wt     | 2            | 19/22 | 3.7818 | NFSGAELEGLVR      |
|              |                     |                   |          |                  |    |           | wt     | 2            | 20/24 | 3.5765 | SQLSCVVVDDIER     |
|              |                     |                   |          |                  |    |           | wt     | 3            | 24/60 | 3.725  | TPLVSVLLEGPVHSGK  |

**Supplementary Table 3: Proteins identified by LC-ESI-MS/MS in samples originating from both wild-type and  $\alpha 7$  nAChR knockout mice.** The columns indicate the Swiss-Prot accession number (acc. no), protein mass in Daltons (Da), whether the peptide was identified in data set A, B, or C (data set), the number of matched peptides in either wild type (wt) or  $\alpha 7$  nAChR knockout (ko) mouse brain samples, the gel slice from which the peptide originated, whether the peptide was identified originated in the wild-type (wt) or knockout (ko) sample, the charge state of the ion, the number of ions identified/the maximum number of ions (ions), the Xcorr value, and the assigned amino acid sequence. M\*, oxidized methionine residue.

Supplementary Table 4:

| Protein                                                | Swiss-Prot acc. no | Sub-cellular locations                          | Function                                                                                                       |
|--------------------------------------------------------|--------------------|-------------------------------------------------|----------------------------------------------------------------------------------------------------------------|
| <b>Basic metabolic proteins</b>                        |                    |                                                 |                                                                                                                |
| Adenylyl cyclase-associated protein 2                  | Q9CYT6             | Membrane, multi-pass                            | Member of CAP family, Binds actin.                                                                             |
| Aldehyde dehydrogenase, mitochondrial                  | P47738             | Mitochondrion matrix                            | Conversion of retinaldehyde to retinoic acid.                                                                  |
| Glutathione S-transferase Mu 1                         | P10649             | Cytoplasm                                       | Conjugation of reduced glutathione to exogenous and endogenous hydrophobic electrophiles                       |
| L-lactate dehydrogenase A chain                        | P06151             | Cytoplasm                                       | Fermentation of pyruvate to lactate.                                                                           |
| Myristoylated alanine-rich C-kinase substrate (MARCKS) | P26645             | Membrane, lipid-anchor; Cytoplasm, cytoskeleton | Cellular substrate for protein kinase C. Binds calmodulin, actin, and synapsin.                                |
| Protein disulfide-isomerase A3                         | P27773             | Endoplasmic reticulum                           | Catalyzes the rearrangement of -S-S- bonds in proteins.                                                        |
| Probable oxidoreductase KIAA1576                       | Q80TB8             | Cytoplasm                                       | Oxidoreductase.                                                                                                |
| Vacuolar proton translocating ATPase A isoform 1       | Q9Z1G4             | Cytoplasmic vesicle membrane                    | Required for assembly and activity of the vacuolar ATPase.                                                     |
| <b>Cell structure and protein trafficking</b>          |                    |                                                 |                                                                                                                |
| Alpha-catenin 2                                        | Q61301             | Cytoplasm, cytoskeleton                         | Cell-cell adhesion protein.                                                                                    |
| Ankyrin 2, isoform 1                                   | Q6PCN2             | Cytoplasm                                       | Regulation of apoptosis.                                                                                       |
| Ankyrin 2, isoform 2                                   | Q8C8R3             | Cytoplasm                                       | Regulation of apoptosis.                                                                                       |
| AP-2 complex subunit beta-1                            | Q9DBG3             | Cell membrane.                                  | Component of the adaptor complexes which link clathrin to receptors in coated vesicles.                        |
| AP-3 complex subunit beta-2                            | Q9JME5             | Golgi; Cytoplasmic vesicle                      | Plays a role in protein sorting in the late-Golgi/trans-Golgi network.                                         |
| Brain acid soluble protein 1; BASP1, NAP-22            | Q91XV3             | Membrane protein                                | Involved in cell projection and neuronal growth cones.                                                         |
| Endophilin-1                                           | Q62420             | Cytoplasm; Peripheral membrane protein          | Implicated in synaptic vesicle endocytosis.                                                                    |
| Endophilin-2                                           | Q62419             | Cytoplasm; Peripheral membrane protein          | Implicated in endocytosis.                                                                                     |
| Fascin                                                 | Q61553             | Cytoplasm                                       | Organizes filamentous actin into bundles, associates with beta-catenin.                                        |
| Gamma-soluble NSF attachment protein                   | Q9CWZ7             | Peripheral membrane protein                     | Vesicular transport between the endoplasmic reticulum and the Golgi apparatus.                                 |
| Homer protein homolog 1                                | Q9Z2Y3             | Cytoplasm, synapse; Postsynaptic cell membrane  | Postsynaptic density scaffolding protein, involved in neuronal plasticity, Ca <sup>++</sup> channel regulator. |
| Kinesin-like protein KIF2                              | P28740             | Cytoplasm                                       | Plus end-directed microtubule-dependent motor, regulate microtubule dynamics during axonal growth.             |
| Microtubule-associated protein tau                     | P10637             | Cytoplasm; Peripheral membrane protein          | Promotes axonal microtubule assembly and stability.                                                            |
| Myosin-VI                                              | Q64331             | Golgi; Cytoplasm; Peripheral membrane protein   | Vesicular membrane trafficking and cell migration.                                                             |
| Nck-associated protein 1                               | P28660             | Cell membrane, cell projection                  | Member of the lamellipodial complex that controls Rac-dependent actin remodeling.                              |
| Spectrin beta chain                                    | P15508             | Cytoplasm, cytoskeleton                         | The major constituent of the cytoskeletal network.                                                             |
| Synaptogyrin-1                                         | O55100             | Membrane protein, multi-pass                    | Associated with presynaptic vesicles and signal transmission.                                                  |
| Synaptotagmin-1                                        | Q8CHC4             | Cytoplasm                                       | Lipid phosphatase involved in lipid uncoating of vesicles in neurons.                                          |
| Syntaxin-1A                                            | O35526             | Membrane                                        | Involved in docking of synaptic vesicles at presynaptic active zones, neurotransmitter exocytosis.             |
| Syntaxin-1B                                            | O35525             | Membrane                                        | Involved in docking of synaptic vesicles at presynaptic active zones, neurotransmitter exocytosis.             |
| Tropomodulin-2                                         | Q9JKK7             | Cytoplasm                                       | Binds to the N-terminus of tropomyosin and to actin.                                                           |
| <b>Chaperones</b>                                      |                    |                                                 |                                                                                                                |
| 14-3-3 protein beta/alpha                              | Q9CQV8             | Cytoplasm                                       | Adapter protein implicated in the regulation of general and specialized signaling pathway.                     |
| 14-3-3 protein eta                                     | P68510             | Cytoplasm                                       | Adapter protein implicated in the regulation of general and specialized signaling pathway.                     |
| 14-3-3 sigma                                           | O70456             | Cytoplasm                                       | Adapter protein implicated in the regulation of general and specialized signaling pathway.                     |
| Gelsolin Actin-depolymerizing factor Brevin            | P13020             | Cytoplasm, cytoskeleton                         | Calcium-regulated, actin-modulating protein that binds to the plus ends of actin.                              |
| Heat shock protein HSP 90-beta                         | P11499             | Cytoplasm                                       | Molecular chaperone. Has ATPase activity.                                                                      |
| <b>Proteolytic pathway proteins</b>                    |                    |                                                 |                                                                                                                |
| Ubiquitin carboxyl-terminal hydrolase 5                | P56399             | Cytoplasm                                       | Cleaves linear and branched multiubiquitin polymers                                                            |
| Ubiquitin-activating enzyme E1                         | Q02053             | Cytoplasm                                       | Activator in ubiquitin protein degradation pathway.                                                            |
| <b>Signal transduction</b>                             |                    |                                                 |                                                                                                                |
| Calmodulin                                             | P62204             | Cytoplasm                                       | Mediates the control of a large number of enzymes and other proteins by Ca <sup>++</sup> binding.              |
| cAMP-dependent protein kinase, PKA                     | P68181             | Cytoplasm                                       | Mediates cAMP-dependent signaling triggered by receptor binding to GPCRs.                                      |
| Clathrin coat assembly protein AP180 (SNAP91)          | Q61548             | Membrane                                        | Believed to interact with the cytoplasmic tails of membrane proteins                                           |
| Contactin-1                                            | P12960             | Membrane, lipid-anchor                          | Mediates cell surface interactions during nervous system development.                                          |



| Protein                                                  | Swiss-Prot acc. no | Sub-cellular locations                    | Function                                                                                             |
|----------------------------------------------------------|--------------------|-------------------------------------------|------------------------------------------------------------------------------------------------------|
| Guanine nucleotide-binding protein alpha-12 subunit      | P27600             | Membrane, lipid-anchor                    | Modulators or transducers in various transmembrane signaling systems.                                |
| Guanine nucleotide-binding protein G(i), alpha-2 subunit | P08752             | Membrane, lipid-anchor                    | Involved in hormonal regulation of adenylate cyclase.                                                |
| Guanine nucleotide-binding protein G(q) subunit alpha    | P21279             | Membrane, lipid-anchor                    | Modulator or transducer in various transmembrane signaling systems.                                  |
| Mitsugumin-23                                            | Q3UBX0             | Endoplasmic reticulum membrane            | Widely distributed protein may play a role in mediating protein-protein interactions.                |
| Guanine nucleotide-binding protein G(l)/G(s)/G(t) beta 3 | Q61011             | Membrane, lipid-anchor                    | Modulator or transducer in various transmembrane signaling systems.                                  |
| Guanine nucleotide-binding protein G(o) subunit alpha 1  | P18872             | Membrane, lipid-anchor                    | Modulator or transducer in various transmembrane signaling systems.                                  |
| Neuromodulin (GAP-43)                                    | P06837             | Peripheral membrane protein, axonal       | Located in growth cone, bind calmodulin with greater affinity in absence of Ca <sup>++</sup> .       |
| Phosphatase 2A inhibitor, TAF-1, SET                     | Q9EQU5             | Cytoplasm; Endoplasmic reticulum          | Multitasking protein, involved in apoptosis, transcription, nucleosome assembly and histone binding. |
| Protein kinase C gamma type                              | P63318             | Cytoplasm                                 | Calcium-activated, phospholipid-dependent, serine- and threonine-specific enzyme.                    |
| Protein phosphatase 1 regulatory subunit 7               | Q3UM45             | Nucleus                                   | Regulatory subunit of protein phosphatase 1.                                                         |
| Ras-related protein Rab-2A                               | P53994             | Endoplasmic reticulum; Golgi              | Required for protein transport from the endoplasmic reticulum to the Golgi complex.                  |
| Serine/threonine-protein phosphatase 2B catalytic        | P63328             | Nucleus                                   | Calcium-dependent, calmodulin-stimulated protein phosphatase.                                        |
| Serine/threonine-protein phosphatase PP1-alpha           | P62137             | Cytoplasm                                 | Regulation of glycogen metabolism, muscle contractility and protein synthesis.                       |
| Tenascin-R                                               | Q8BY19             | Neural extracellular matrix (ECM) protein | Evokes a stable adhesion and differentiation, or repulsion and inhibition of neurite growth.         |
| Transgelin-3                                             | Q9R1Q8             | Cytoplasm                                 | Actin cross linker, binds calcium.                                                                   |

**Supplementary Table 4: Sub-cellular location and function of proteins listed in Table 1.** Information

on sub-cellular location and function was obtained from the Swiss-Prot (<http://ca.expasy.org/sprot/>) and

NCBI databases (<http://www.ncbi.nlm.nih.gov/>).
